# Supplementary material for: Copper(ii) catalyzed synthesis of novel helical luminescent benzo[4,5]imidazo[1,2-a][1,10]phenanthrolines via an intramolecular C–H amination reaction
Source: Royal Society of Chemistry journal article supplement (doi:10.1039/c6ob02508k), 2016-12-14
Supplement: c6ob02508k1.pdf [file c6ob02508k1.pdf]

## Supporting Information

### Copper(II) Catalyzed Synthesis of Novel Helical Luminescent Benzo[4,5]imidazo[1,2-*a*][1,10]phenanthrolines via an Intramolecular C–H Amination Reaction

Ramon Borges da Silva,<sup>a</sup> Rodolfo Inêz Teixeira,<sup>a</sup> James L. Wardell,<sup>b,c</sup> Solange M. S. V. Wardell,<sup>d</sup> and Simon J. Garden<sup>a\*</sup>

<sup>a</sup> Instituto de Química, Universidade Federal do Rio de Janeiro, Centro Tecnológica, Bloco A, Cidade Universitária, Ilha do Fundão, 21949-909 Rio de Janeiro, RJ, Brazil.

<sup>b</sup> Instituto de Tecnologia em Fármacos – Farmanguinhos, Fiocruz. R. Sizenando Nabuco, 100, Manguinhos, 21041-250, Rio de Janeiro, RJ, Brazil.

<sup>c</sup> Department of Chemistry, University of Aberdeen, Old Aberdeen, AB24 3UE, Scotland

<sup>d</sup> CHEMSOL, 1 Harcourt Road, Aberdeen AB15 5NY, Scotland.

\*E-mail: garden@iq.ufrj.br; Tel: +55-21-3938-7135

#### Contents

|                                                                                 | Pages   |
|---------------------------------------------------------------------------------|---------|
| <sup>1</sup> H, <sup>13</sup> C spectra of compounds <b>3</b>                   | 2 - 21  |
| <sup>1</sup> H, <sup>13</sup> C spectra of compound <b>5</b>                    | 22      |
| <sup>1</sup> H, <sup>13</sup> C spectra of compounds <b>6</b>                   | 23 - 34 |
| HRMS of compounds <b>3</b> , <b>5</b> and <b>6</b>                              | 35 - 50 |
| 2D NMR of compound <b>3a</b> and of compound <b>6a</b>                          | 51 - 53 |
| Theoretical calculations of <b>6a</b> and <b>6aTS</b>                           | 55 - 56 |
| Absorption, emission and excitation spectra of <b>6a</b> in different solvents. | 56 - 58 |
| Crystallography Experimental and details                                        | 59 - 66 |

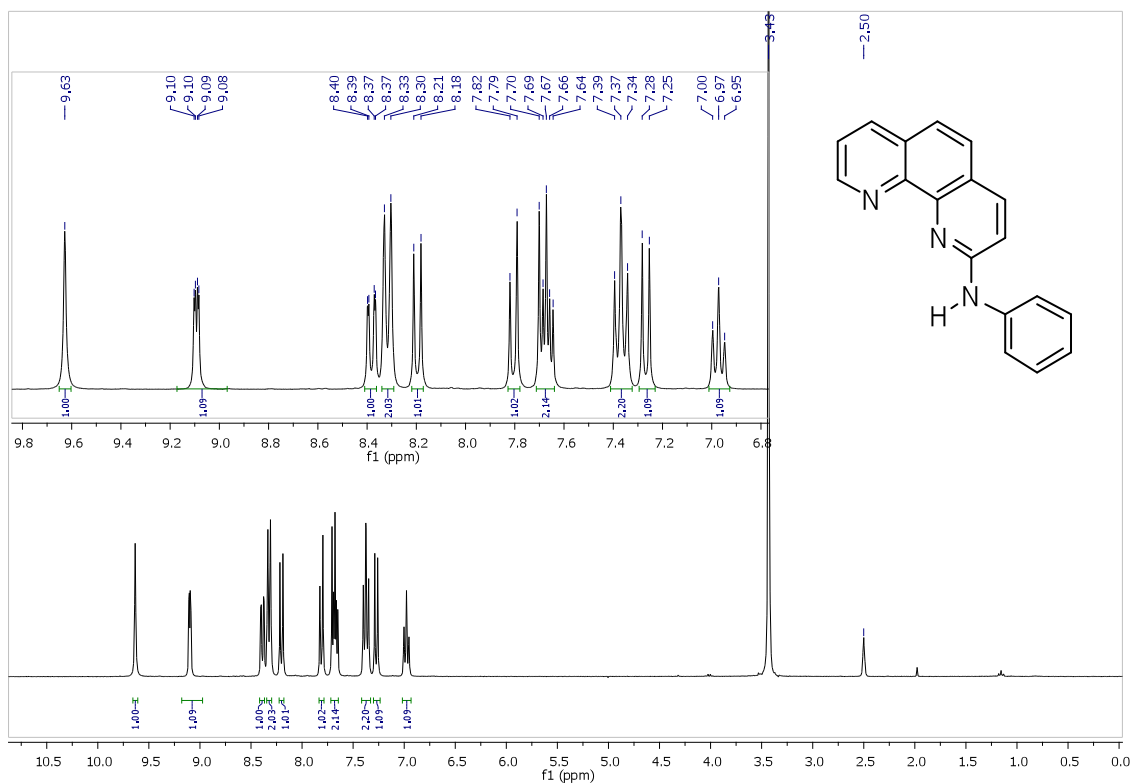

SI Figure 1: <sup>1</sup>H NMR: *N*-phenyl-1,10-phenanthroline (**3a**), (300 MHz, DMSO-d<sub>6</sub>).

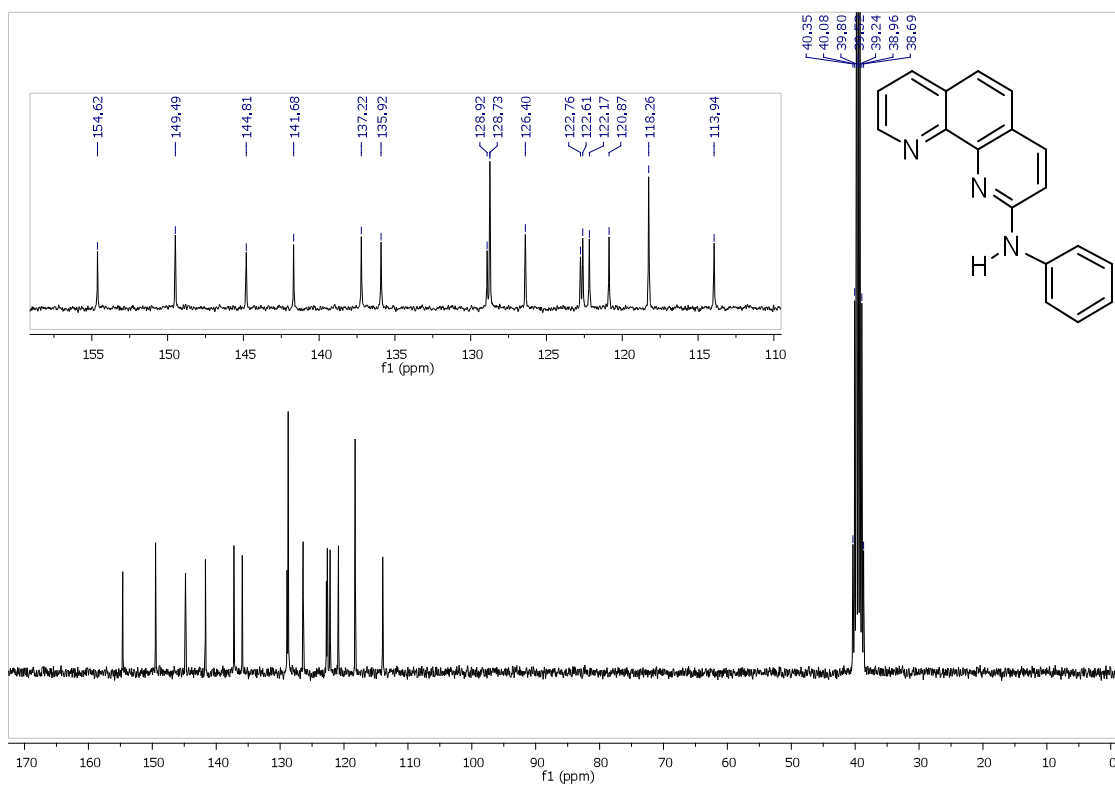

SI Figure 2: <sup>13</sup>C NMR: *N*-phenyl-1,10-phenanthroline (**3a**), (75 MHz, DMSO-d<sub>6</sub>).

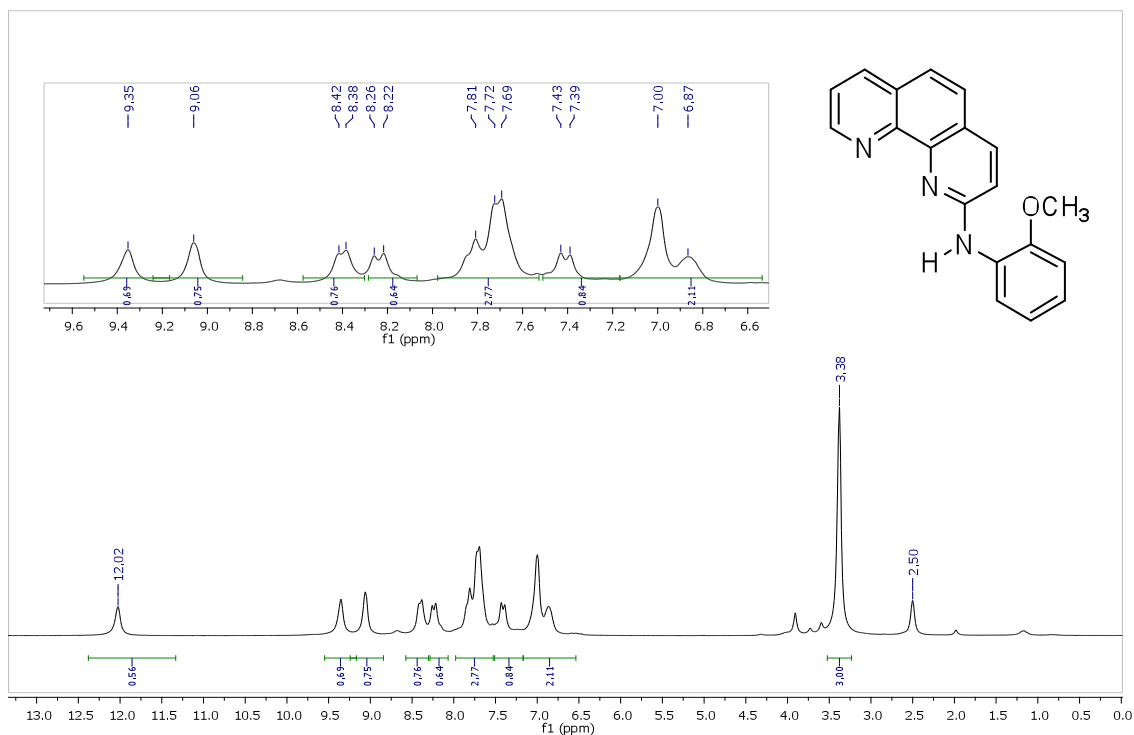

SI Figure 3: <sup>1</sup>H NMR: *N*-(2-methoxyphenyl)-1,10-phenanthroline-2-amine (3b), (200 MHz, DMSO-d<sub>6</sub>).

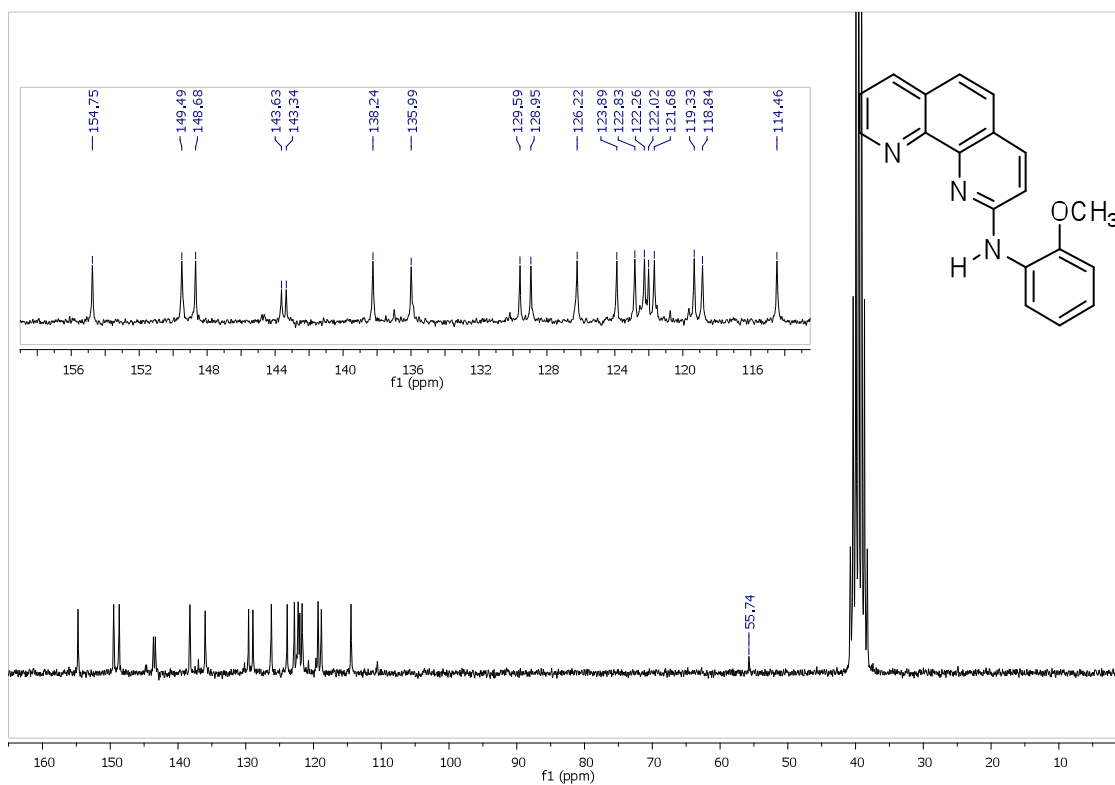

SI Figure 4: <sup>13</sup>C NMR: *N*-(2-methoxyphenyl)-1,10-phenanthroline-2-amine (3b), (50 MHz, DMSO-d<sub>6</sub>).

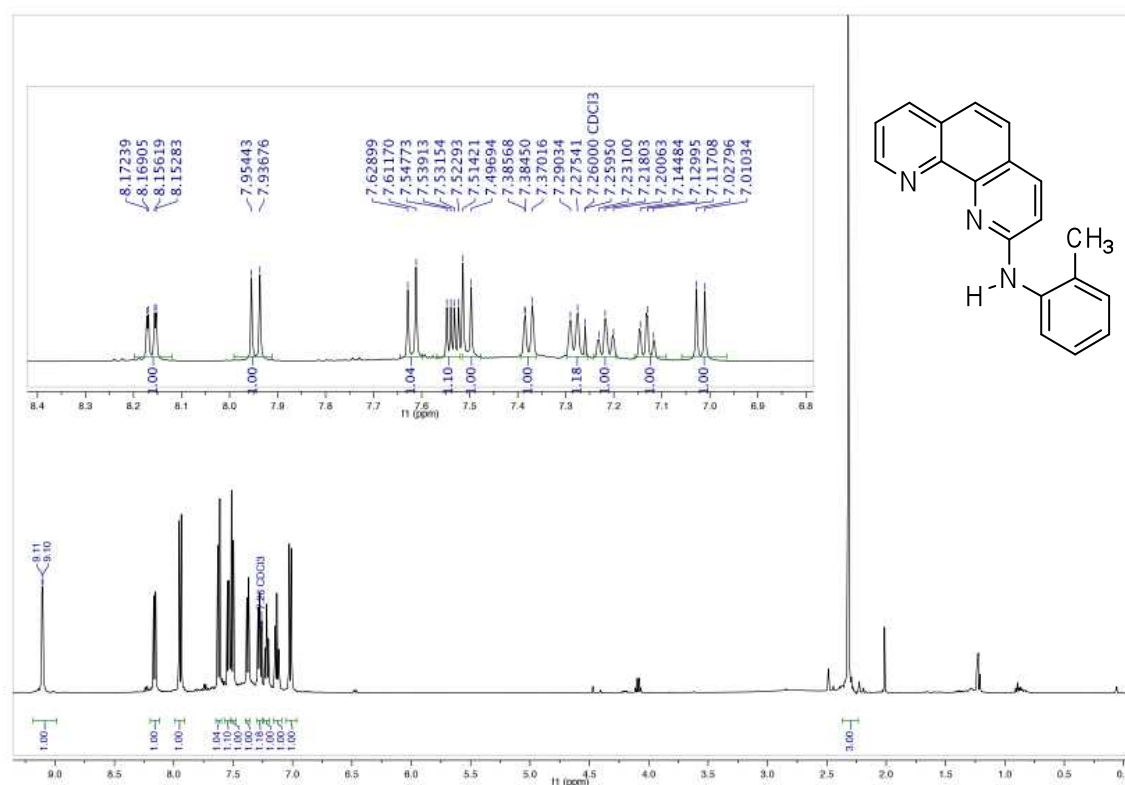

SI Figure 5: <sup>1</sup>H NMR *N*-*o*-tolyl-1,10-phenanthroline-2-amine (**3c**), (500 MHz, CDCl<sub>3</sub>).

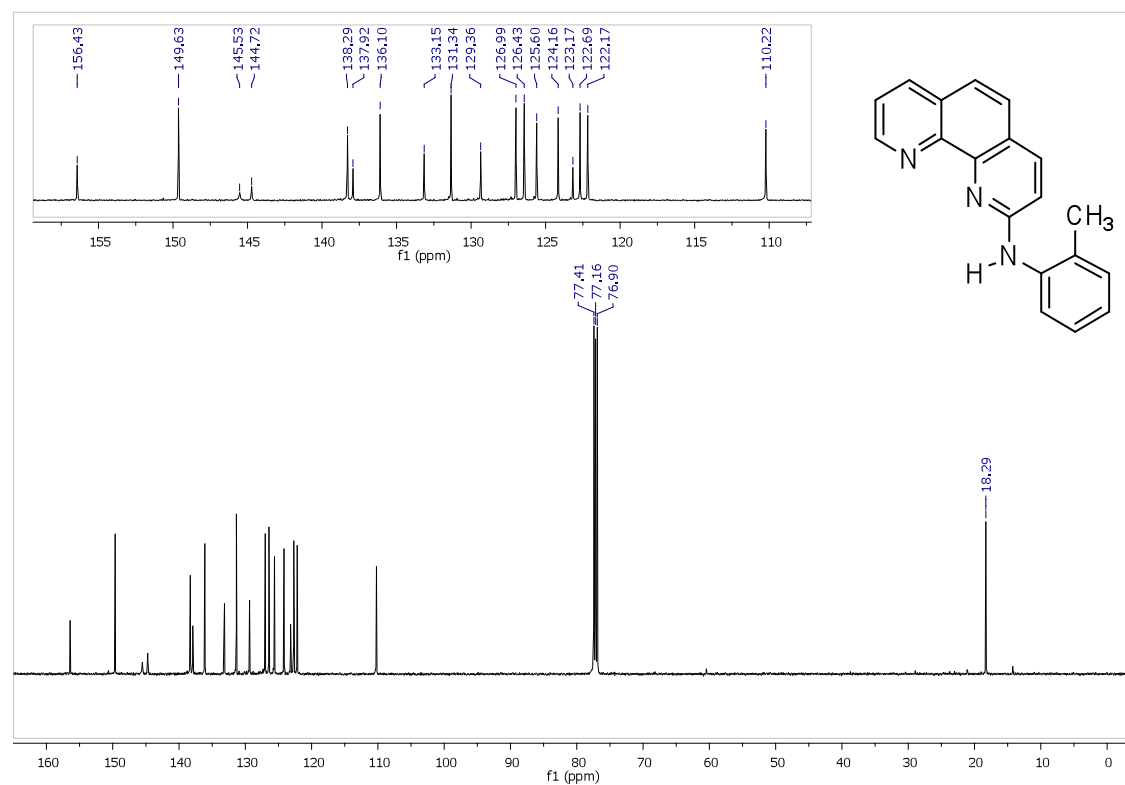

SI Figure 6: <sup>13</sup>C NMR: *N*-*o*-tolyl-1,10-phenanthroline-2-amine (**3c**), (125 MHz, CDCl<sub>3</sub>).

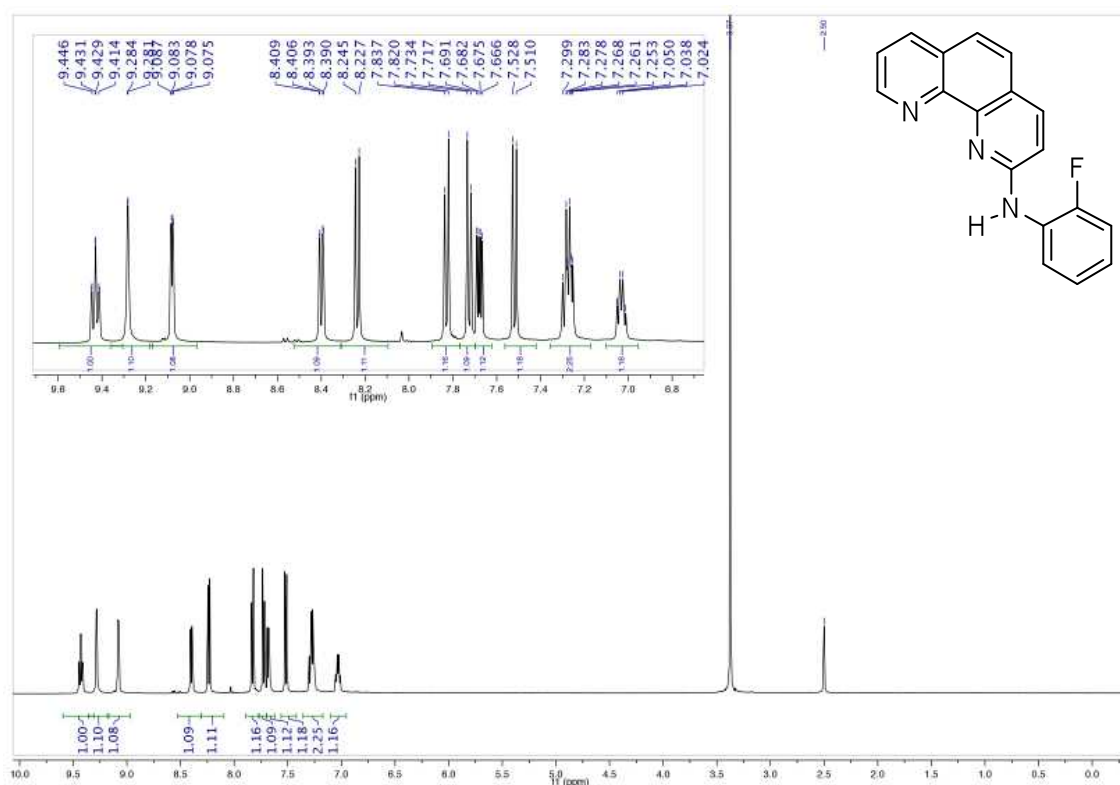

SI Figure 7: <sup>1</sup>H NMR: *N*-(2-fluorophenyl)-1,10-phenanthroline-2-amine (**3d**), (500 MHz, DMSO-d<sub>6</sub>)

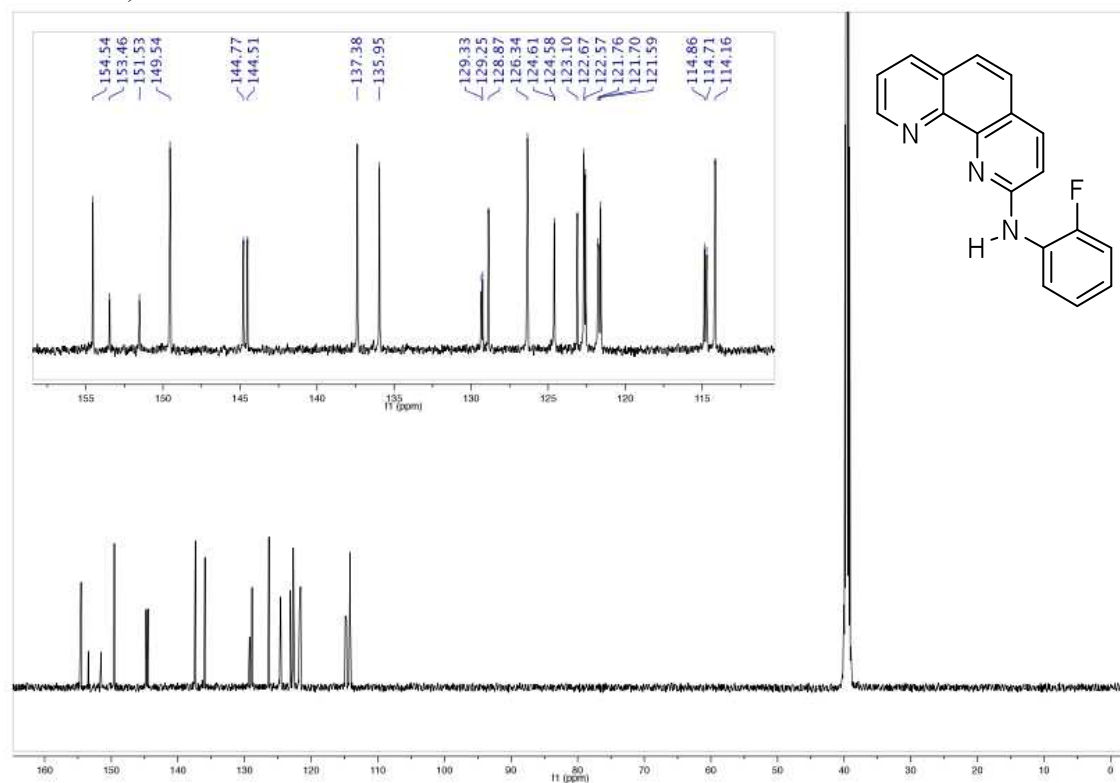

SI Figure 8: <sup>13</sup>C NMR: *N*-(2-fluorophenyl)-1,10-phenanthroline-2-amine (**3d**), (125 MHz, DMSO-d<sub>6</sub>)

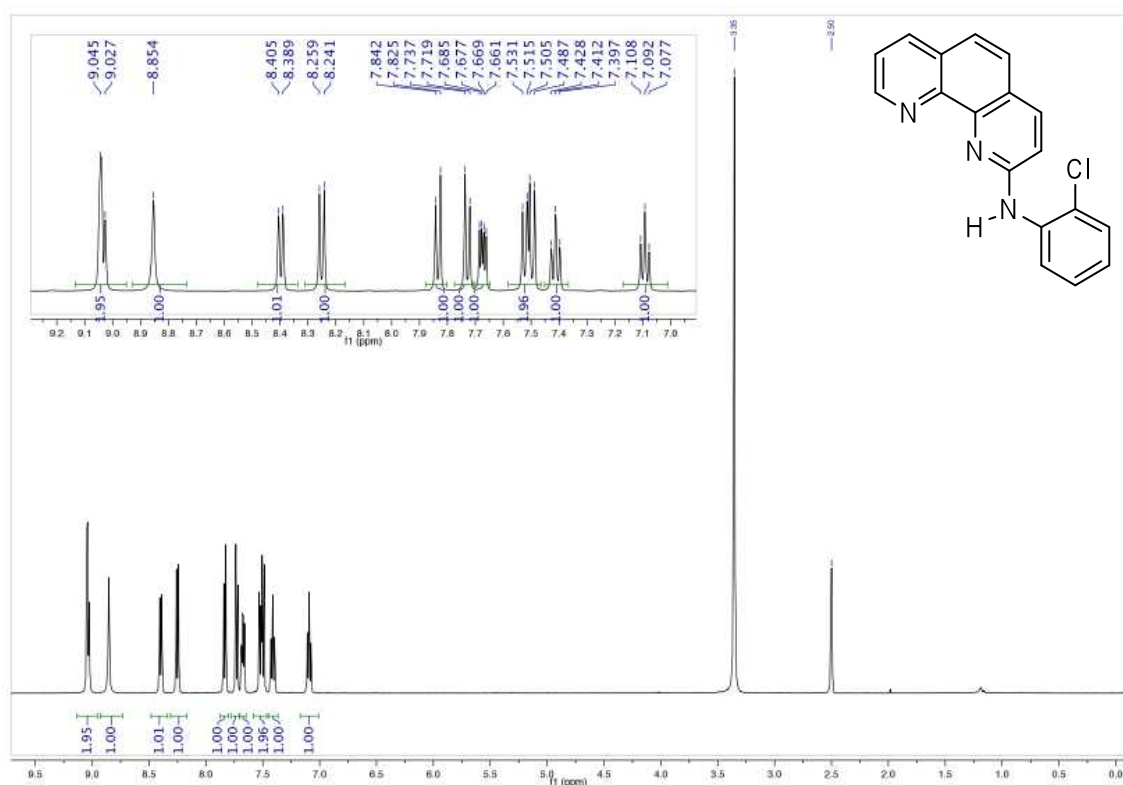

SI Figure 9: <sup>1</sup>H NMR: *N*-(2-chlorophenyl)-1,10-phenanthroline-2-amine (**3e**), (500 MHz, DMSO-d<sub>6</sub>).

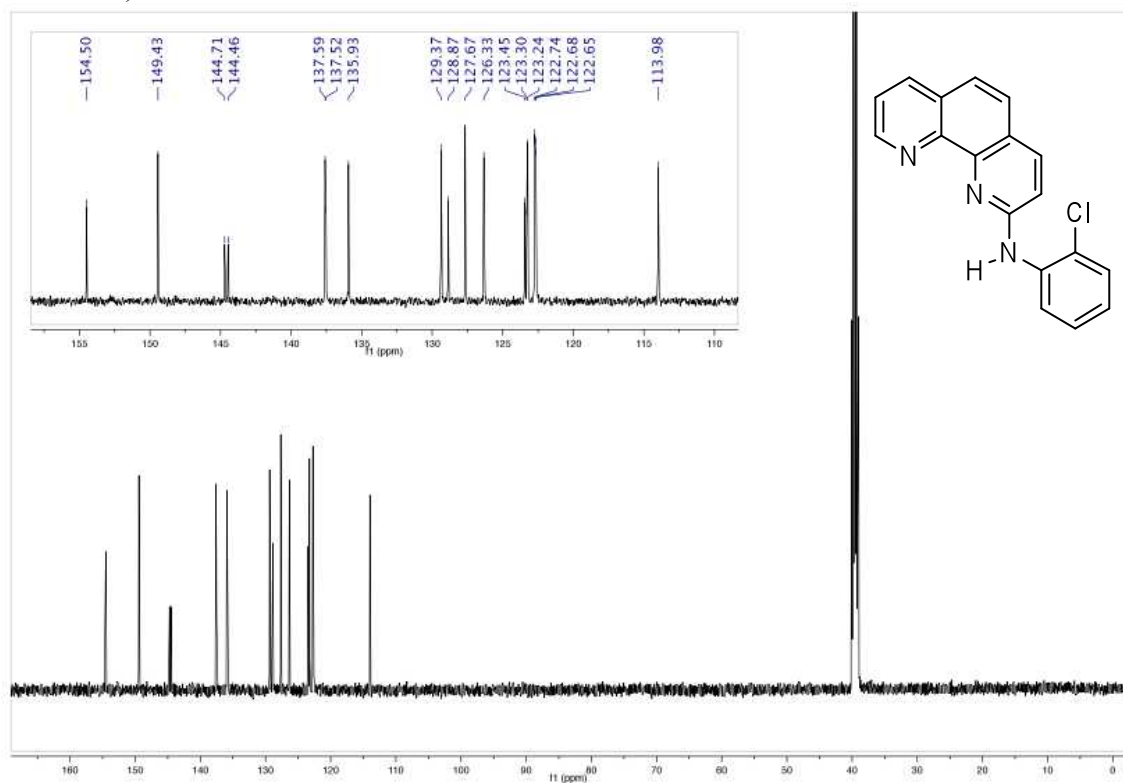

SI Figure 10: <sup>13</sup>C NMR: *N*-(2-chlorophenyl)-1,10-phenanthroline-2-amine (**3e**), (125 MHz, DMSO-d<sub>6</sub>).

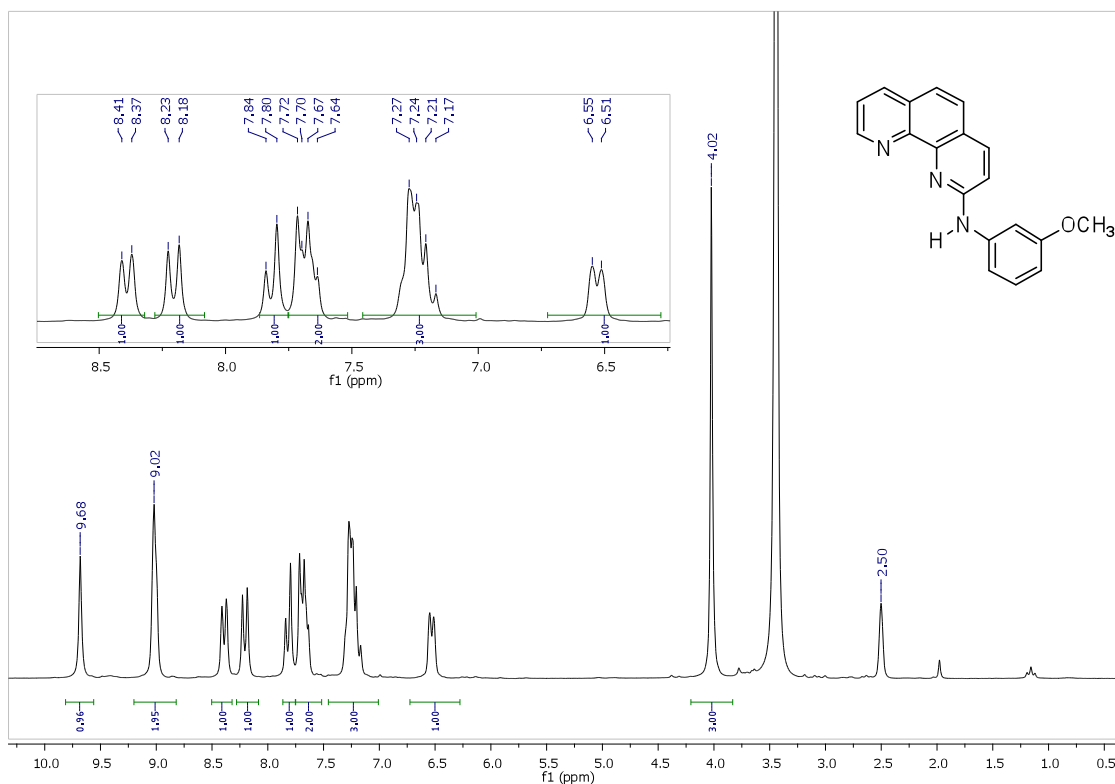

SI Figure 11: <sup>1</sup>H NMR: *N*-(3-methoxyphenyl)-1,10-phenanthroline-2-amine (**3f**), (200 MHz, DMSO-d<sub>6</sub>).

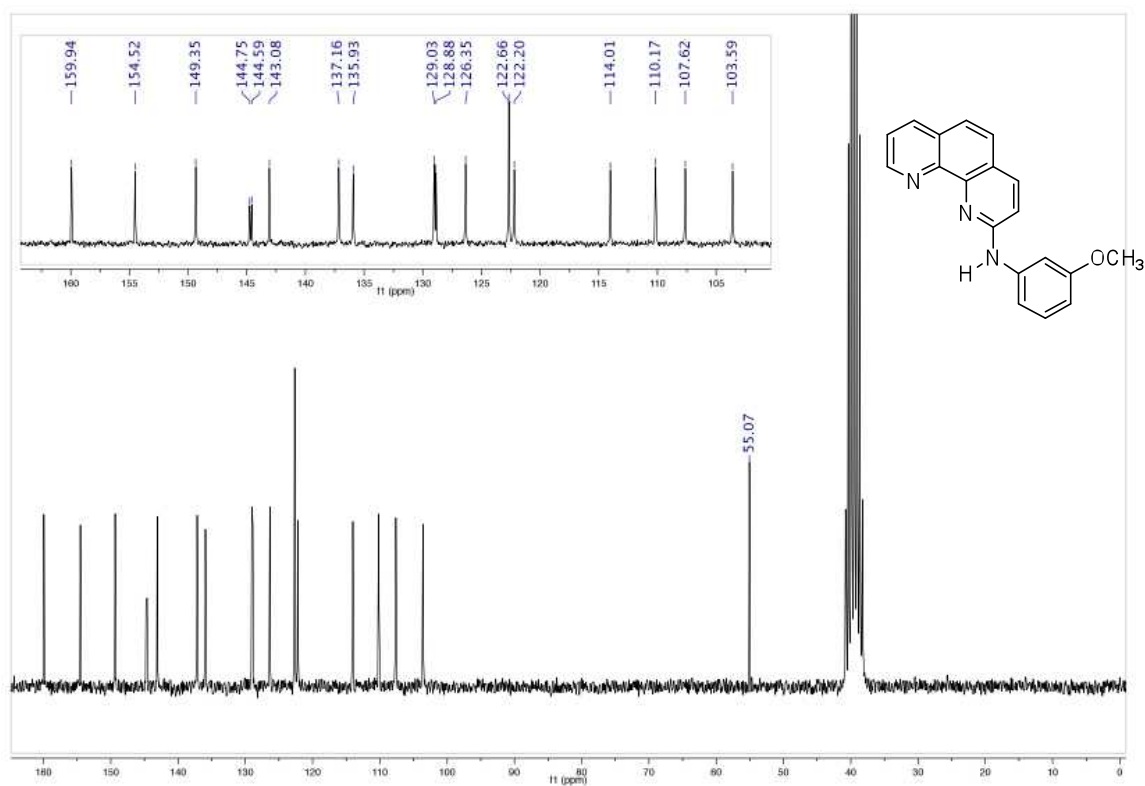

SI Figure 12: <sup>13</sup>C NMR: *N*-(3-methoxyphenyl)-1,10-phenanthroline-2-amine (**3f**), (50 MHz, DMSO-d<sub>6</sub>).

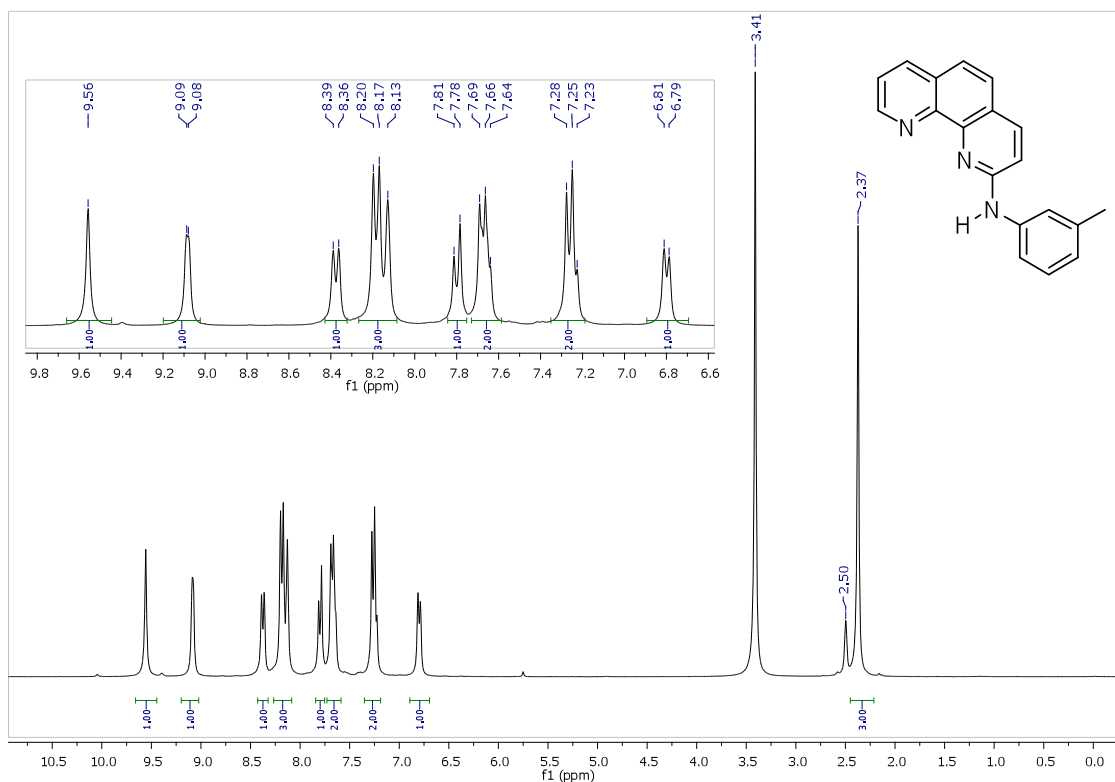

SI Figure 13: <sup>1</sup>H NMR: *N*-m-tolyl-1,10-phenanthroline-2-amine (**3g**), (300 MHz, DMSO-d<sub>6</sub>).

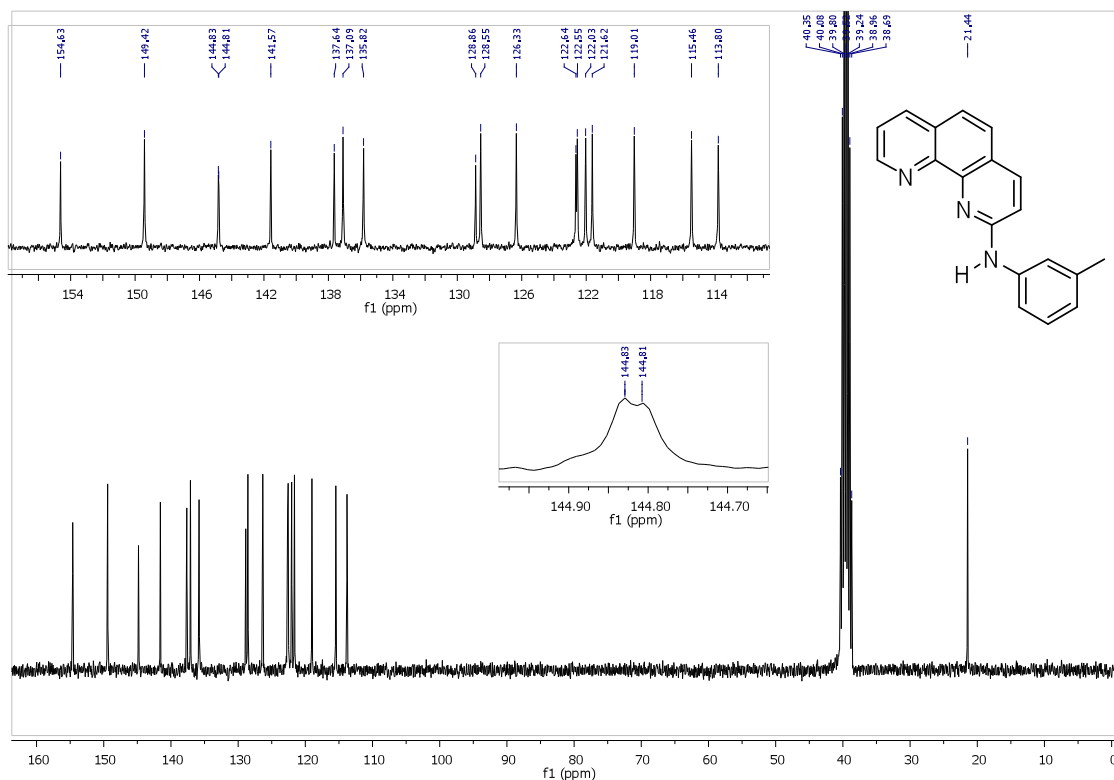

SI Figure 14: <sup>13</sup>C NMR: *N*-m-tolyl-1,10-phenanthroline-2-amine (**3g**), (75 MHz, DMSO-d<sub>6</sub>).



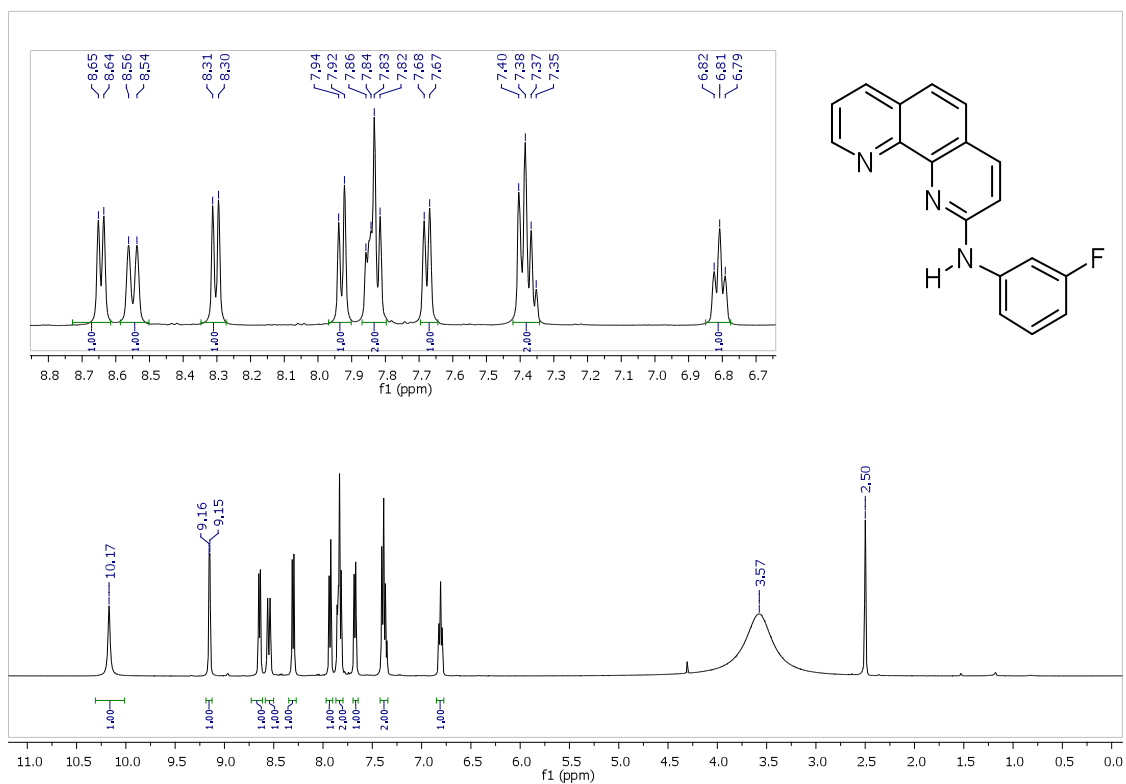

SI Figure 15: <sup>1</sup>H NMR: *N*-(3-fluorophenyl)-1,10-phenanthroline-2-amine (**3h**), (500 MHz, DMSO-*d*<sub>6</sub>).

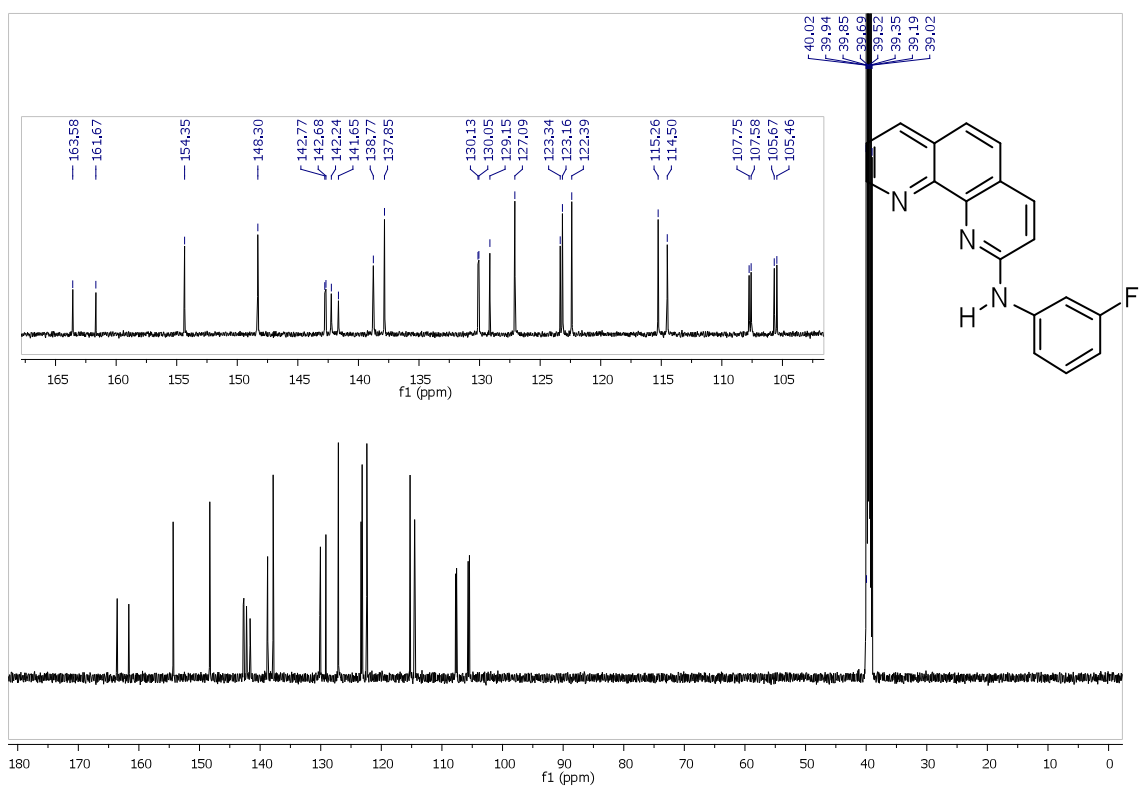

SI Figure 16: <sup>13</sup>C NMR: *N*-(3-fluorophenyl)-1,10-phenanthroline-2-amine (**3h**), (125 MHz, DMSO-*d*<sub>6</sub>).

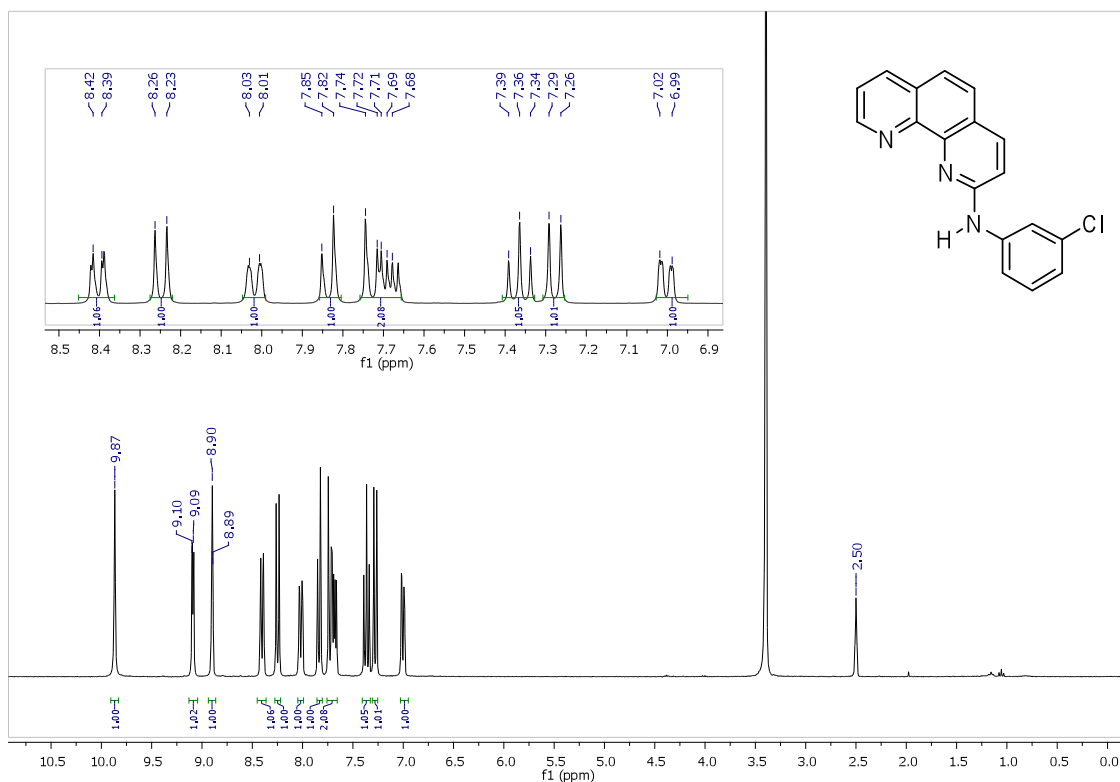

SI Figure 17: <sup>1</sup>H NMR: *N*-(3-chlorophenyl)-1,10-phenanthroline-2-amine (**3i**), (300 MHz, DMSO-*d*<sub>6</sub>).

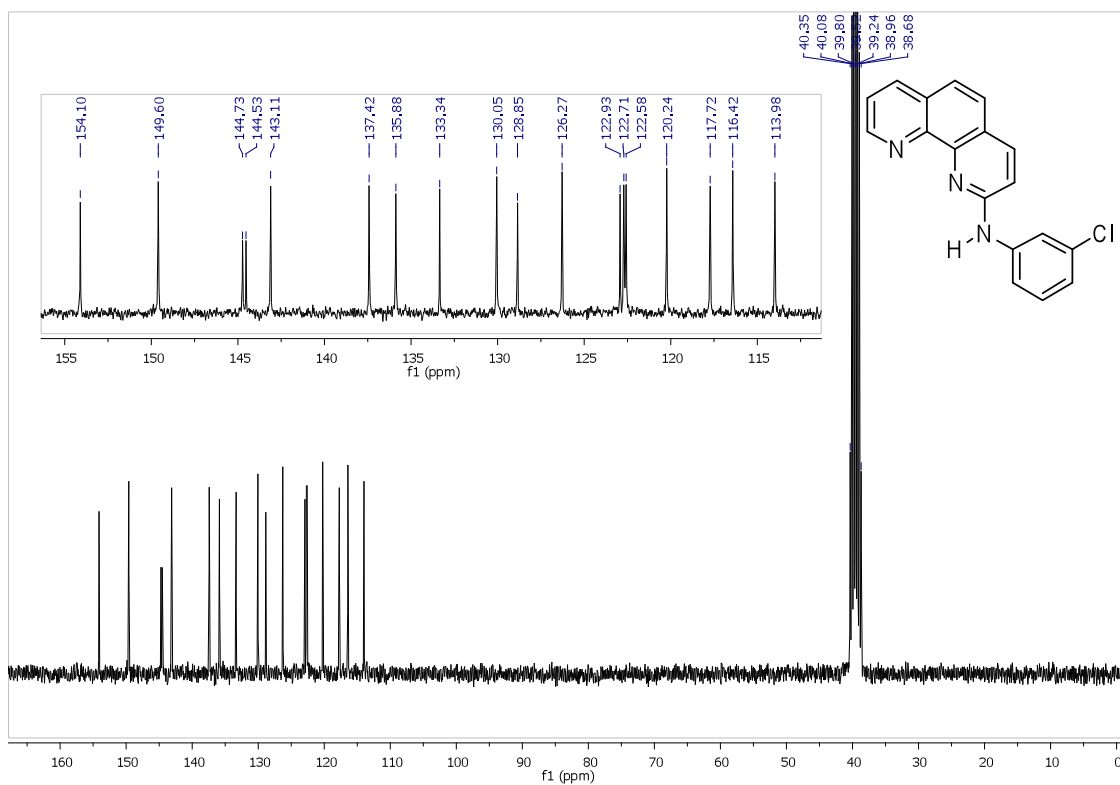

SI Figure 18: <sup>13</sup>C NMR: *N*-(3-chlorophenyl)-1,10-phenanthroline-2-amine (**3i**), (75 MHz, DMSO-*d*<sub>6</sub>).

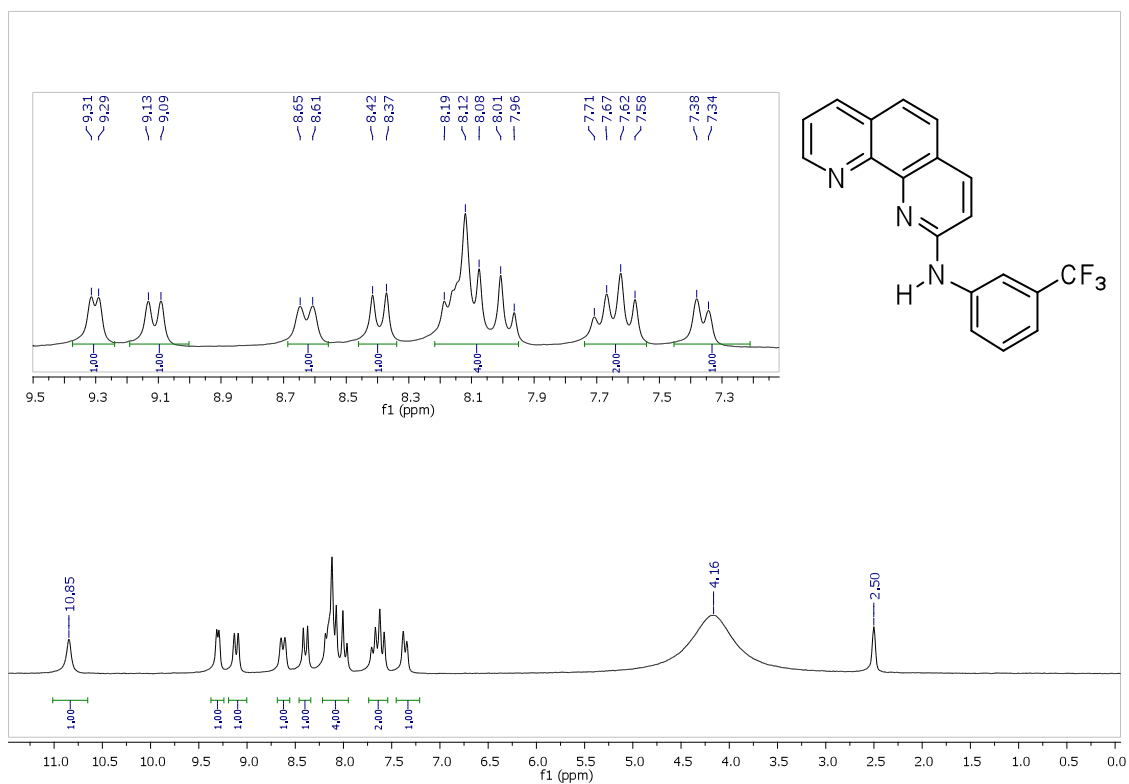

SI Figure 19: <sup>1</sup>H NMR: *N*-(3-(trifluoromethyl)phenyl)-1,10-phenanthroline-2-amine (**3j**) (200 MHz, DMSO-d<sub>6</sub>).

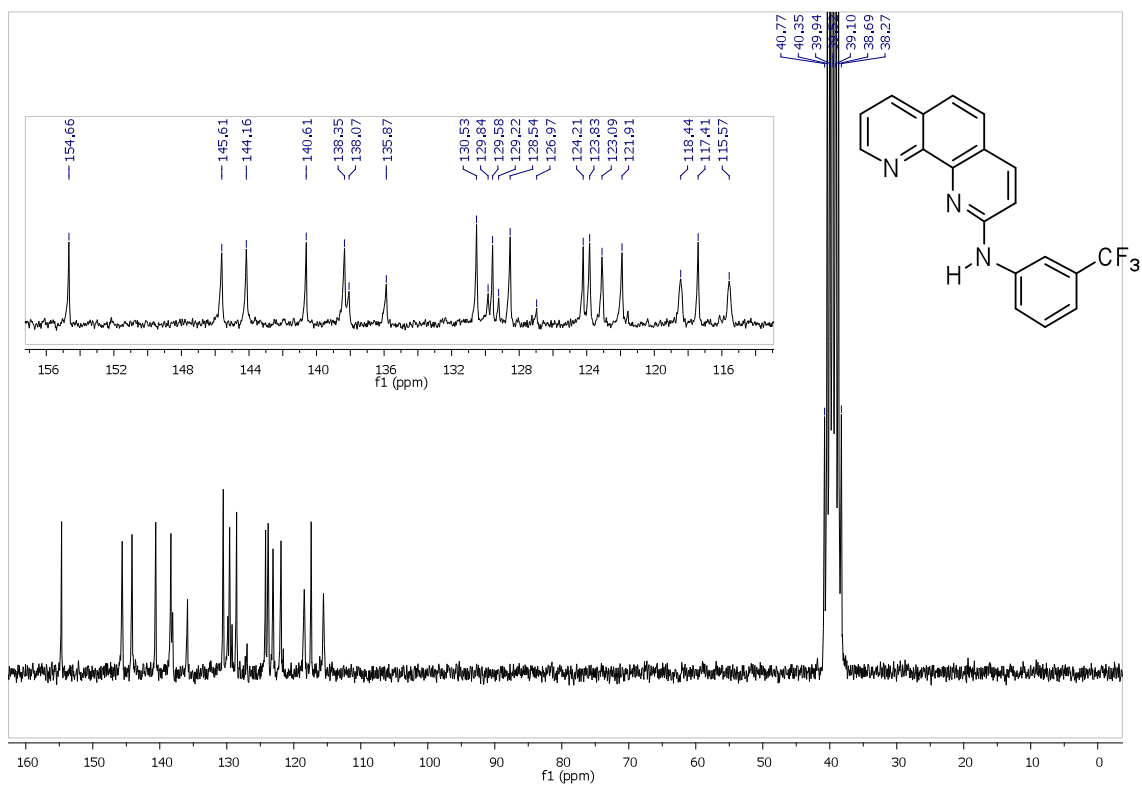

SI Figure 20: <sup>13</sup>C NMR: *N*-(3-(trifluoromethyl)phenyl)-1,10-phenanthroline-2-amine (**3j**), (50 MHz, DMSO-d<sub>6</sub>)

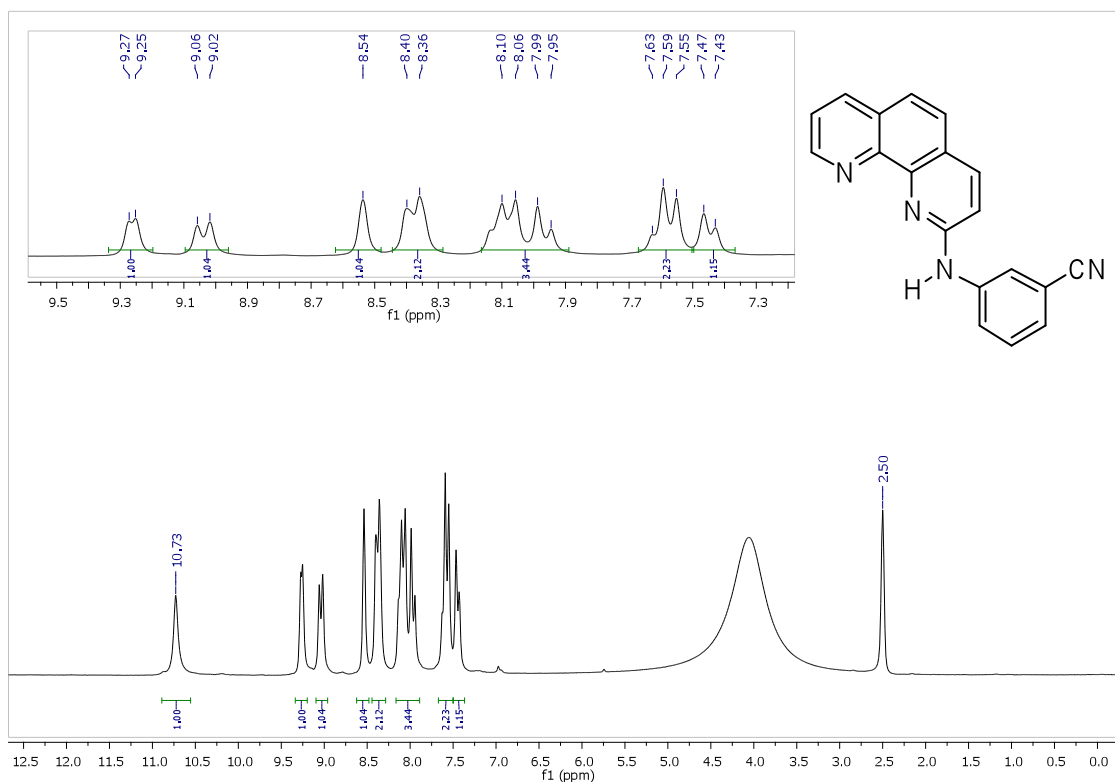

SI Figure 21: <sup>1</sup>H NMR: 3-(1,10-phenanthrolin-2-ylamino)benzonitrile (**3k**), (200 MHz, DMSO-d<sub>6</sub>).

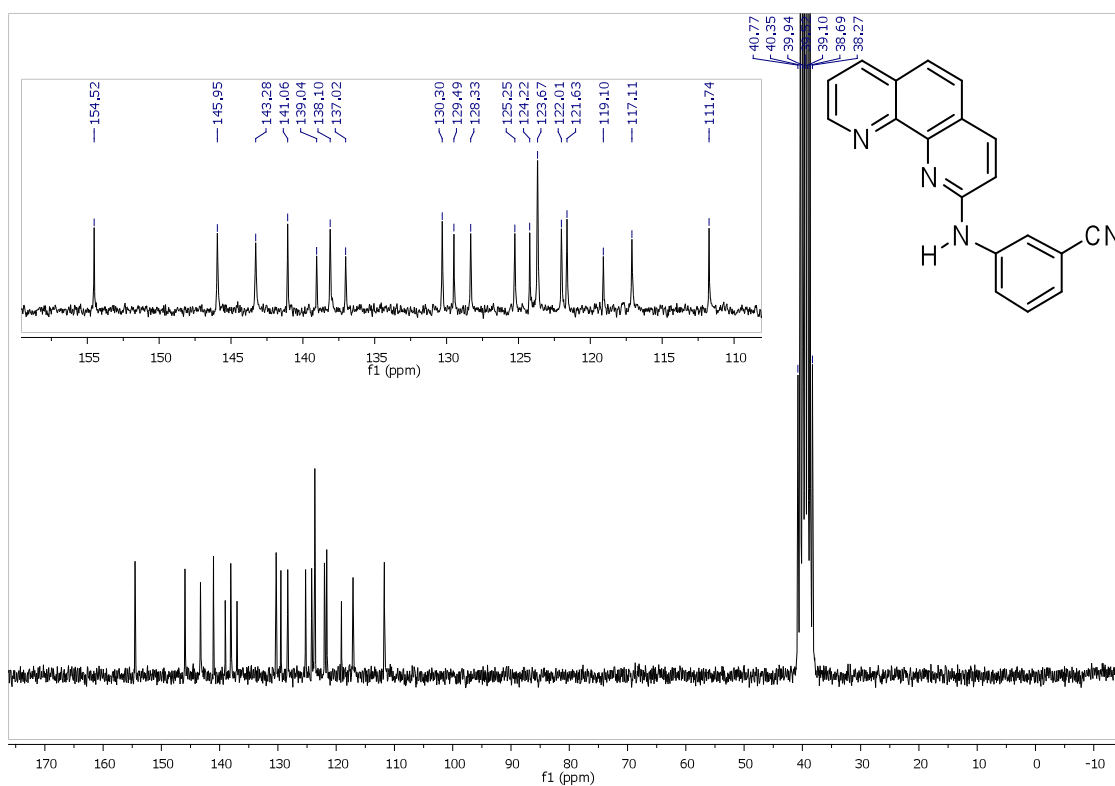

SI Figure 22: <sup>13</sup>C NMR: 3-(1,10-phenanthrolin-2-ylamino)benzonitrile (**3k**), (50 MHz, DMSO-d<sub>6</sub>).

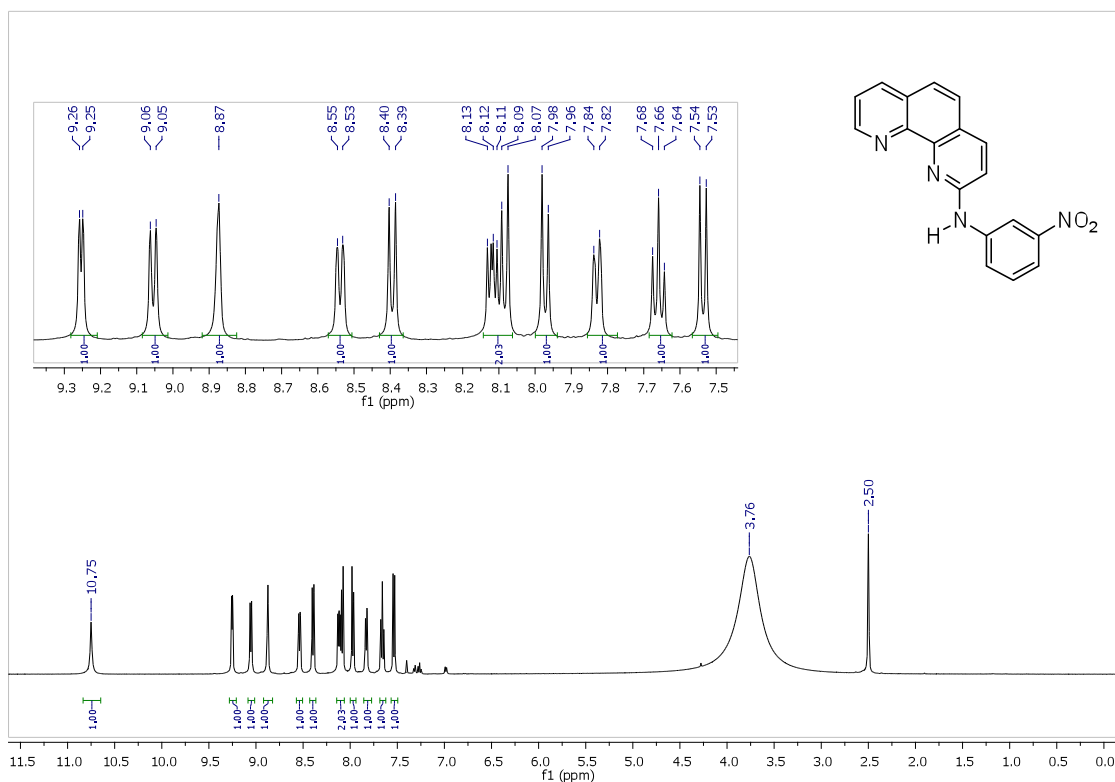

SI Figure 23: <sup>1</sup>H NMR: *N*-(3-nitrophenyl)-1,10-phenanthroline-2-amine (**31**), (500 MHz, DMSO-*d*<sub>6</sub>).

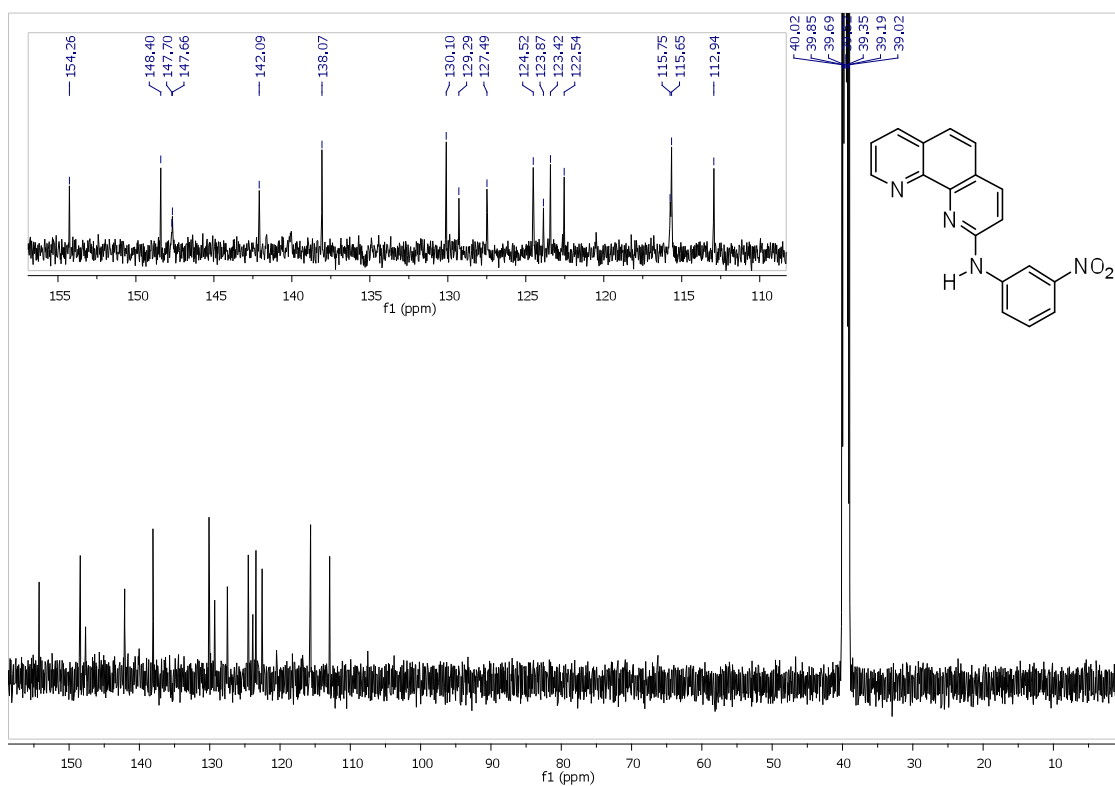

SI Figure 24: <sup>13</sup>C NMR: *N*-(3-nitrophenyl)-1,10-phenanthroline-2-amine (**31**), (125 MHz, DMSO-*d*<sub>6</sub>).

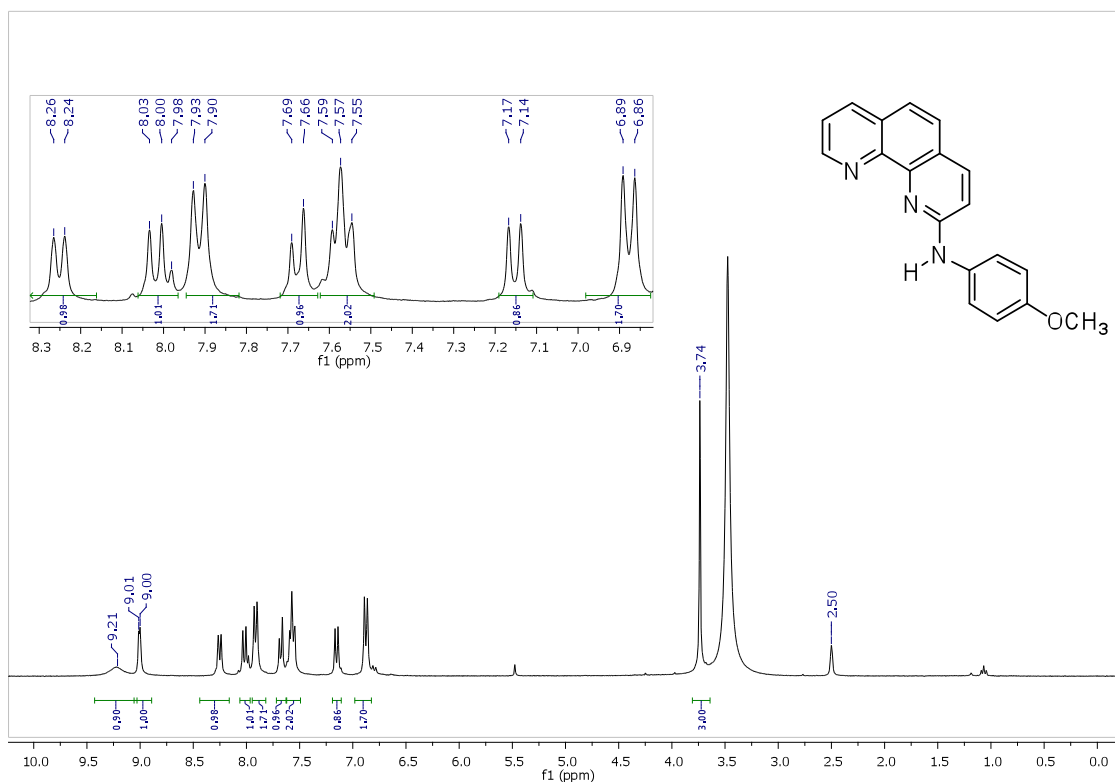

SI Figure 25:  $^1\text{H}$  NMR: *N*-(4-methoxyphenyl)-1,10-phenanthroline-2-amine (**3m**), (300 MHz,  $\text{DMSO-d}_6$ ).

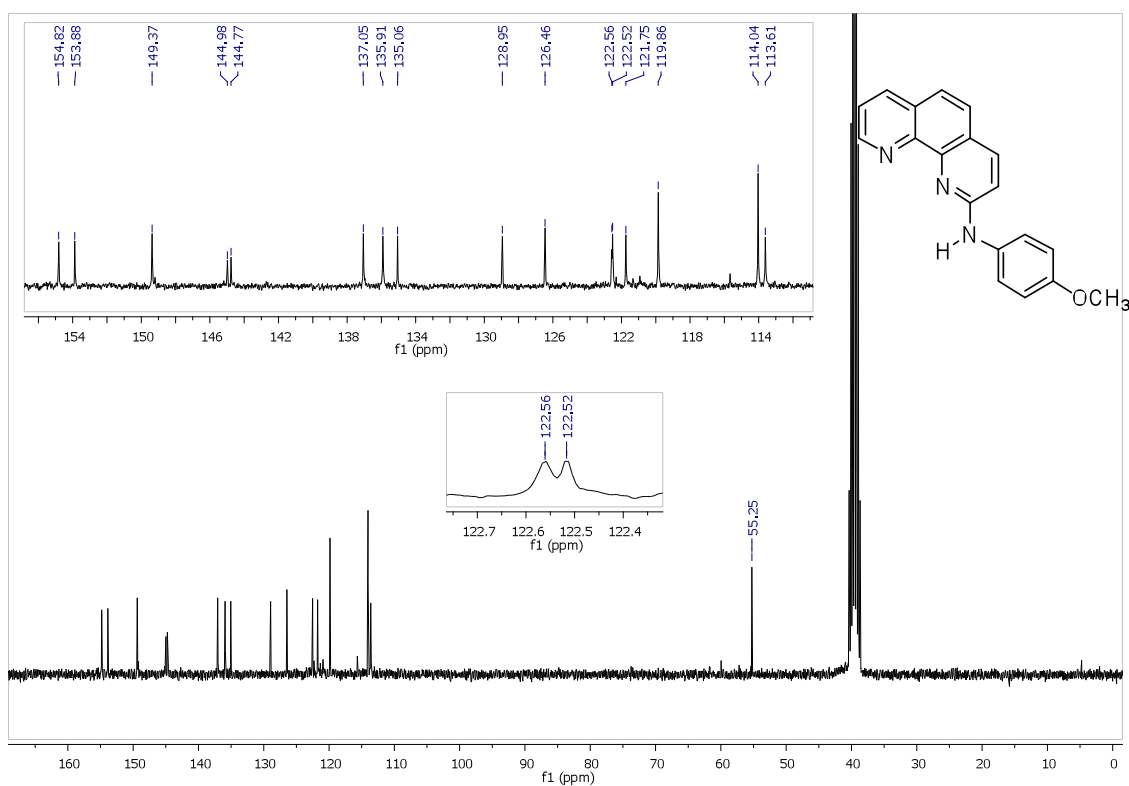

SI Figure 26:  $^{13}\text{C}$  NMR: *N*-(4-methoxyphenyl)-1,10-phenanthroline-2-amine (**3m**), (75 MHz,  $\text{DMSO-d}_6$ ).

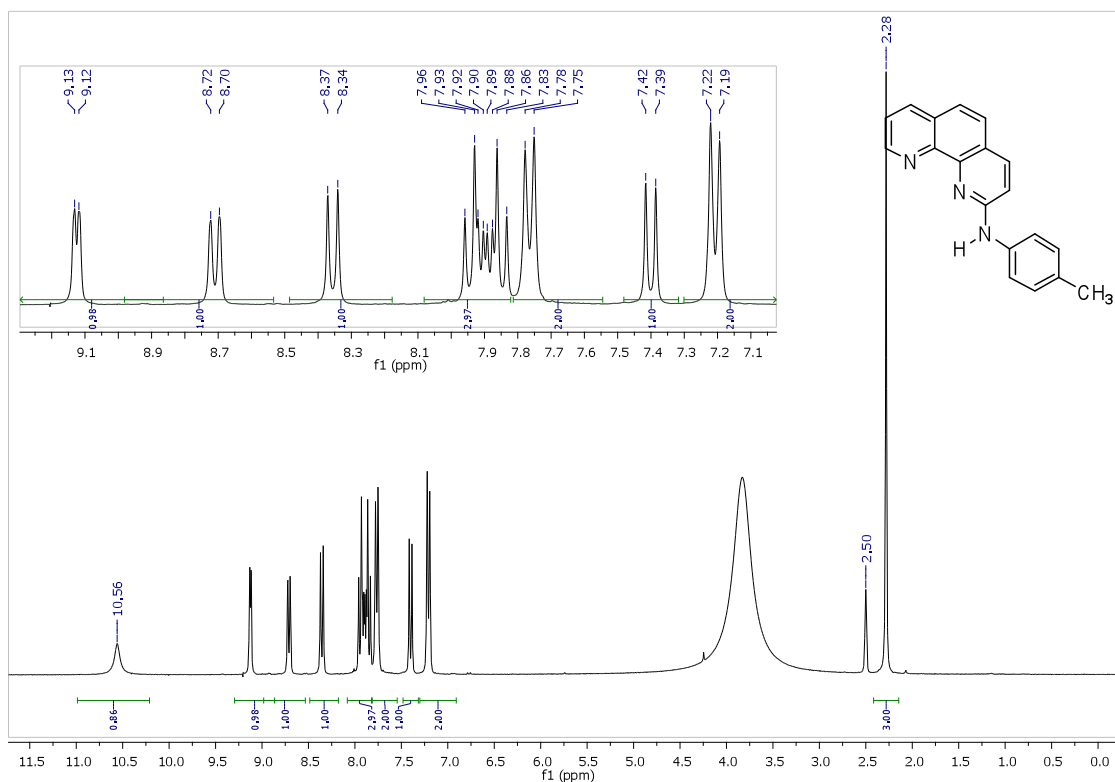

SI Figure 27: <sup>1</sup>H NMR: *N*-p-tolyl-1,10-phenanthroline-2-amine (**3n**), (300 MHz, DMSO-d<sub>6</sub>).

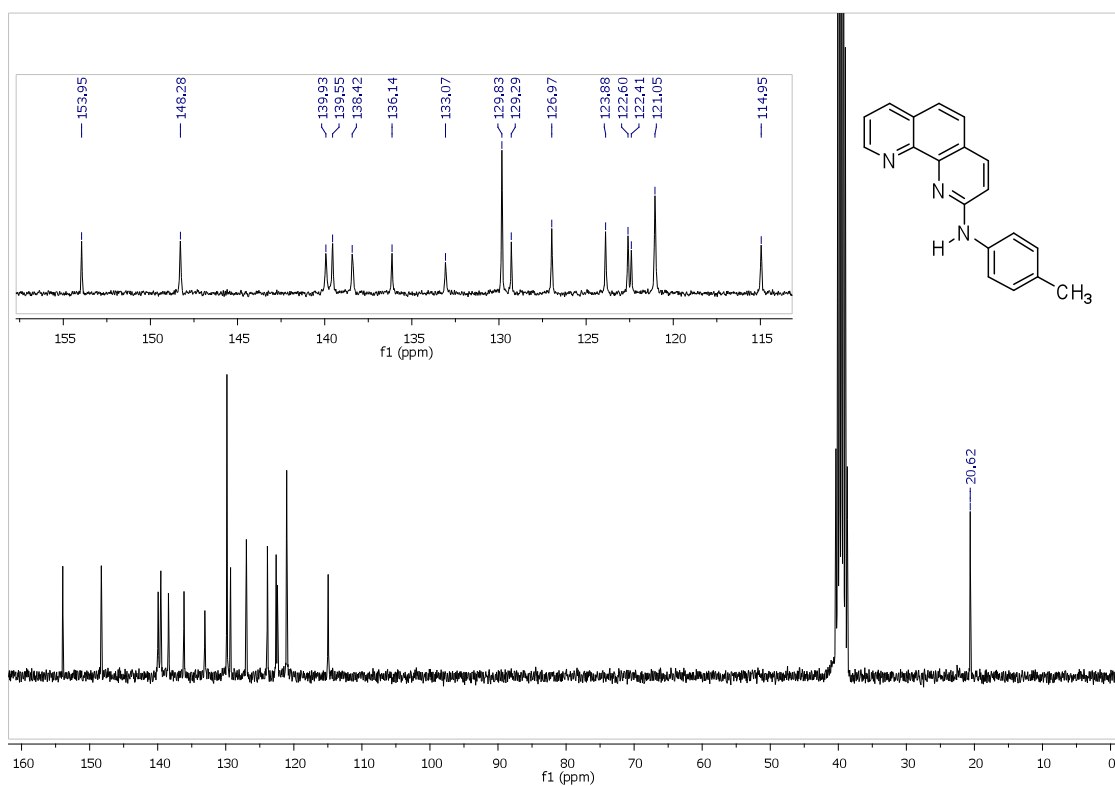

SI Figure 28: <sup>13</sup>C NMR: *N*-p-tolyl-1,10-phenanthroline-2-amine (**3n**), (75 MHz, DMSO-d<sub>6</sub>).

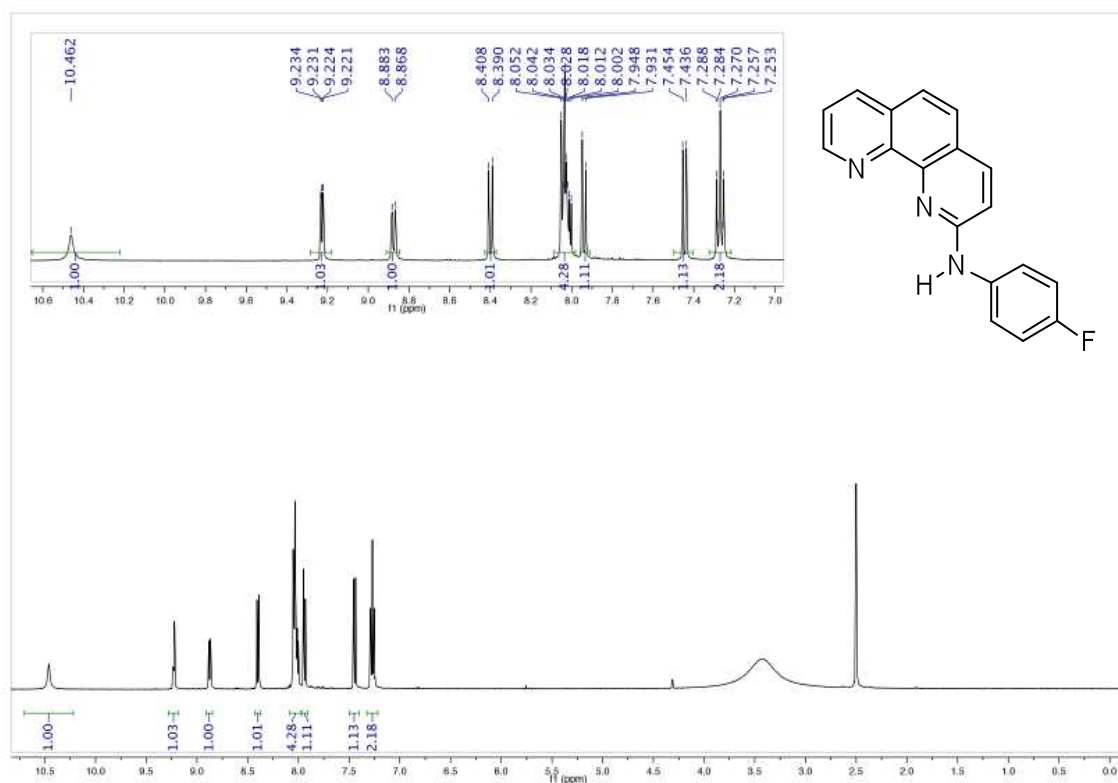

SI Figure 29: <sup>1</sup>H NMR: *N*-(4-fluorophenyl)-1,10-phenanthroline-2-amine (**30**), (200 MHz, DMSO-d<sub>6</sub>).

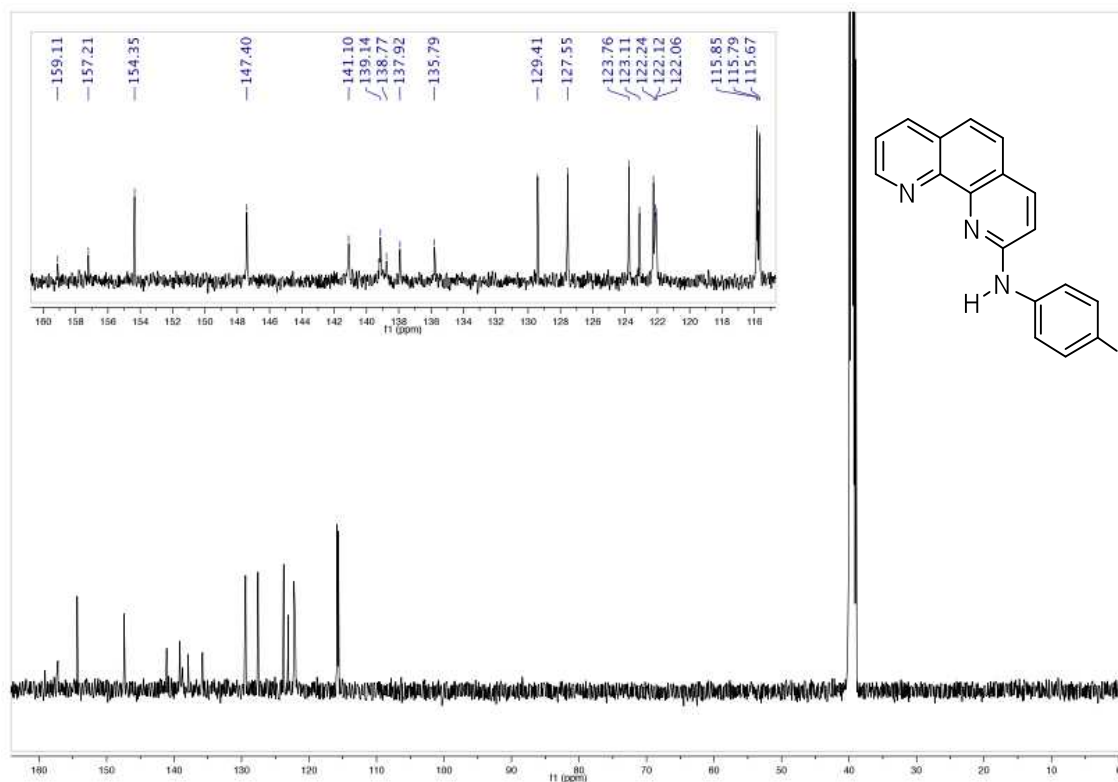

SI Figure 30: <sup>13</sup>C NMR: *N*-(4-fluorophenyl)-1,10-phenanthroline-2-amine (**30**), (50 MHz, DMSO-d<sub>6</sub>).



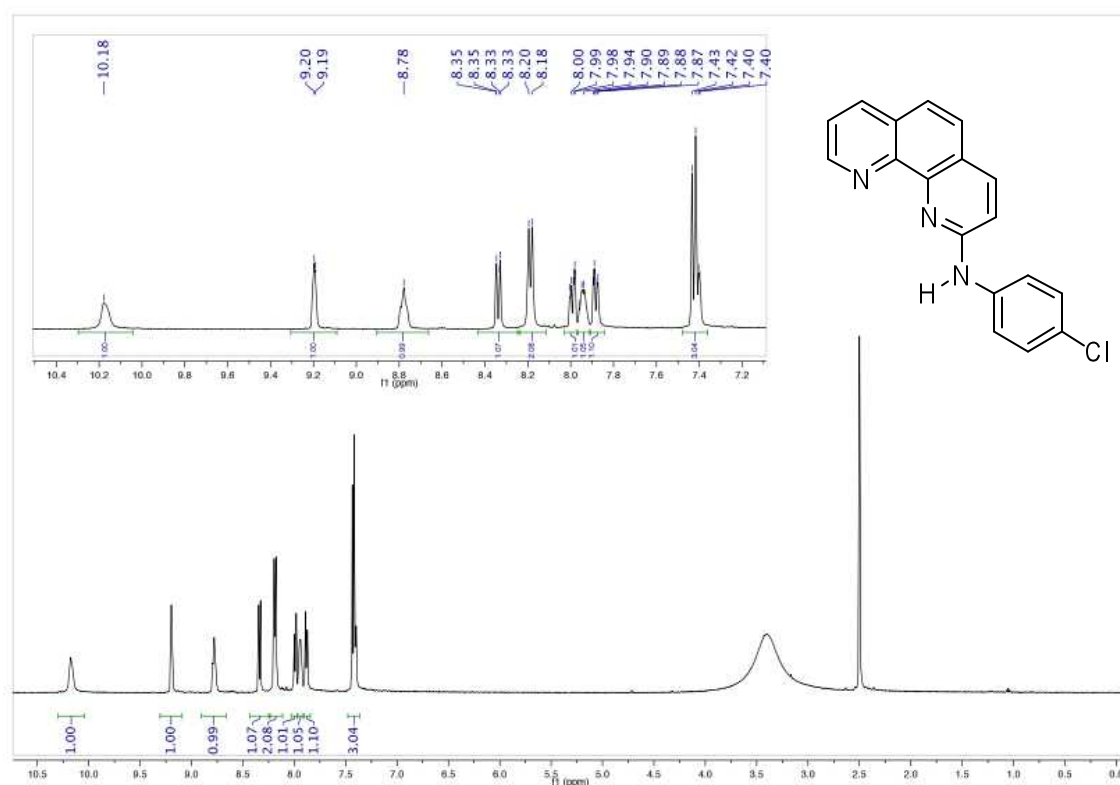

SI Figure 31: <sup>1</sup>H NMR: *N*-(4-chlorophenyl)-1,10-phenanthroline-2-amine (**3p**), (300 MHz, DMSO-d<sub>6</sub>).

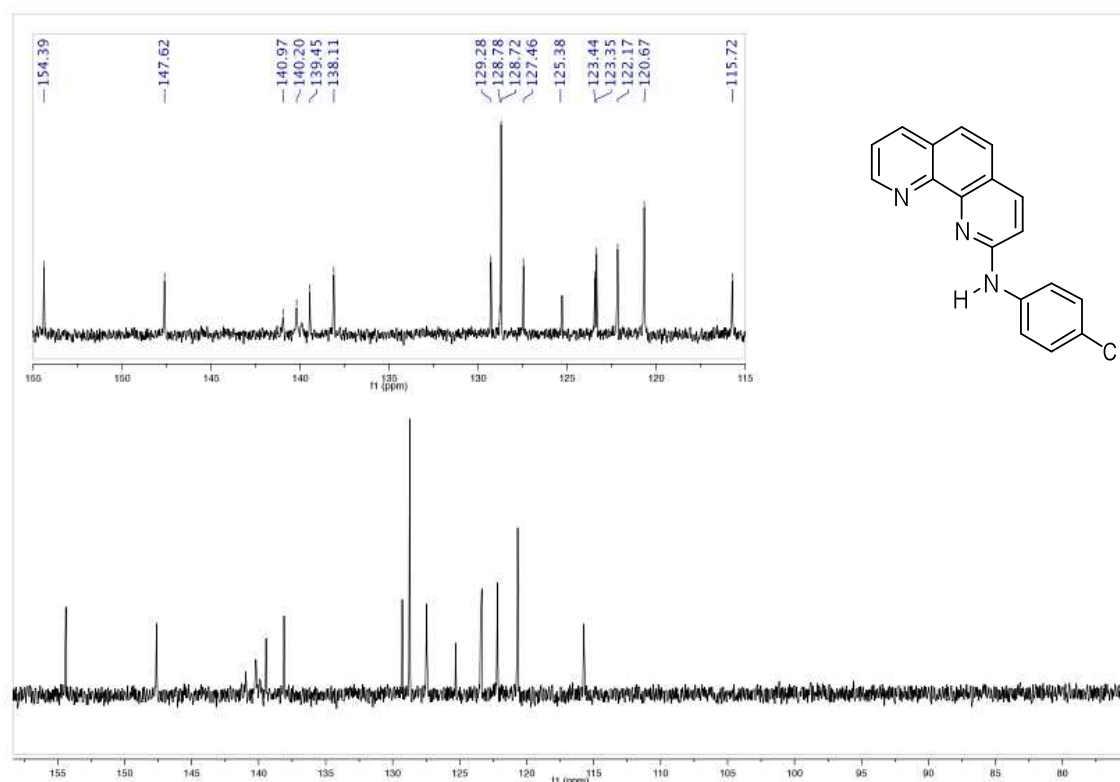

SI Figure 32: <sup>13</sup>C NMR: *N*-(4-chlorophenyl)-1,10-phenanthroline-2-amine (**3p**), (75 MHz, DMSO-d<sub>6</sub>).

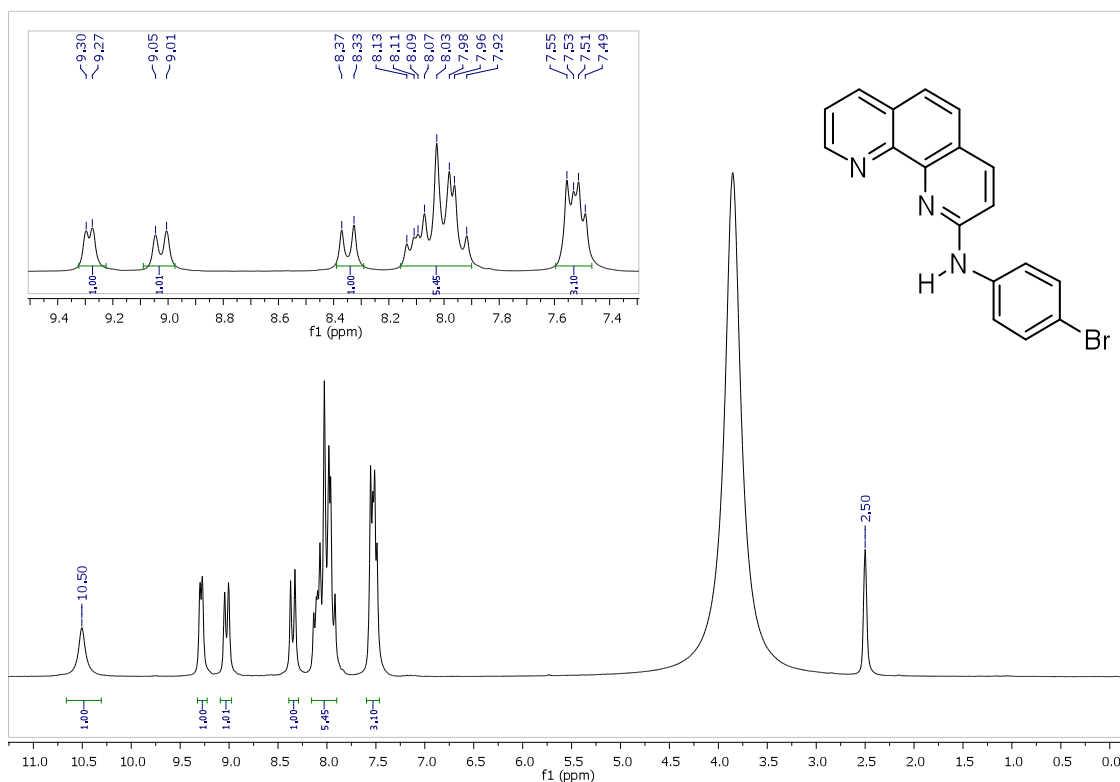

SI Figure 33: <sup>1</sup>H NMR: *N*-(4-bromophenyl)-1,10-phenanthroline-2-amine (**3q**), (200 MHz, DMSO-d<sub>6</sub>).

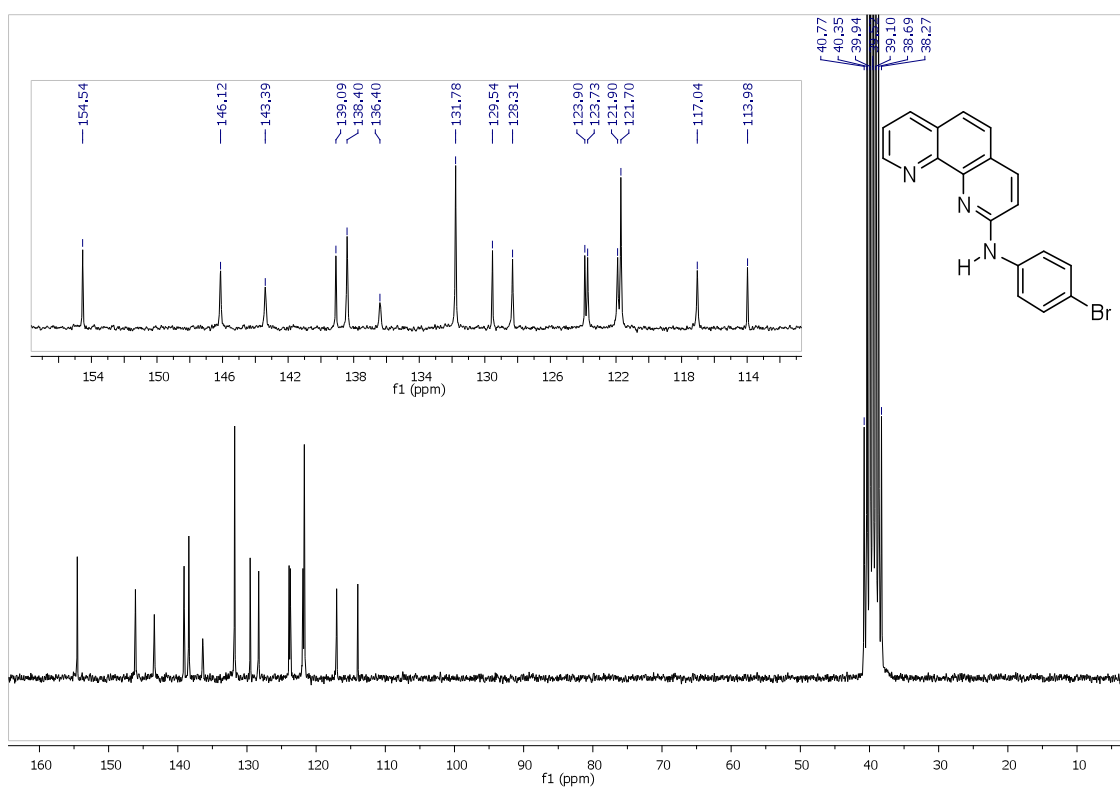

SI Figure 34: <sup>13</sup>C NMR: *N*-(4-bromophenyl)-1,10-phenanthroline-2-amine (**3q**) (50 MHz, DMSO-d<sub>6</sub>).

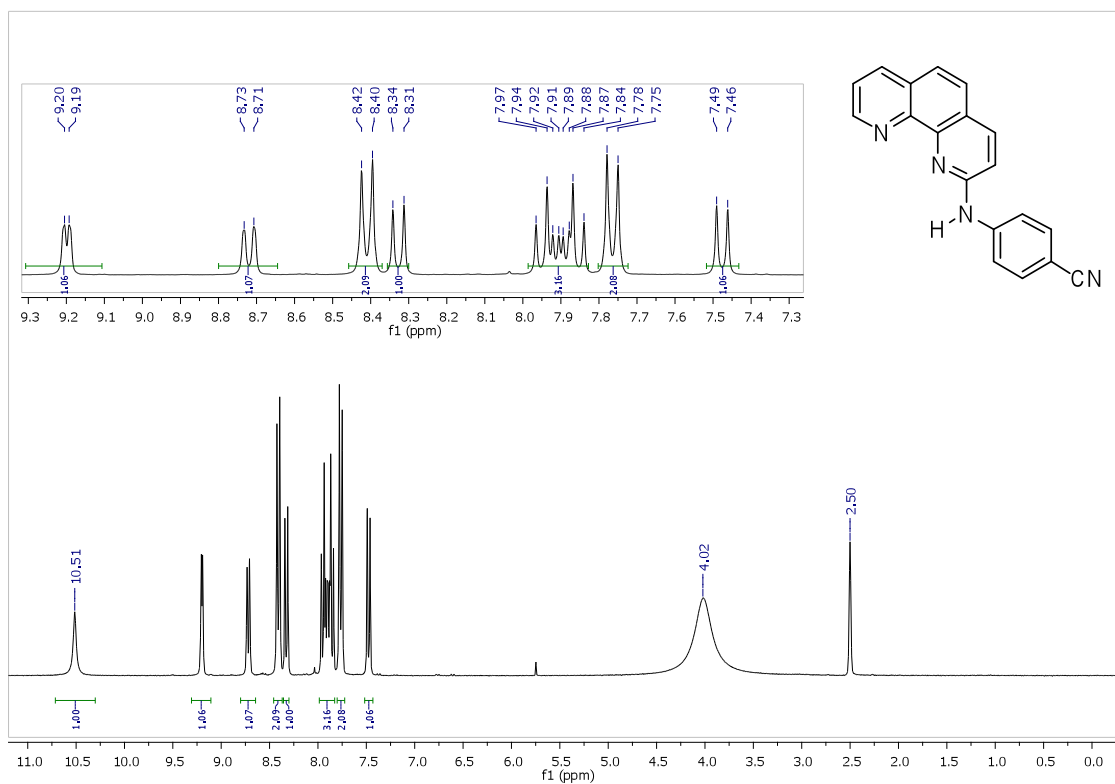

SI Figure 35: <sup>1</sup>H NMR: 4-(1,10-phenanthrolin-2-ylamino)benzonitrile (**3r**), (300 MHz, DMSO-d<sub>6</sub>).

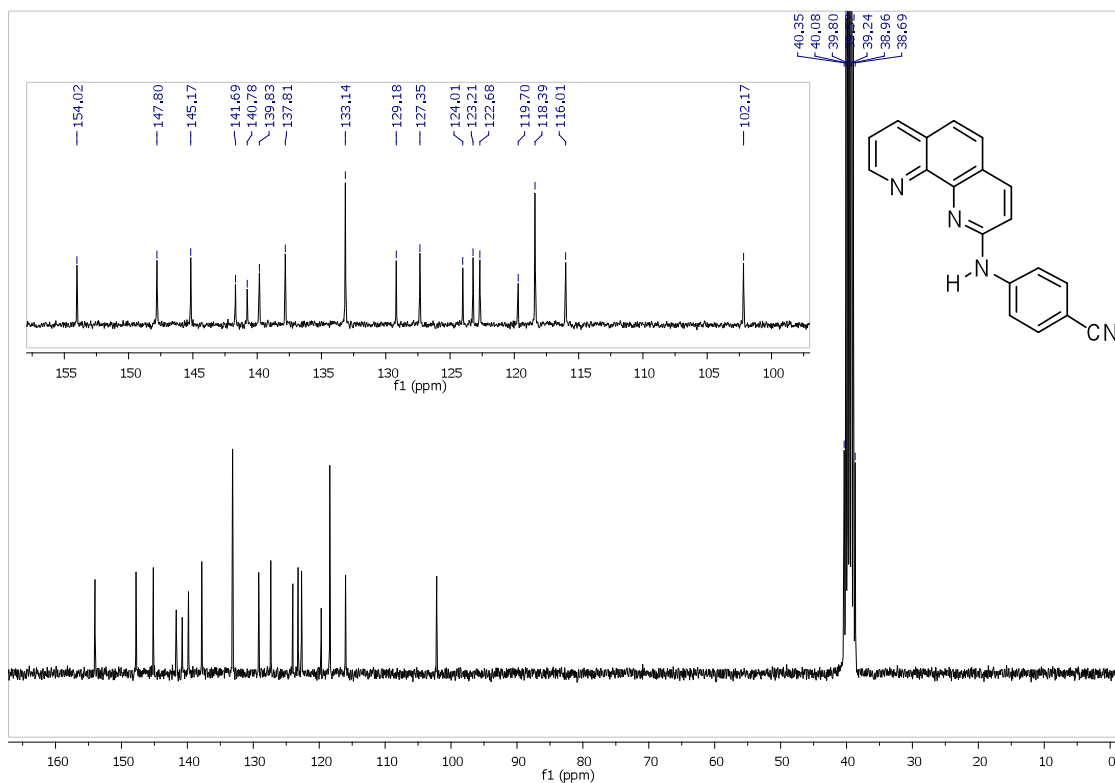

SI Figure 36: <sup>13</sup>C NMR: 4-(1,10-phenanthrolin-2-ylamino)benzonitrile (**3r**), (75 MHz, DMSO-d<sub>6</sub>).

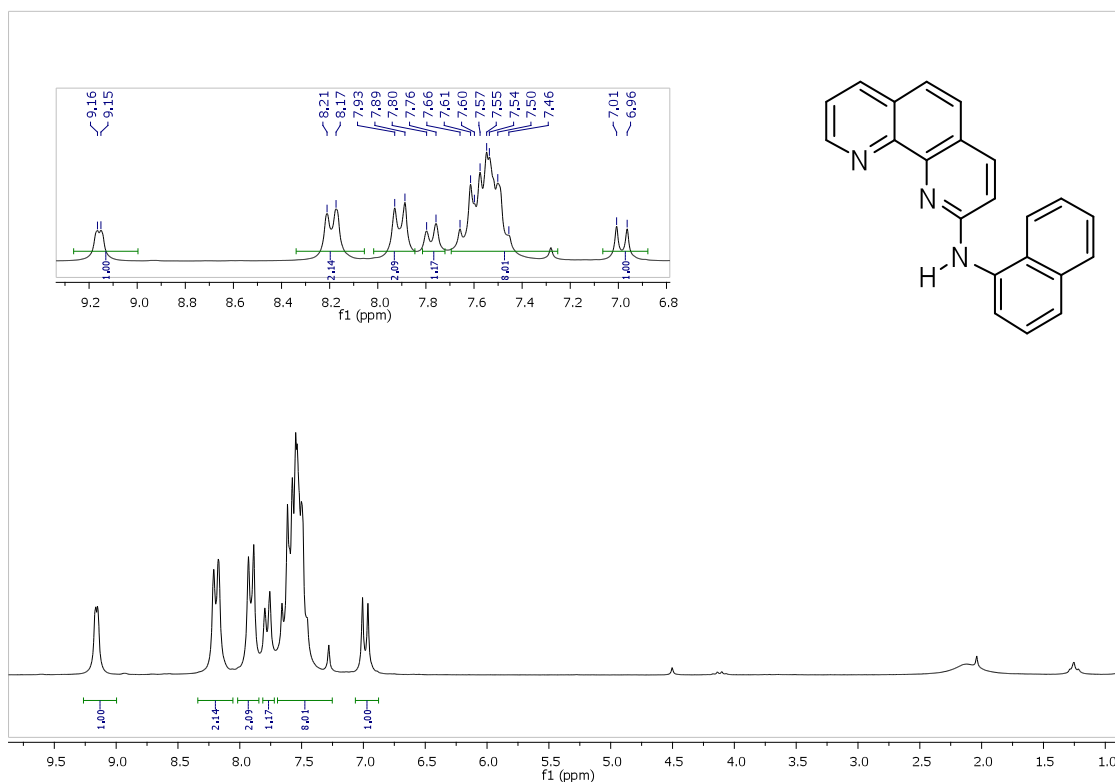

SI Figure 37: <sup>1</sup>H NMR: *N*-(naphthalen-1-yl)-1,10-phenanthroline-2-amine (**3s**) (200 MHz, CDCl<sub>3</sub>).

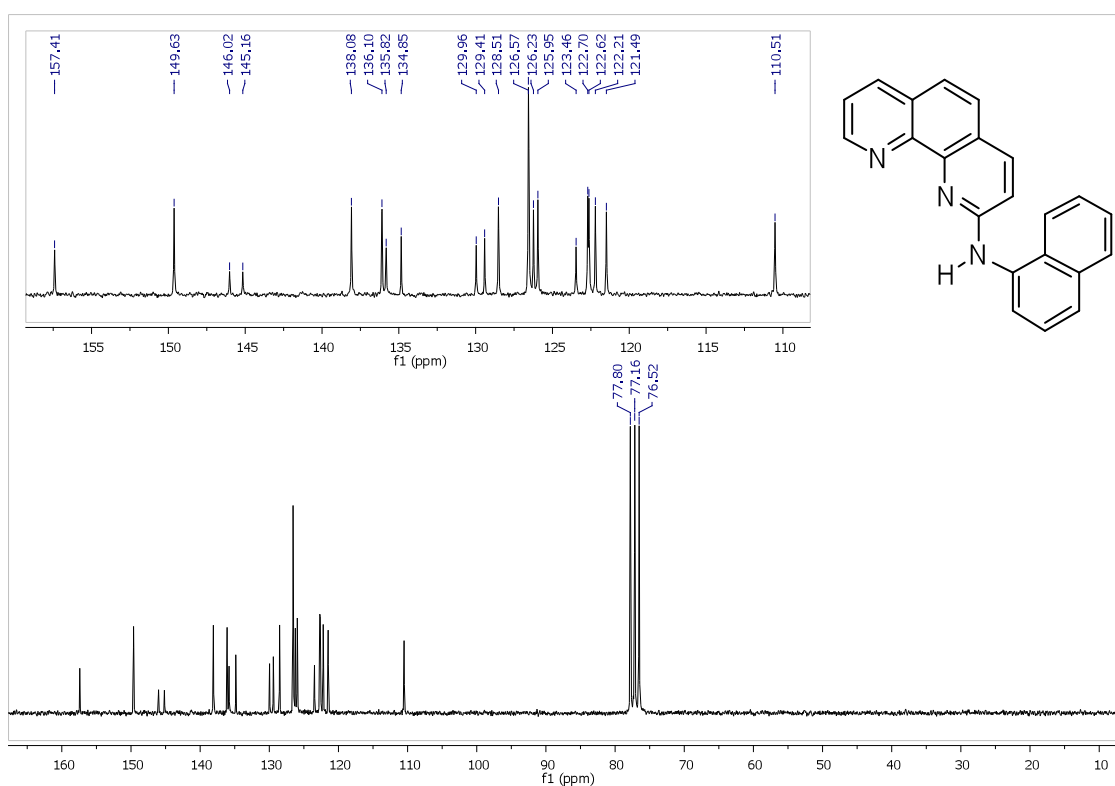

SI Figure 38: <sup>13</sup>C NMR: *N*-(naphthalen-1-yl)-1,10-phenanthroline-2-amine (**3s**), (50 MHz, CDCl<sub>3</sub>).

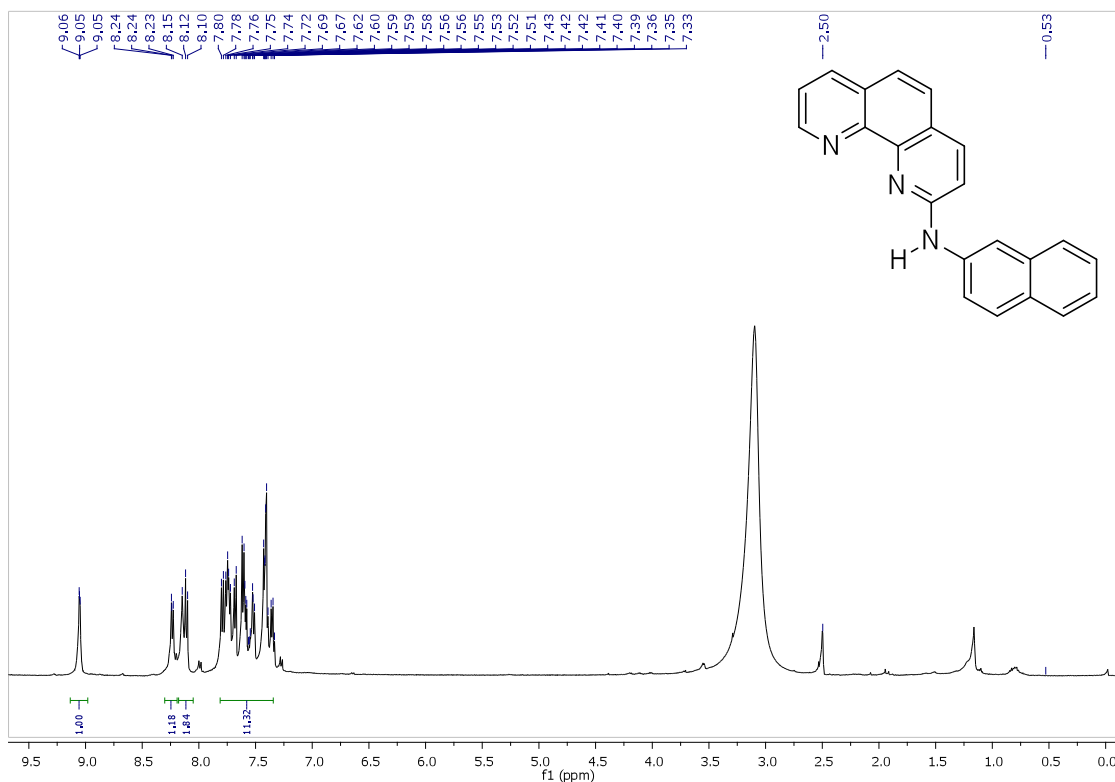

SI Figure 39: <sup>1</sup>H NMR: *N*-(naphthalen-2-yl)-1,10-phenanthroline-2-amine (**3t**), (500 MHz, DMSO-d<sub>6</sub>, CDCl<sub>3</sub>).

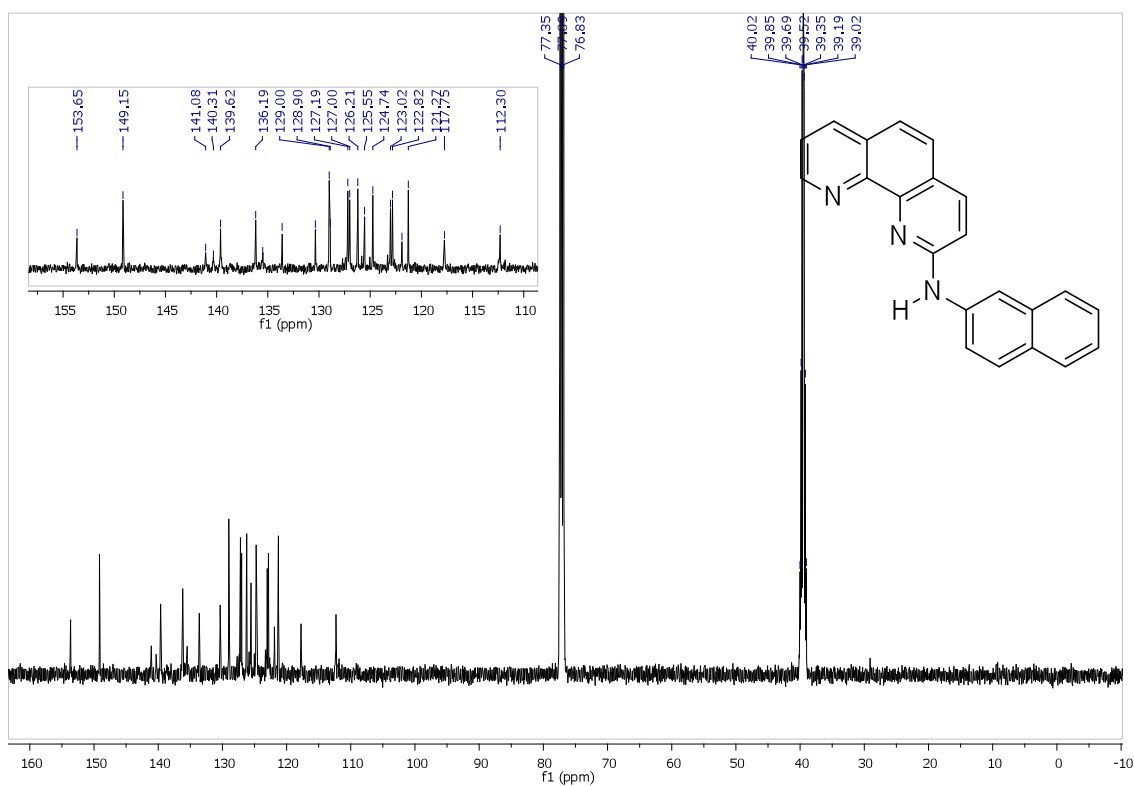

SI Figure 40: <sup>13</sup>C NMR: *N*-(naphthalen-2-yl)-1,10-phenanthroline-2-amine (**3t**), (125 MHz, DMSO-d<sub>6</sub>, CDCl<sub>3</sub>).

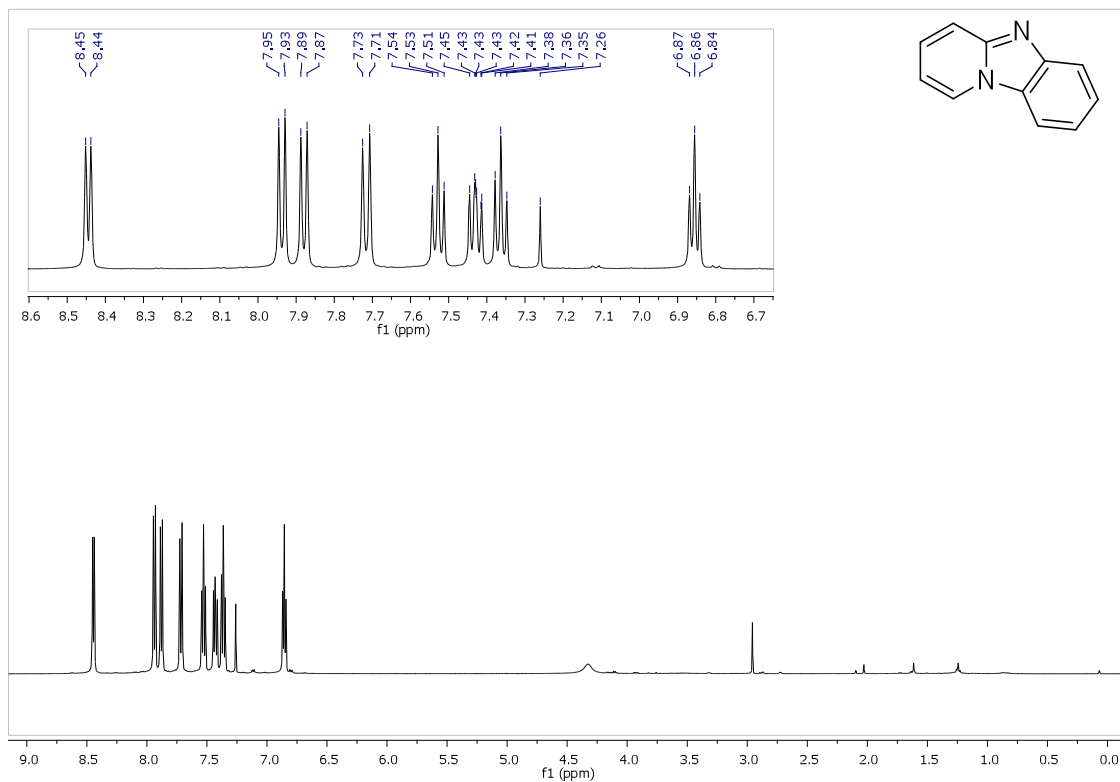

SI Figure 41: <sup>1</sup>H NMR: benzo[4,5]imidazo[1,2-*a*]pyridine (**5**), (500 MHz, CDCl<sub>3</sub>).

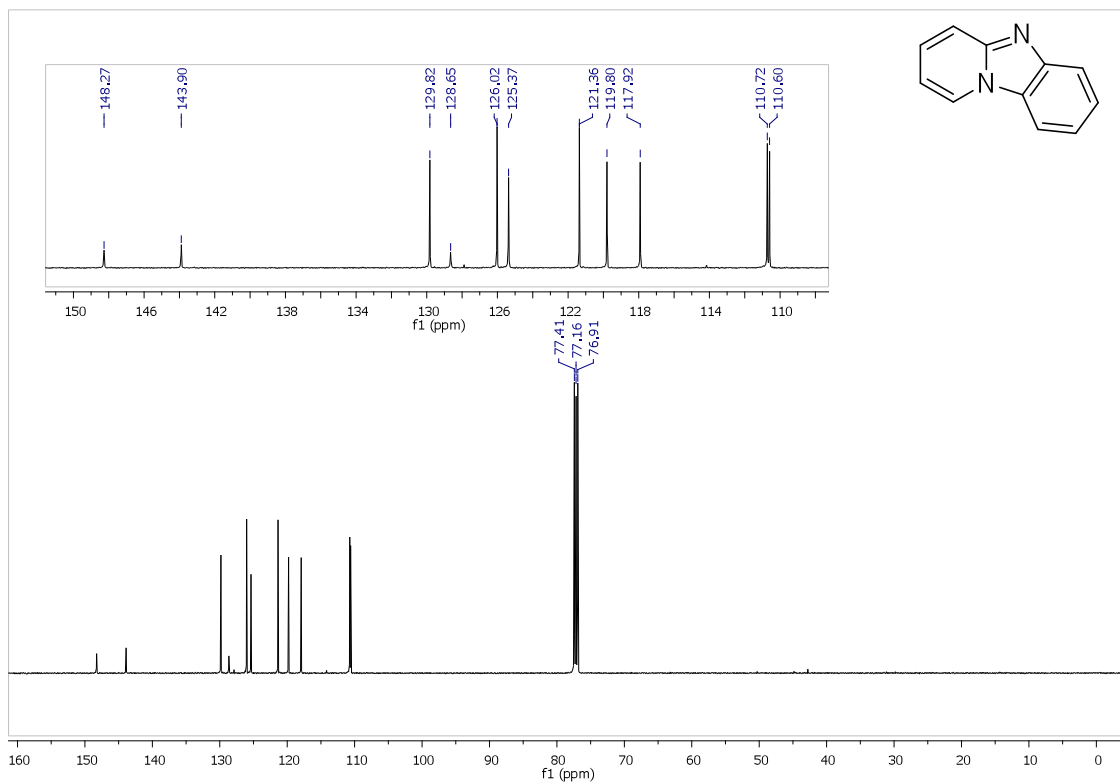

SI Figure 42: <sup>13</sup>C NMR: benzo[4,5]imidazo[1,2-*a*]pyridine (**5**), (125 MHz, CDCl<sub>3</sub>).

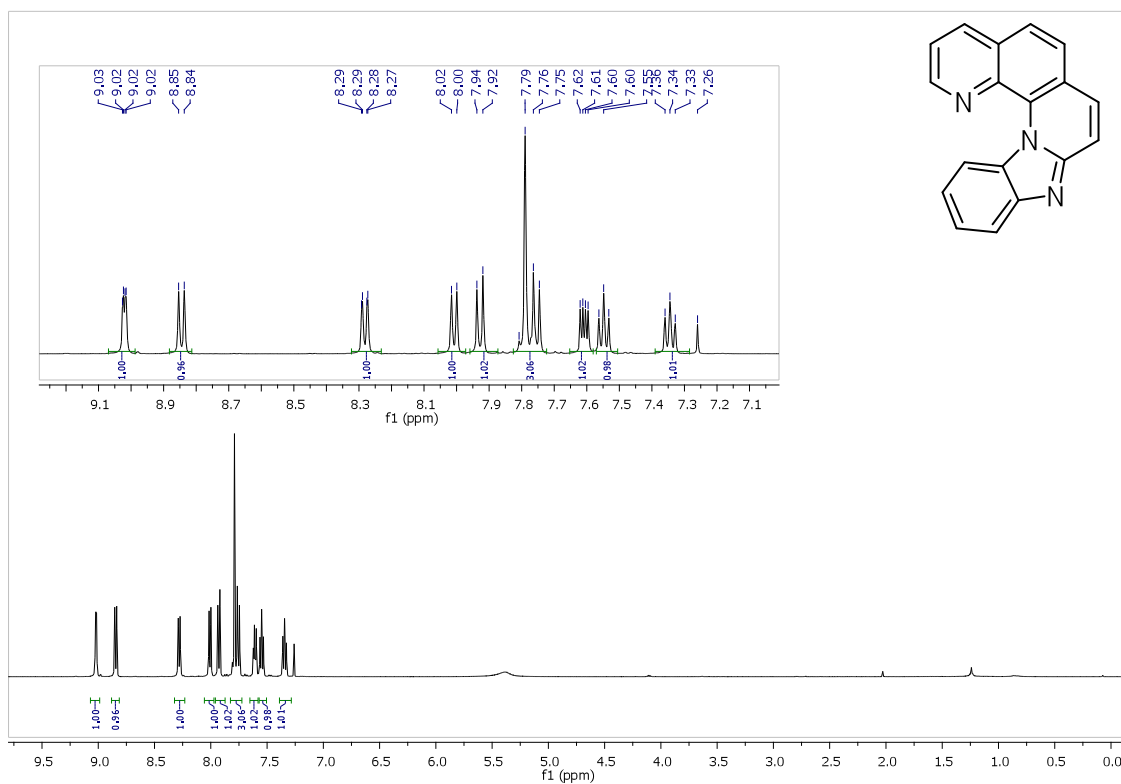

SI Figure 43: <sup>1</sup>H NMR: benzo[4,5]imidazo[1,2-a][1,10]phenanthroline (**6a**), (500 MHz, CDCl<sub>3</sub>).

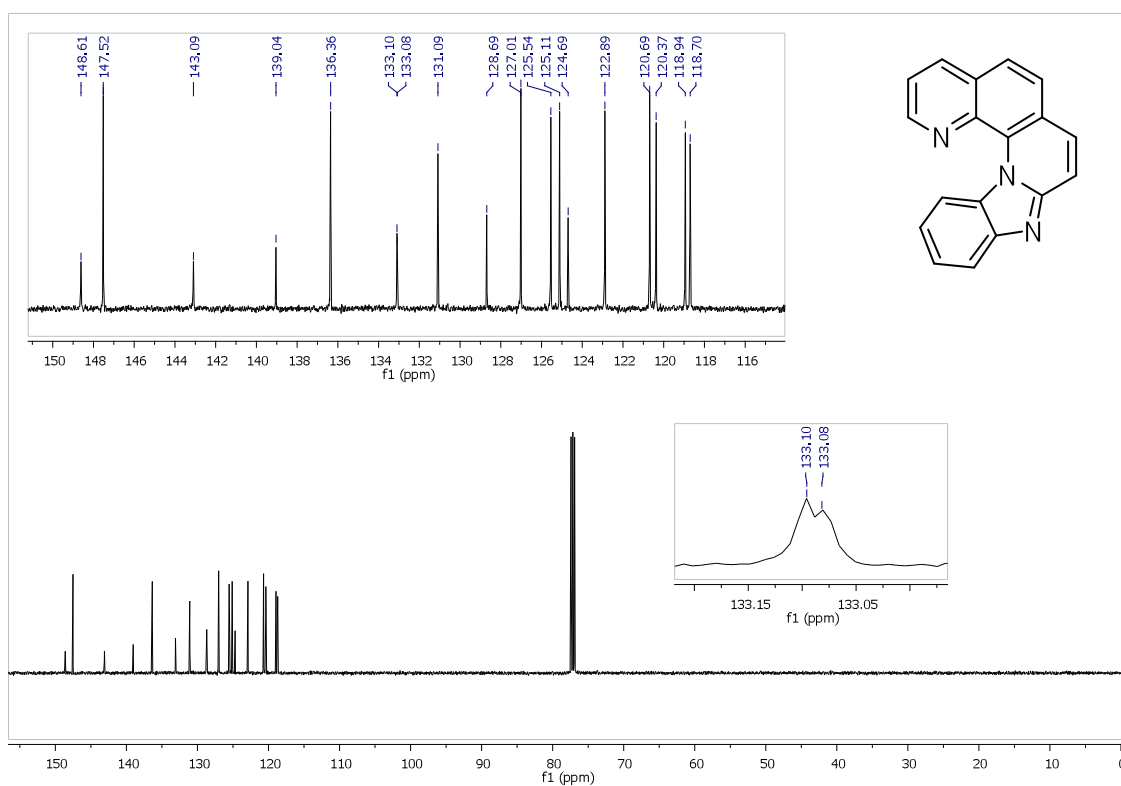

SI Figure 44: <sup>13</sup>C NMR: benzo[4,5]imidazo[1,2-a][1,10]phenanthroline (**6a**), (125 MHz, CDCl<sub>3</sub>).

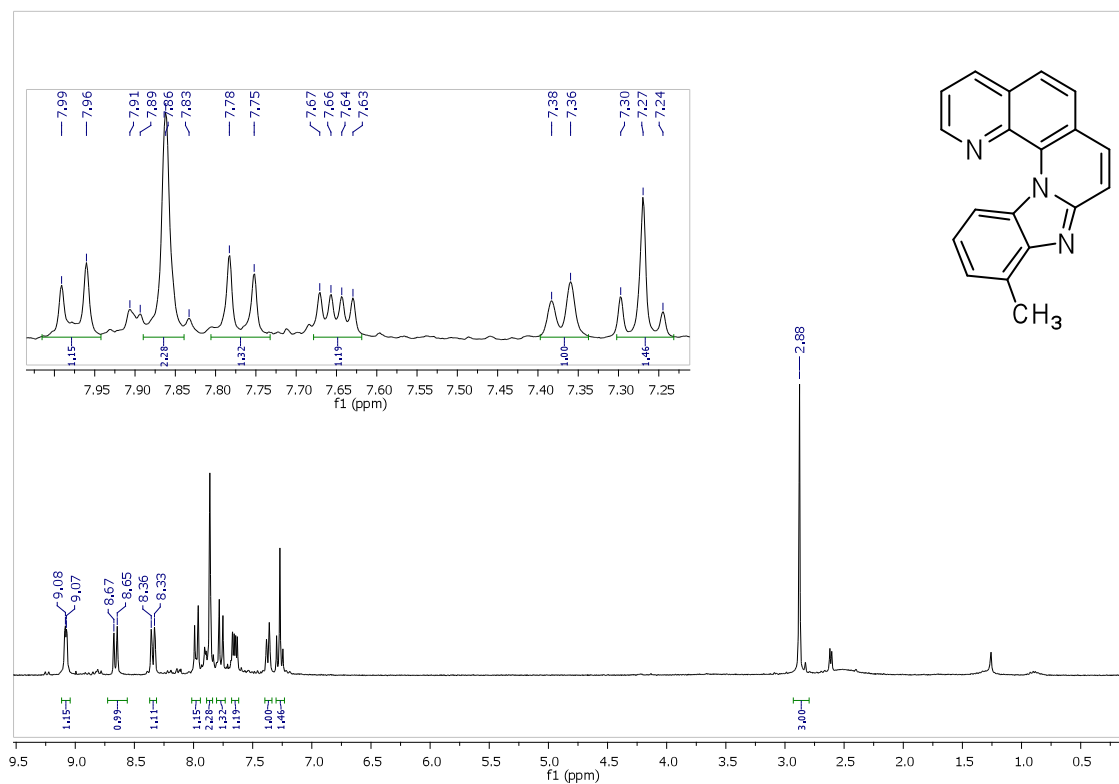

SI Figure 45: <sup>1</sup>H NMR: 12-methylbenzo[4,5]imidazo[1,2-*a*][1,10]phenanthroline (**6c**), (300 MHz, CDCl<sub>3</sub>).

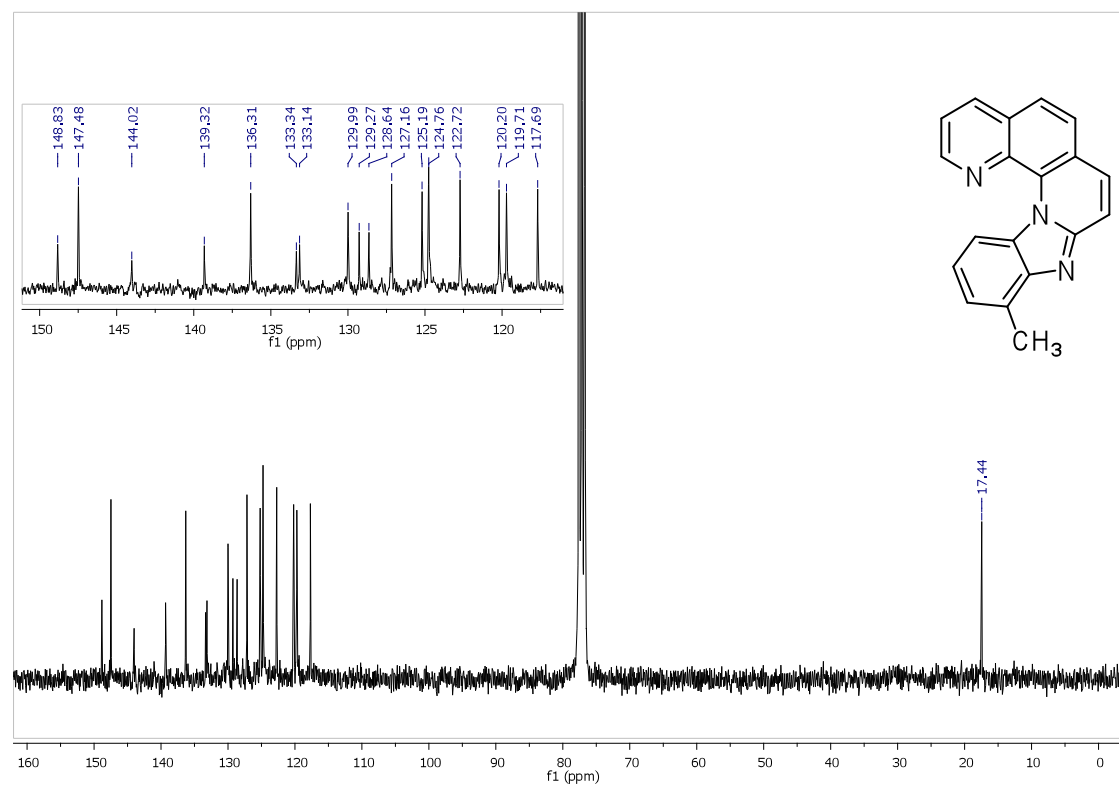

SI Figure 46: <sup>13</sup>C NMR: 12-methylbenzo[4,5]imidazo[1,2-*a*][1,10]phenanthroline (**6c**), (75 MHz, CDCl<sub>3</sub>).



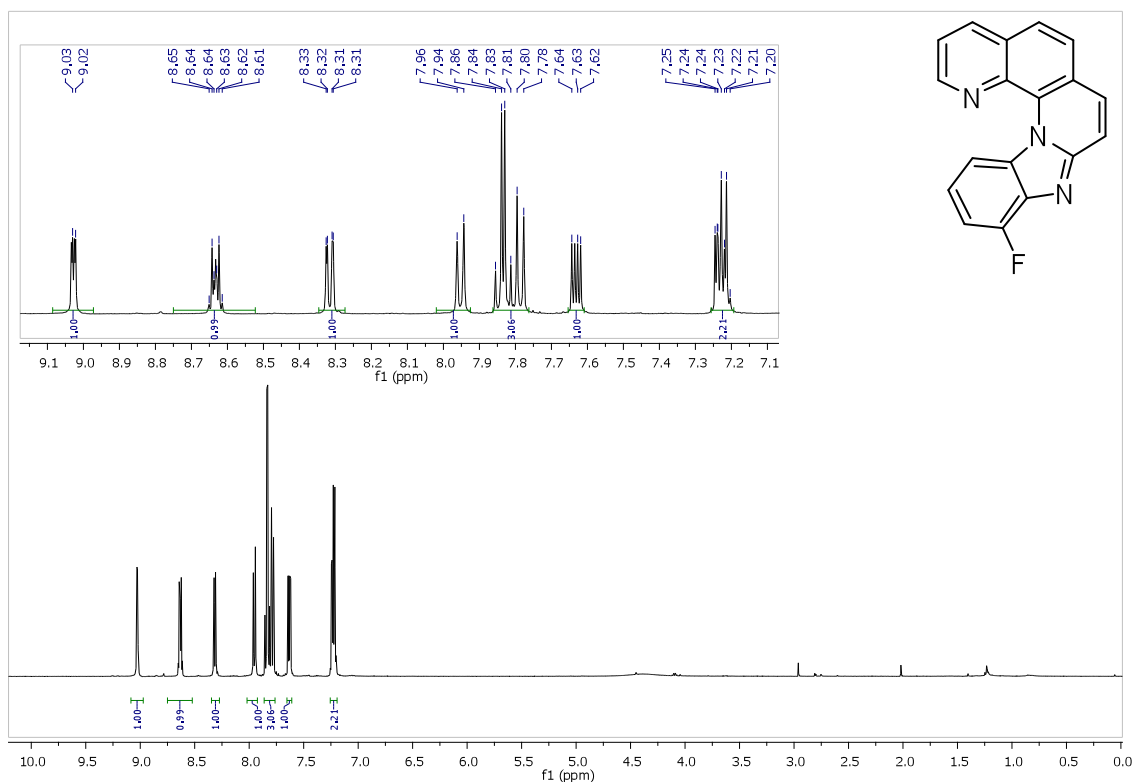

SI Figure 47: <sup>1</sup>H NMR: 12-fluorobenzo[4,5]imidazo[1,2-*a*][1,10]phenanthroline (**6d**), (500 MHz, CDCl<sub>3</sub>).

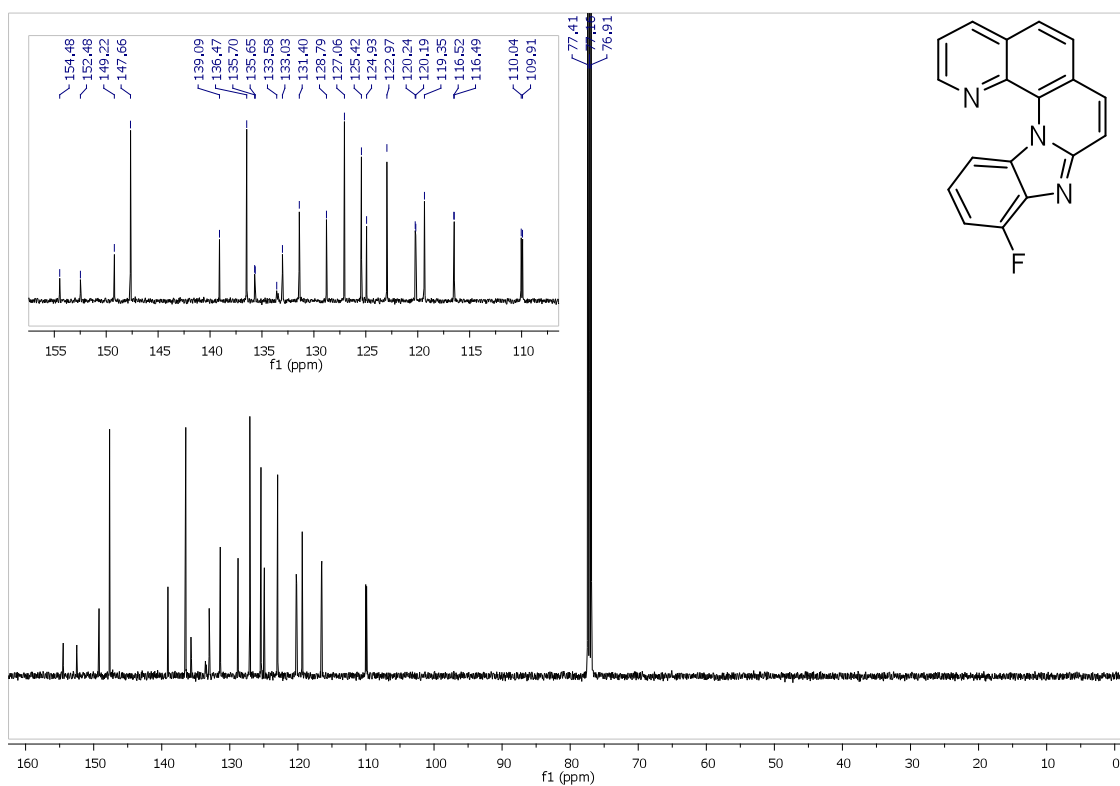

SI Figure 48: <sup>13</sup>C NMR: 12-fluorobenzo[4,5]imidazo[1,2-*a*][1,10]phenanthroline (**6d**), (125 MHz, CDCl<sub>3</sub>).

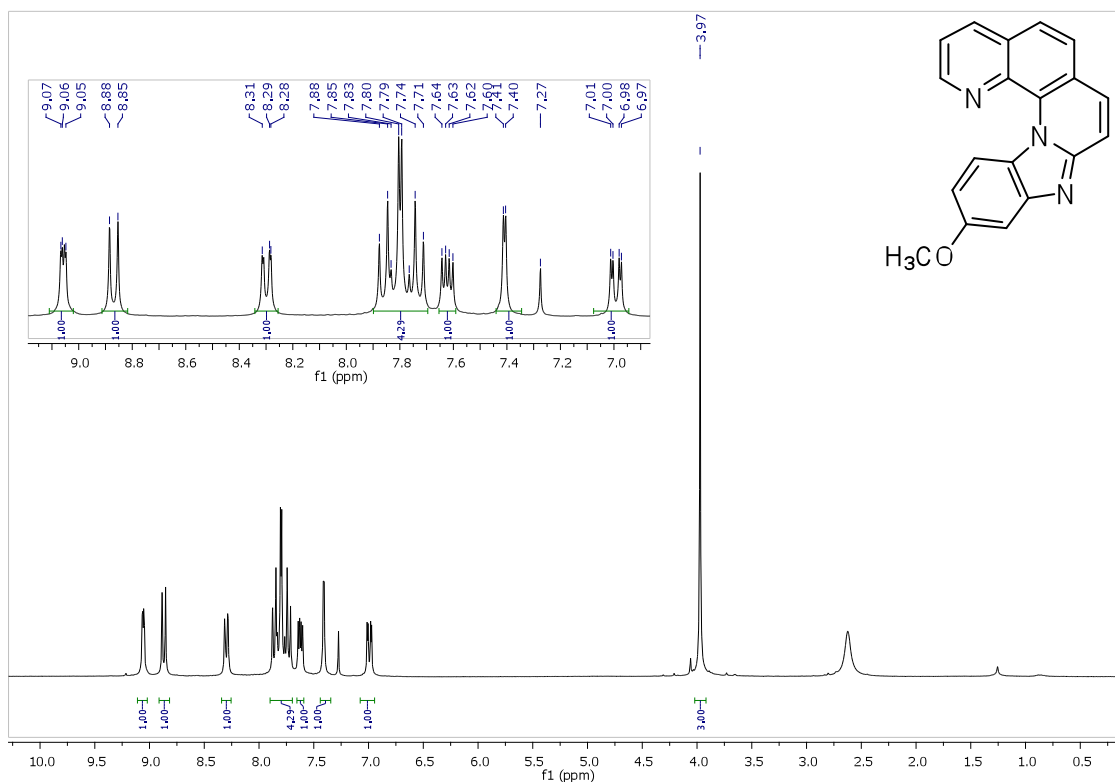

SI Figure 49: <sup>1</sup>H NMR: 13-methoxybenzo[4,5]imidazo[1,2-a][1,10]phenanthroline (**6f**), (300 MHz, CDCl<sub>3</sub>).

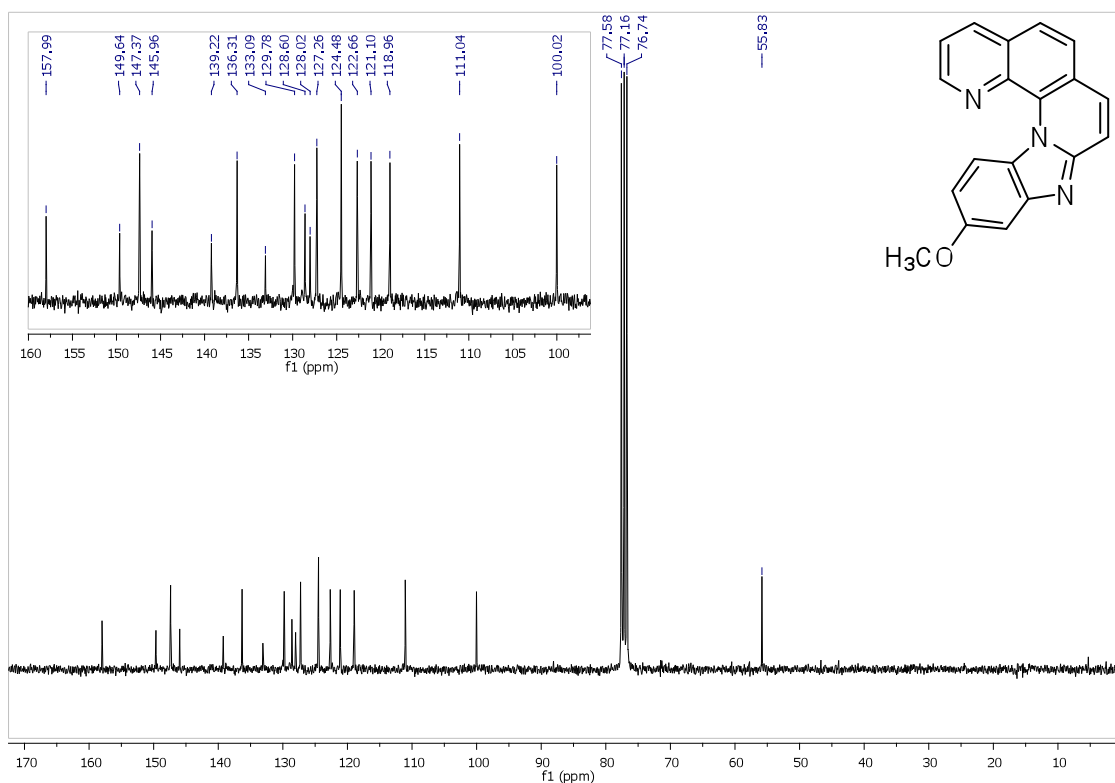

SI Figure 50: <sup>13</sup>C NMR: 13-methoxybenzo[4,5]imidazo[1,2-a][1,10]phenanthroline (**6f**), (75 MHz, CDCl<sub>3</sub>).

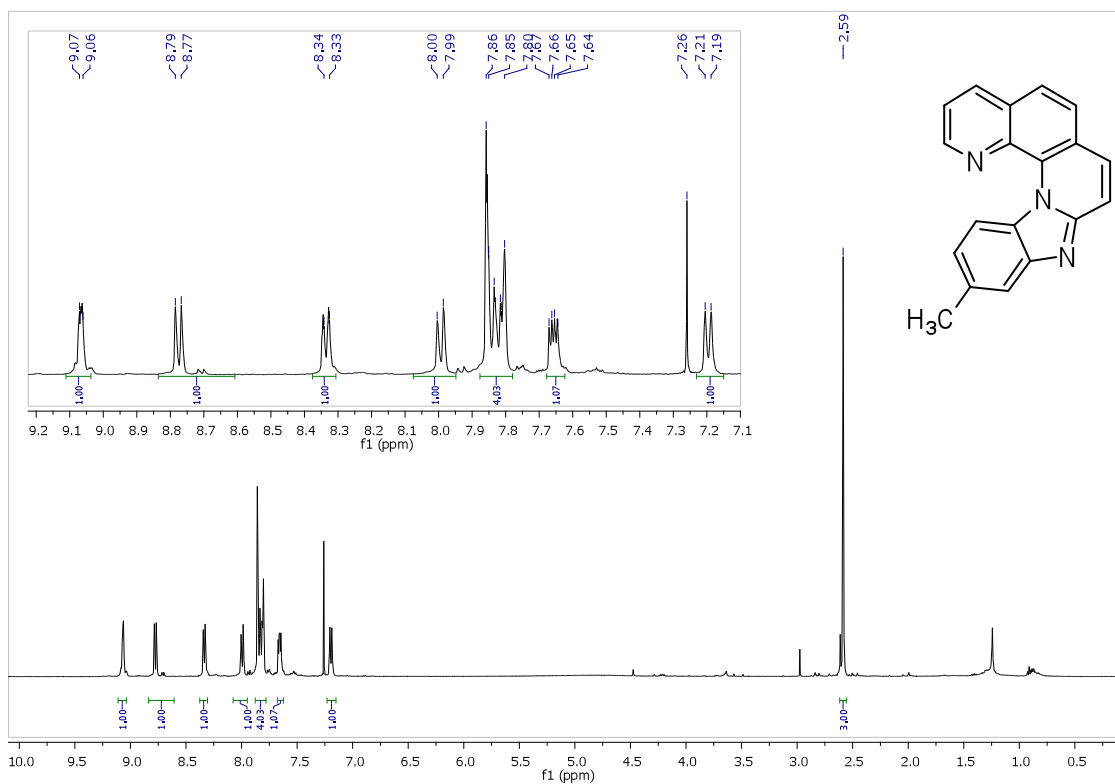

SI Figure 51: <sup>1</sup>H NMR: 13-methylbenzo[4,5]imidazo[1,2-a][1,10]phenanthroline (**6g**), (500 MHz, CDCl<sub>3</sub>).

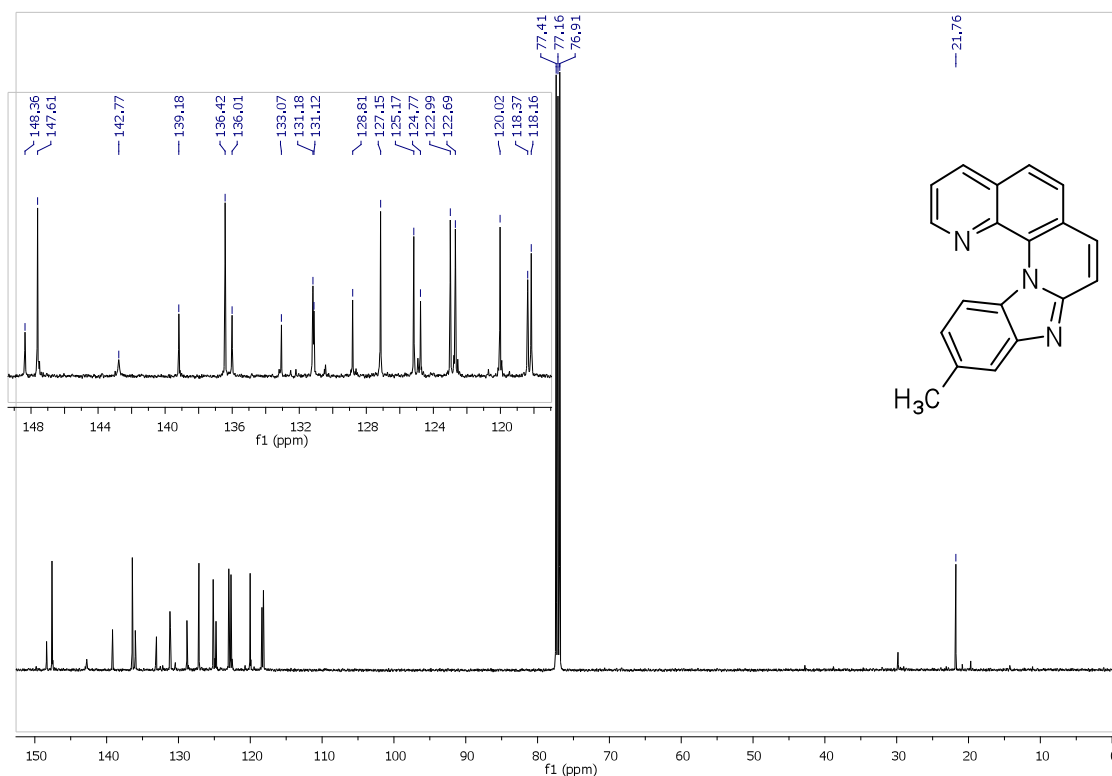

SI Figure 52: <sup>13</sup>C NMR: 13-methylbenzo[4,5]imidazo[1,2-a][1,10]phenanthroline (**6g**), (75 MHz, CDCl<sub>3</sub>).

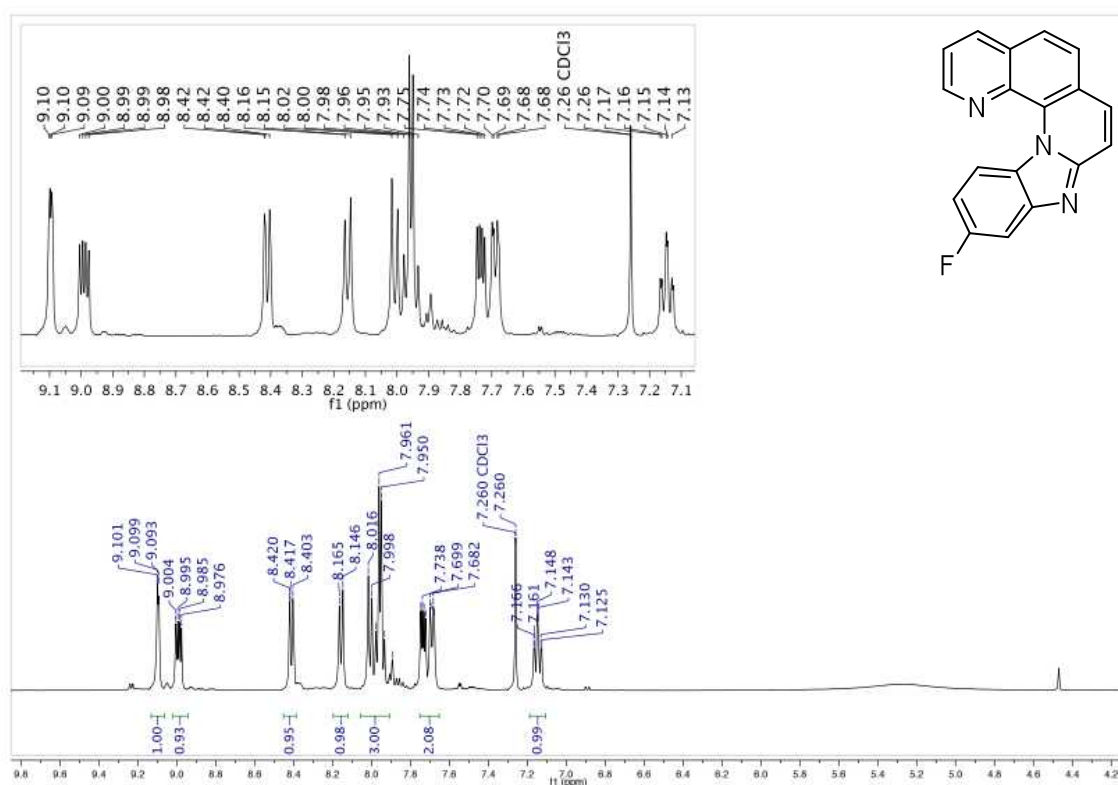

SI Figure 53: <sup>1</sup>H NMR: 13-fluorobenzo[4,5]imidazo[1,2-*a*][1,10]phenanthroline (**6h**), (500 MHz, CDCl<sub>3</sub>).

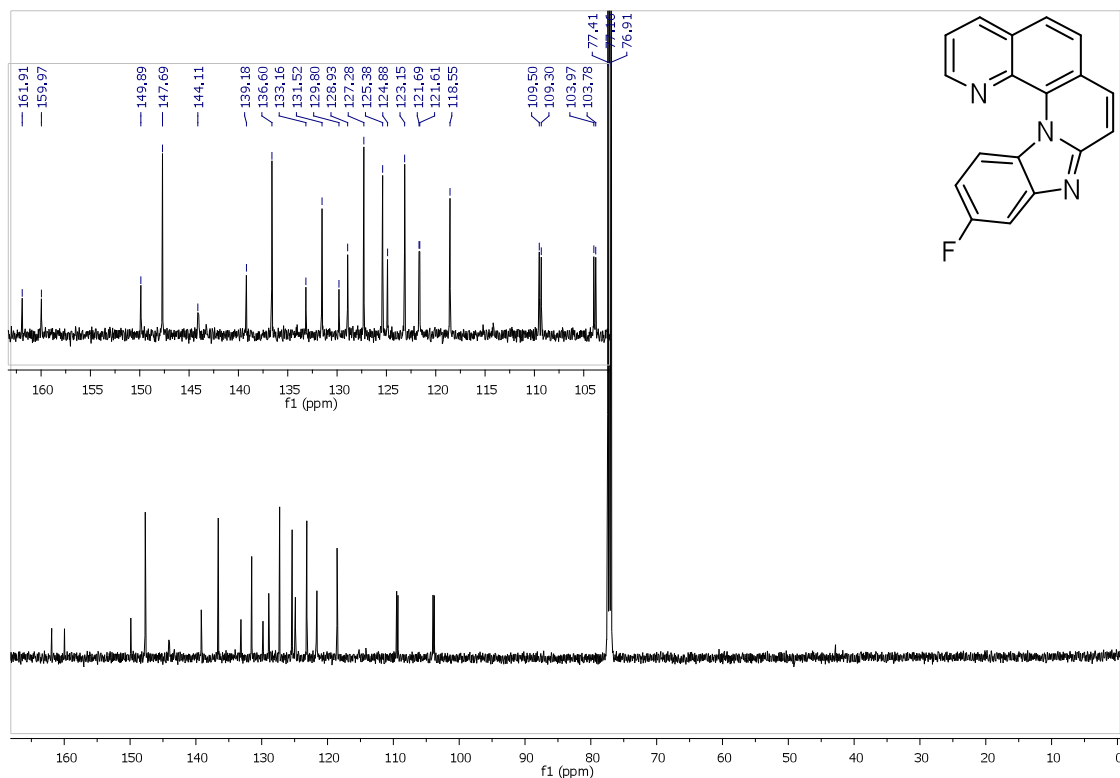

SI Figure 54: <sup>13</sup>C NMR: 13-fluorobenzo[4,5]imidazo[1,2-*a*][1,10]phenanthroline (**6h**), (125 MHz, CDCl<sub>3</sub>).

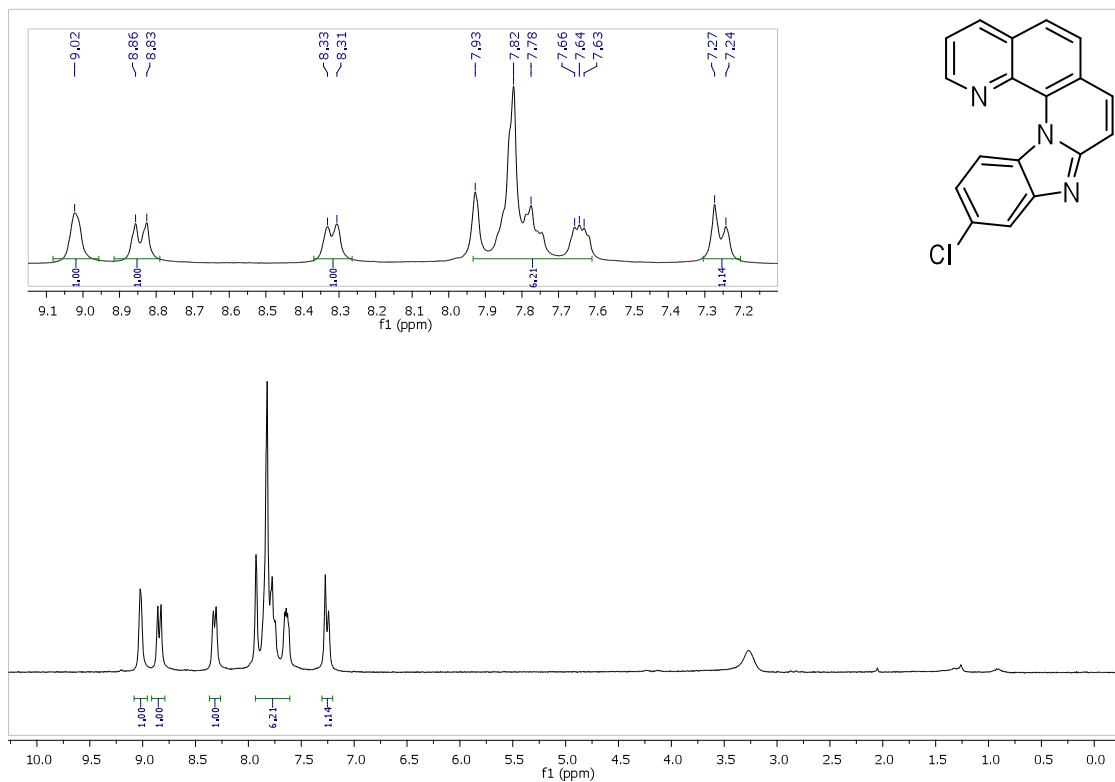

SI Figure 55: <sup>1</sup>H NMR: 13-chlorobenzo[4,5]imidazo[1,2-a][1,10]phenanthroline (**6i**), (300 MHz, CDCl<sub>3</sub>)

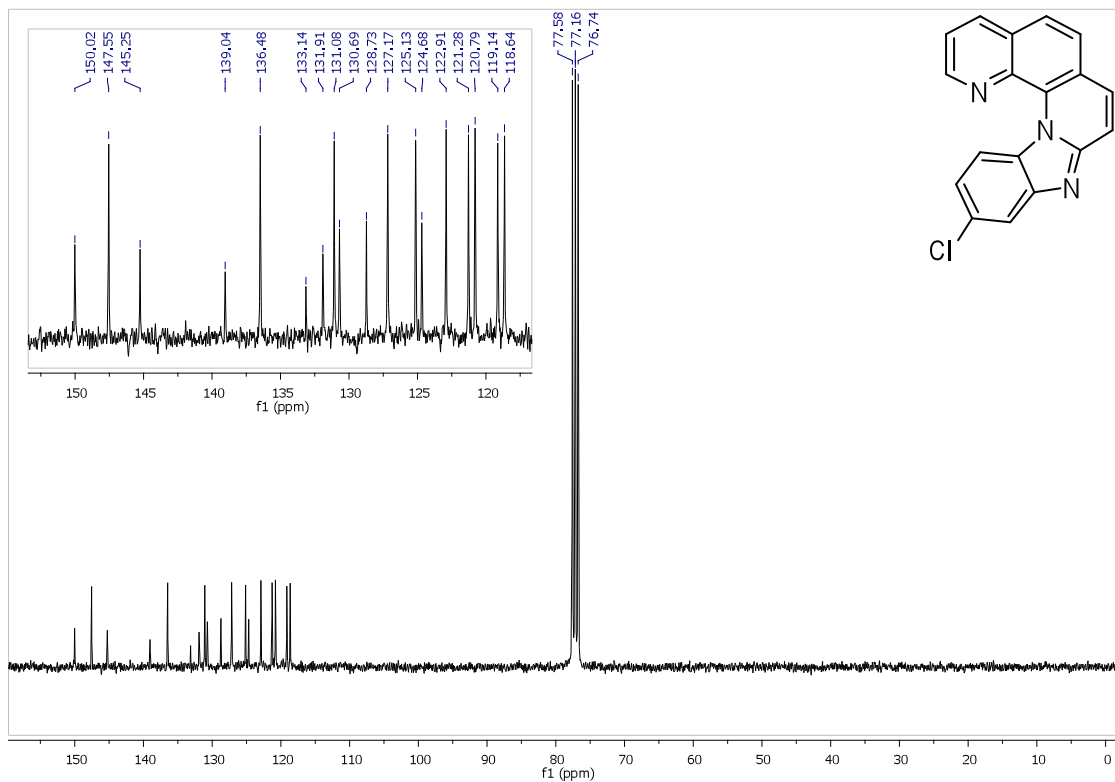

SI Figure 56: <sup>13</sup>C NMR: 13-chlorobenzo[4,5]imidazo[1,2-a][1,10]phenanthroline (**6i**), (75 MHz, CDCl<sub>3</sub>).

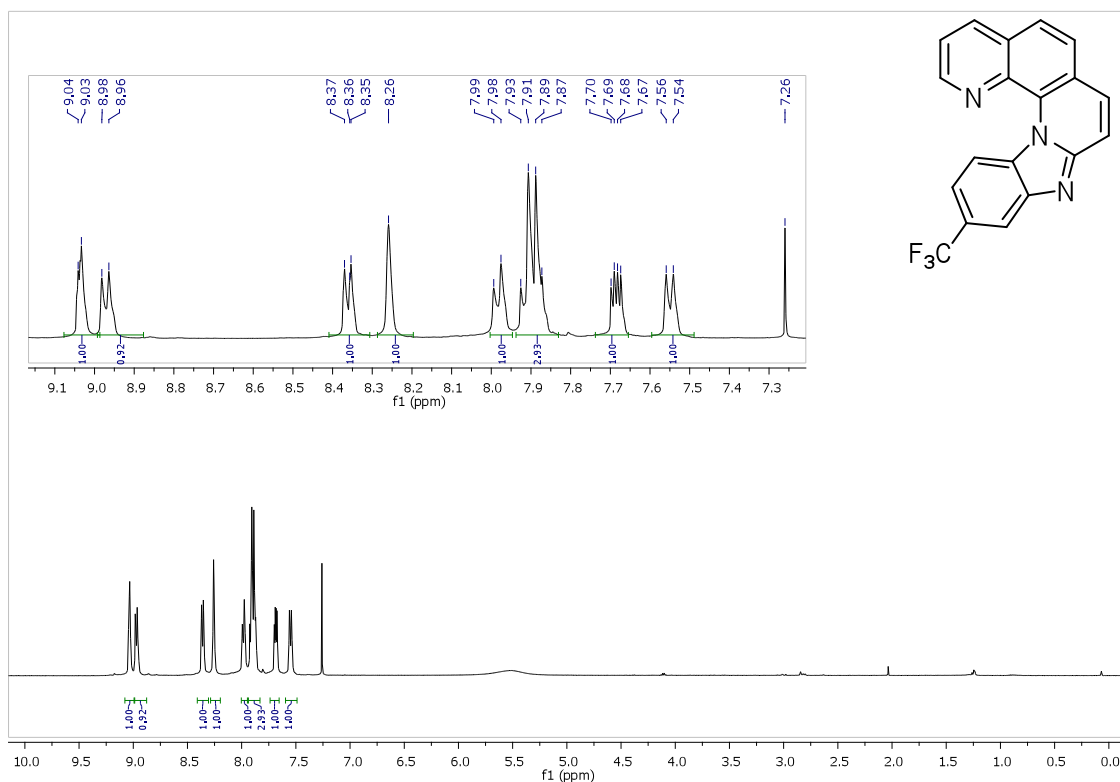

SI Figure 57: <sup>1</sup>H NMR: 13-(trifluoromethyl)benzo[4,5]imidazo[1,2-*a*][1,10]phenanthroline (**6j**), (500 MHz, CDCl<sub>3</sub>).

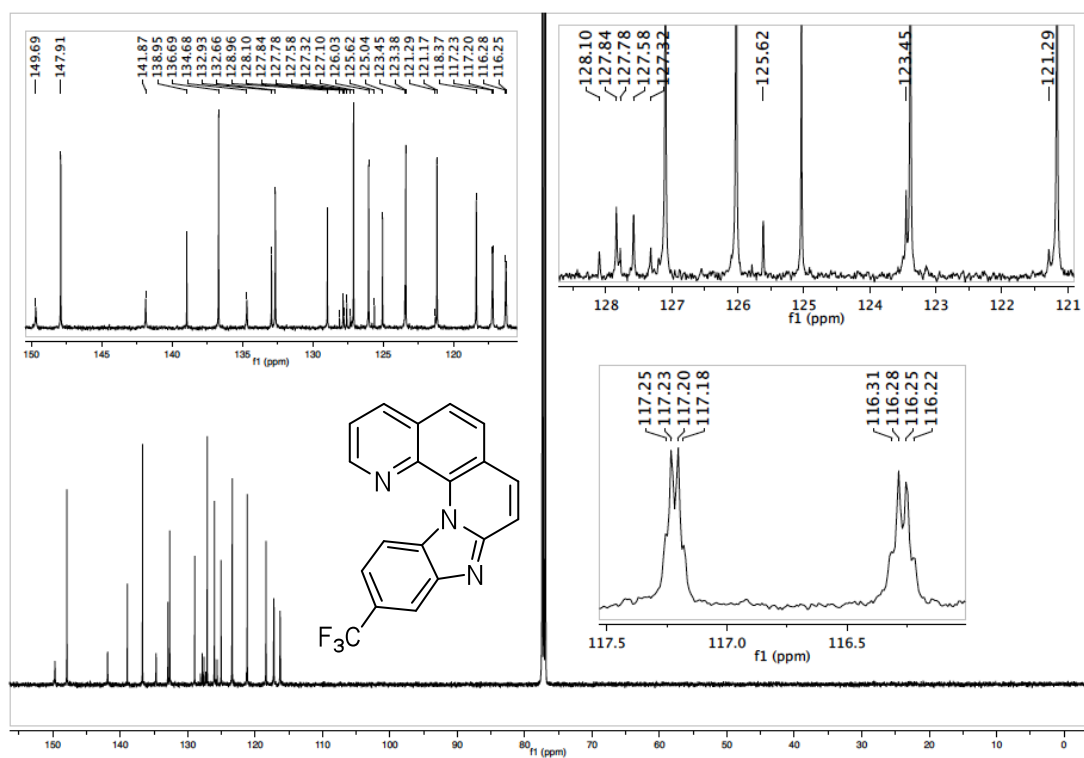

SI Figure 58: <sup>13</sup>C NMR: 13-(trifluoromethyl)benzo[4,5]imidazo[1,2-*a*][1,10]phenanthroline (**6j**), (125 MHz, CDCl<sub>3</sub>)

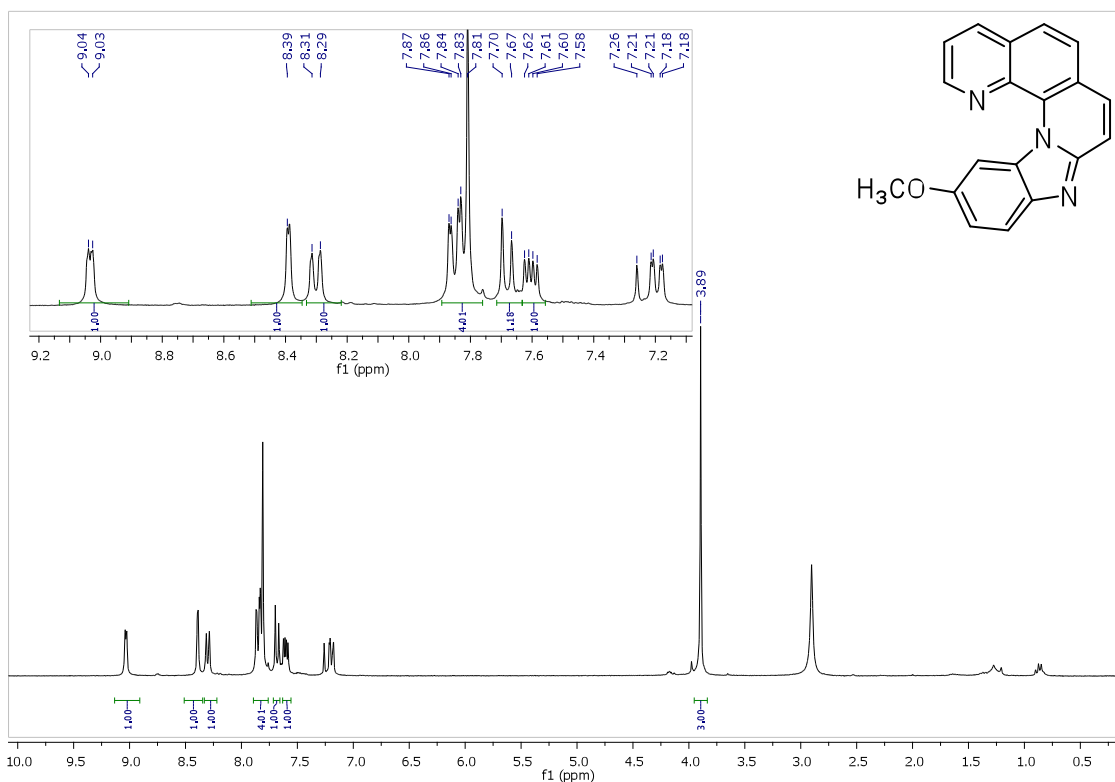

SI Figure 59: <sup>1</sup>H NMR: 14-methoxybenzo[4,5]imidazo[1,2-a][1,10]phenanthroline (**6m**), (300 MHz, CDCl<sub>3</sub>, DMSO-d<sub>6</sub>).

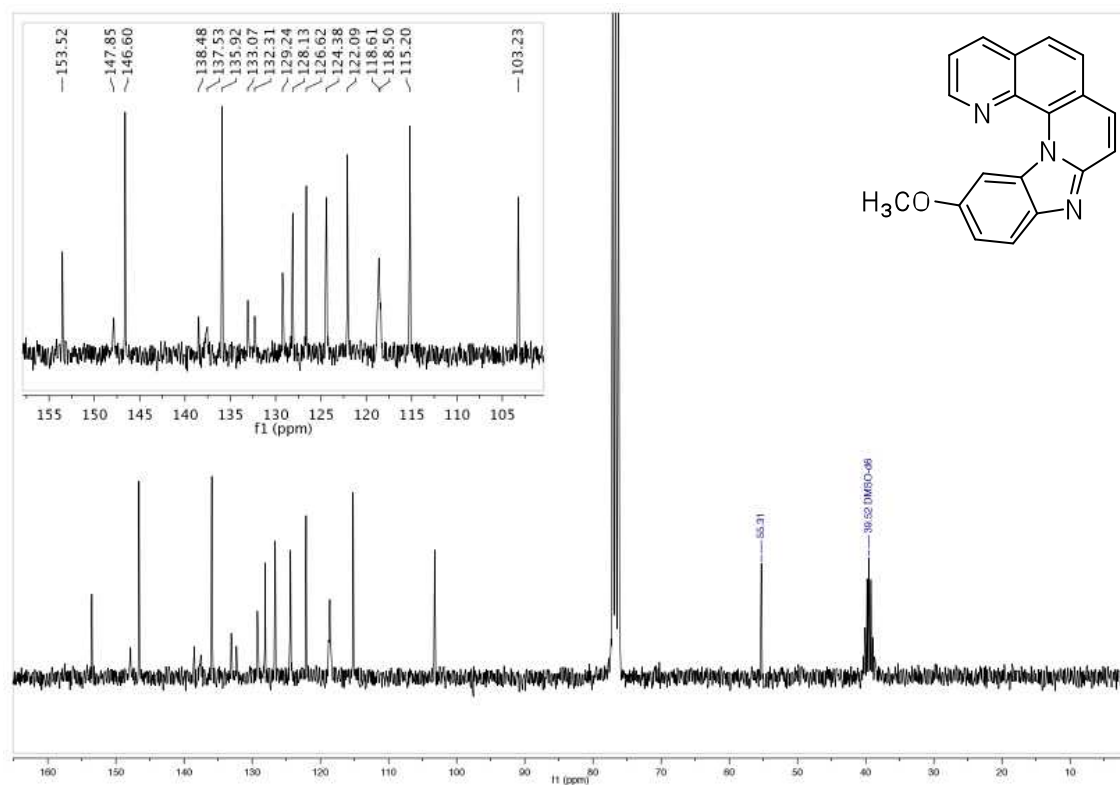

SI Figure 60: <sup>13</sup>C NMR: 14-methoxybenzo[4,5]imidazo[1,2-a][1,10]phenanthroline (**6m**), (75 MHz, CDCl<sub>3</sub>, DMSO-d<sub>6</sub>).

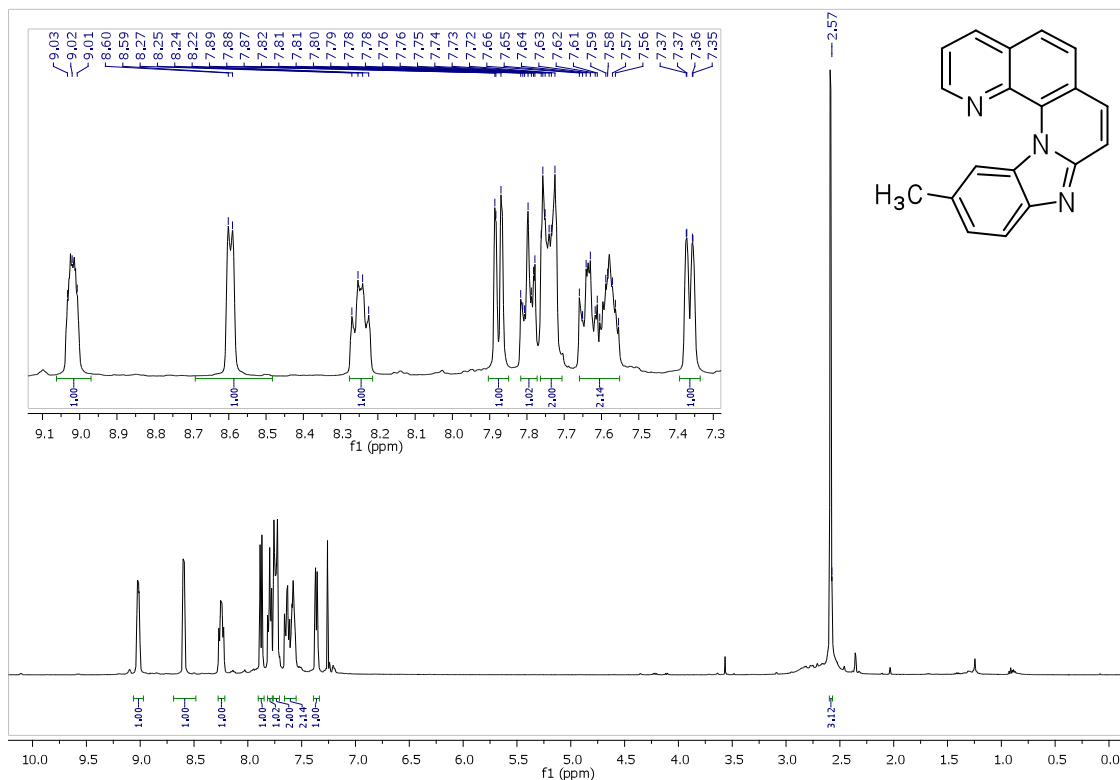

SI Figure 61:  $^1\text{H NMR}$ : 14-methylbenzo[4,5]imidazo[1,2-*a*][1,10]phenanthroline (**6n**), (500 MHz,  $\text{CDCl}_3$ ).

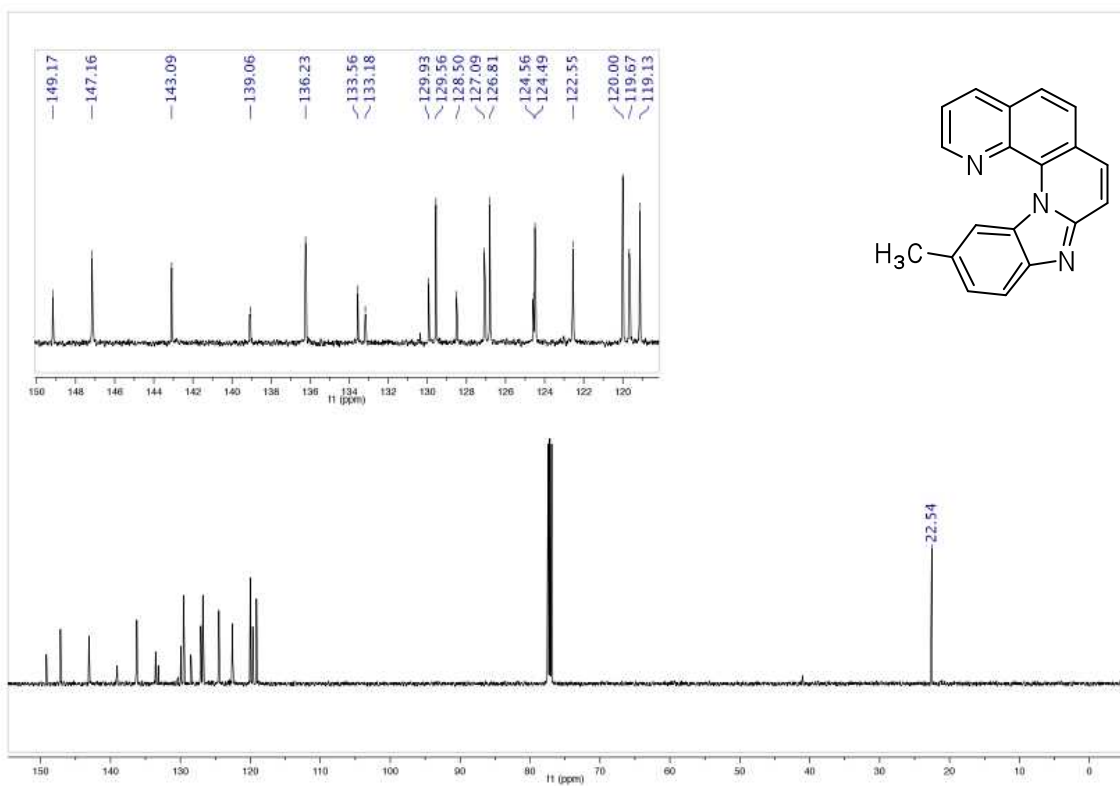

SI Figure 62:  $^{13}\text{C NMR}$ : 14-methylbenzo[4,5]imidazo[1,2-*a*][1,10]phenanthroline (**6n**), (125 MHz,  $\text{CDCl}_3$ ).



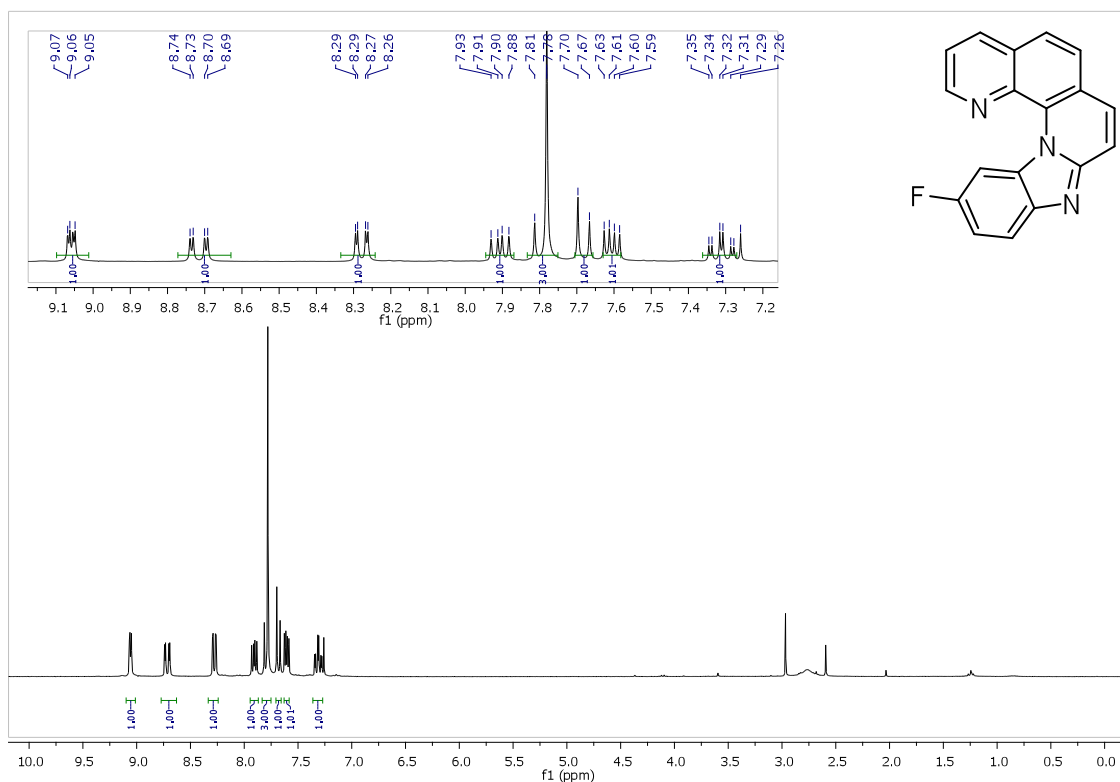

SI Figure 63: <sup>1</sup>H NMR: 14-fluorobenzo[4,5]imidazo[1,2-a][1,10]phenanthroline (**60**), (300 MHz, CDCl<sub>3</sub>).

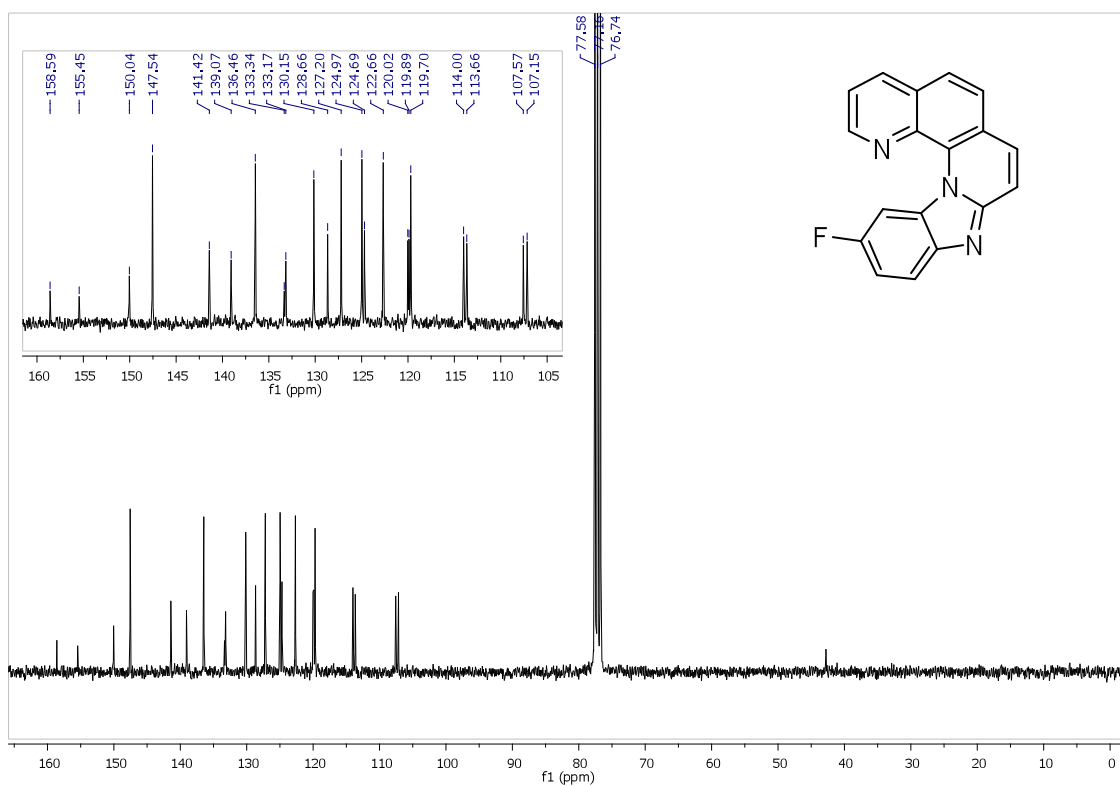

SI Figure 64: <sup>13</sup>C NMR: 14-fluorobenzo[4,5]imidazo[1,2-a][1,10]phenanthroline (**60**), (75 MHz, CDCl<sub>3</sub>).

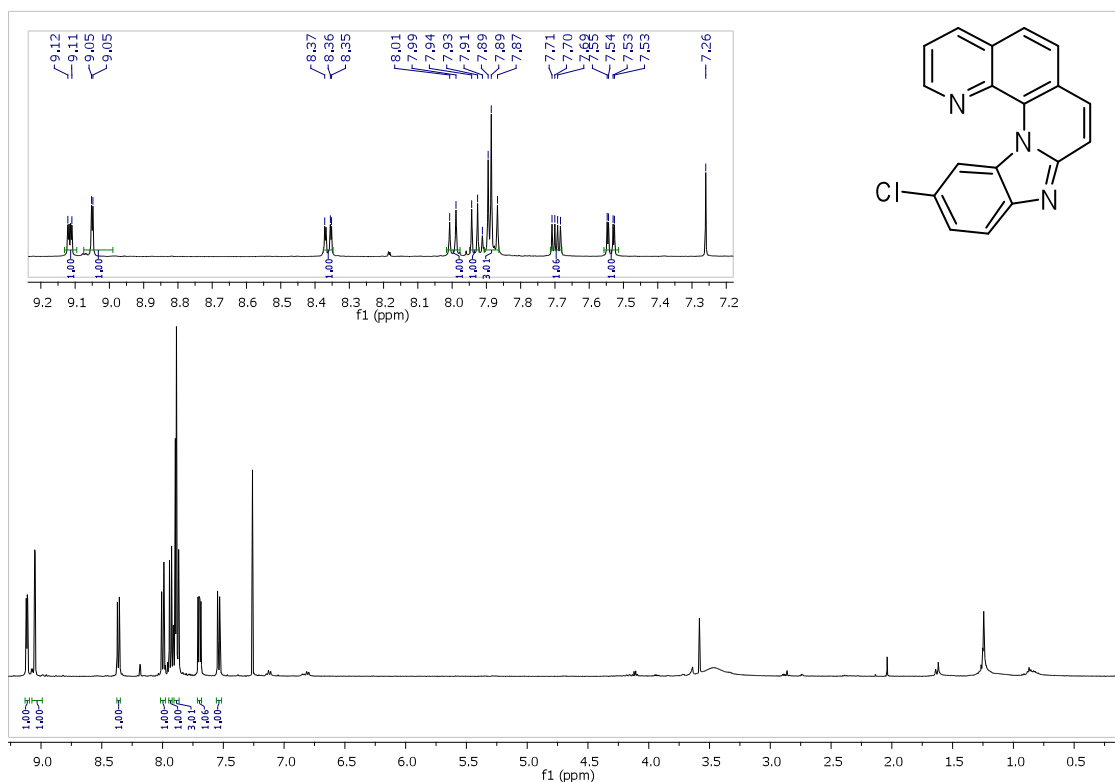

SI Figure 65: <sup>1</sup>H NMR: 14-chlorobenzo[4,5]imidazo[1,2-a][1,10]phenanthroline (**6p**), (500 MHz, CDCl<sub>3</sub>).

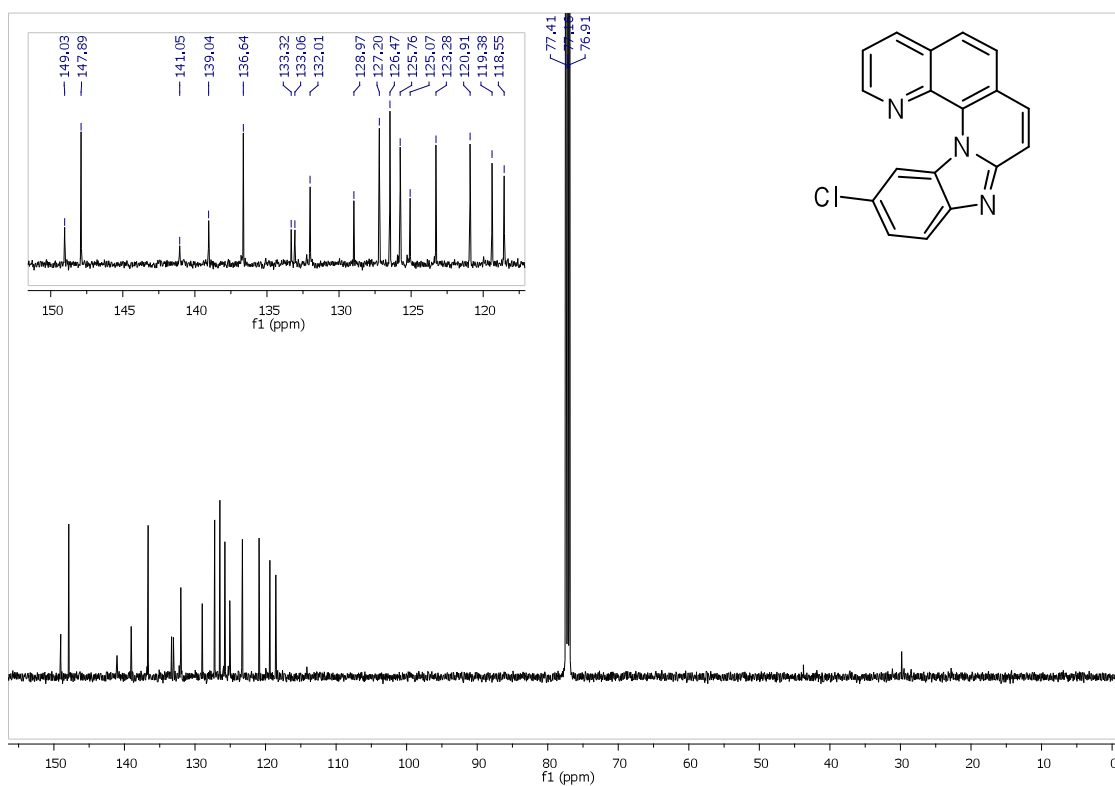

SI Figure 66: <sup>13</sup>C NMR: 14-chlorobenzo[4,5]imidazo[1,2-a][1,10]phenanthroline (**6p**), (125 MHz, CDCl<sub>3</sub>).

**Acquisition Parameter**

|             |            |                      |          |                  |           |
|-------------|------------|----------------------|----------|------------------|-----------|
| Source Type | ESI        | Ion Polarity         | Positive | Set Nebulizer    | 0.4 Bar   |
| Focus       | Not active |                      |          | Set Dry Heater   | 180 °C    |
| Scan Begin  | 50 m/z     | Set Capillary        | 3000 V   | Set Dry Gas      | 5.0 l/min |
| Scan End    | 896 m/z    | Set End Plate Offset | -500 V   | Set Divert Valve | Waste     |

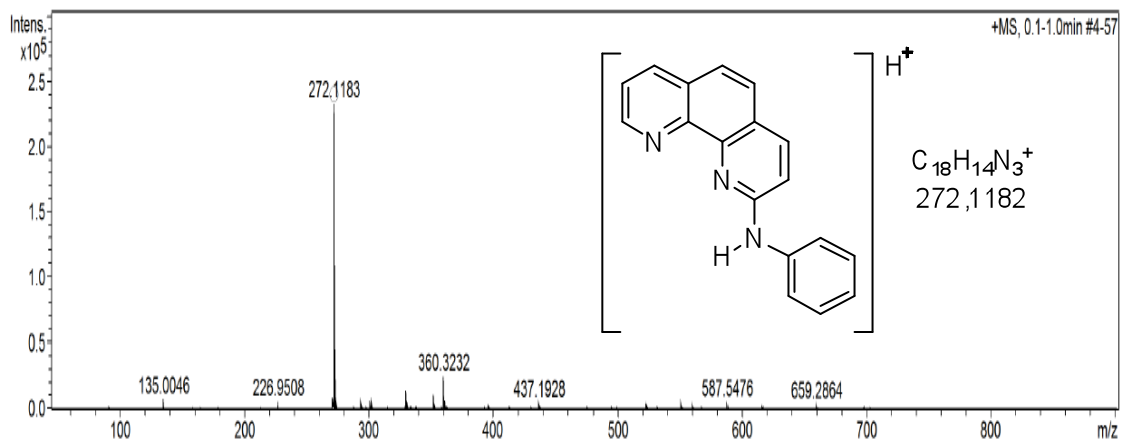
 SI Figure 67: HRMS of compound **3a**
**Acquisition Parameter**

|             |            |                      |          |                  |           |
|-------------|------------|----------------------|----------|------------------|-----------|
| Source Type | ESI        | Ion Polarity         | Positive | Set Nebulizer    | 0.4 Bar   |
| Focus       | Not active |                      |          | Set Dry Heater   | 180 °C    |
| Scan Begin  | 50 m/z     | Set Capillary        | 3000 V   | Set Dry Gas      | 5.0 l/min |
| Scan End    | 896 m/z    | Set End Plate Offset | -500 V   | Set Divert Valve | Waste     |

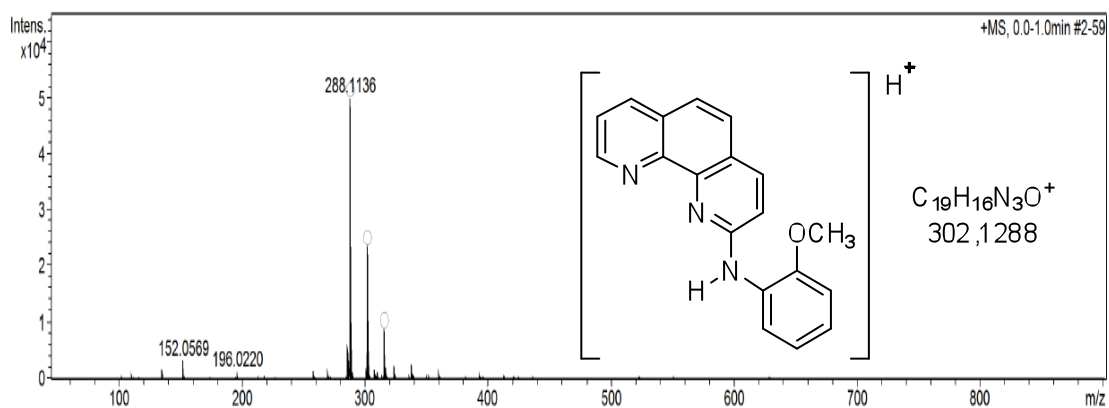

| Meas. m/z | # | Ion Formula | m/z      | err [ppm] | mSigma | # mSigma | Score  | rdb  | e <sup>-</sup> Conf | N-Rule |
|-----------|---|-------------|----------|-----------|--------|----------|--------|------|---------------------|--------|
| 288.1136  | 1 | C18H14N3O   | 288.1131 | -1.6      | 0.2    | 1        | 100.00 | 13.5 | even                | ok     |
| 302.1289  | 1 | C19H16N3O   | 302.1288 | -0.5      | 3.7    | 1        | 100.00 | 13.5 | even                | ok     |
| 316.1442  | 1 | C20H18N3O   | 316.1444 | 0.7       | 16.1   | 1        | 100.00 | 13.5 | even                | ok     |

 SI Figure 68: HRMS of compound **3b**.

**Acquisition Parameter**

|             |            |                      |          |                  |           |
|-------------|------------|----------------------|----------|------------------|-----------|
| Source Type | ESI        | Ion Polarity         | Positive | Set Nebulizer    | 0.4 Bar   |
| Focus       | Not active |                      |          | Set Dry Heater   | 180 °C    |
| Scan Begin  | 50 m/z     | Set Capillary        | 3000 V   | Set Dry Gas      | 5.0 l/min |
| Scan End    | 896 m/z    | Set End Plate Offset | -500 V   | Set Divert Valve | Waste     |

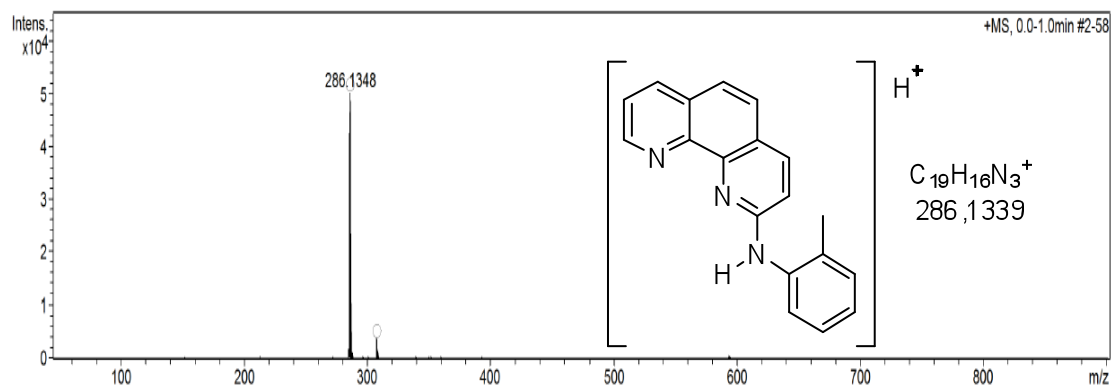SI Figure 69: HRMS of compound **3c****Acquisition Parameter**

|             |            |                      |          |                  |           |
|-------------|------------|----------------------|----------|------------------|-----------|
| Source Type | ESI        | Ion Polarity         | Positive | Set Nebulizer    | 0.4 Bar   |
| Focus       | Not active |                      |          | Set Dry Heater   | 180 °C    |
| Scan Begin  | 50 m/z     | Set Capillary        | 3800 V   | Set Dry Gas      | 5.0 l/min |
| Scan End    | 890 m/z    | Set End Plate Offset | -500 V   | Set Divert Valve | Waste     |

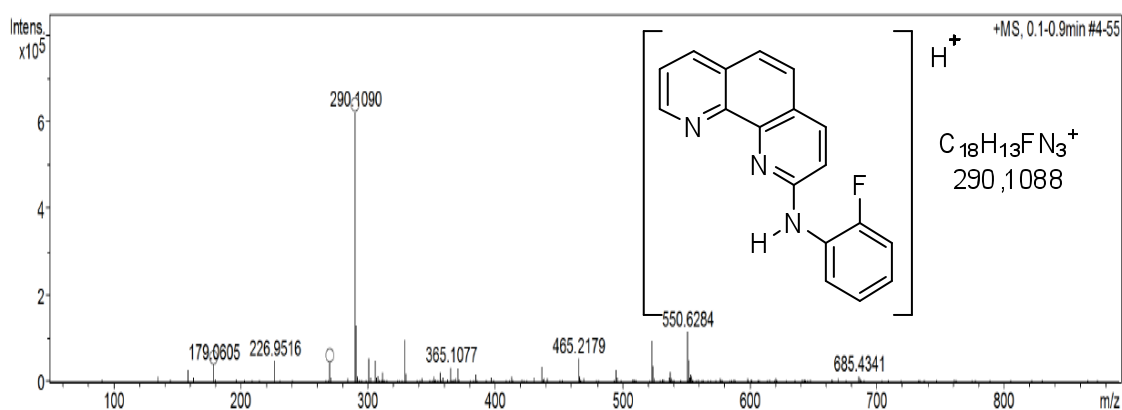SI Figure 70: HRMS of compound **3d**

| Acquisition Parameter |            |                      |          |                  |           |
|-----------------------|------------|----------------------|----------|------------------|-----------|
| Source Type           | ESI        | Ion Polarity         | Positive | Set Nebulizer    | 0.4 Bar   |
| Focus                 | Not active |                      |          | Set Dry Heater   | 180 °C    |
| Scan Begin            | 50 m/z     | Set Capillary        | 3800 V   | Set Dry Gas      | 5.0 l/min |
| Scan End              | 890 m/z    | Set End Plate Offset | -500 V   | Set Divert Valve | Waste     |

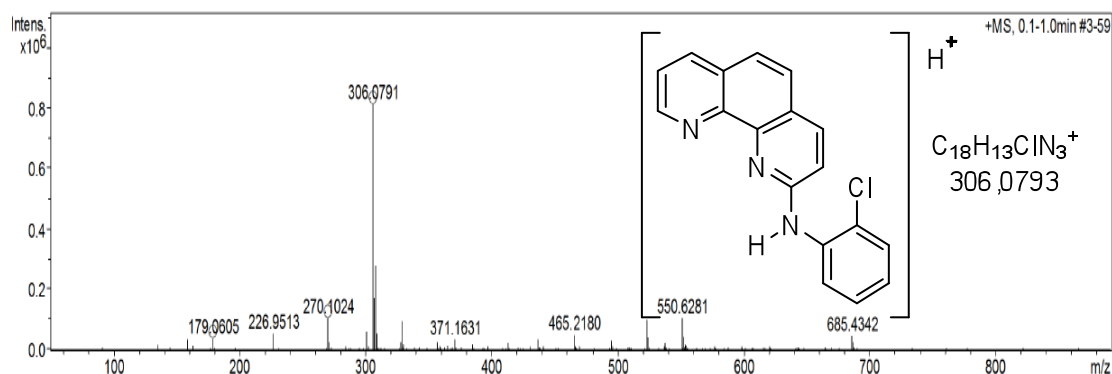

SI Figure 71: HRMS of compound **3e**

| Acquisition Parameter |            |                      |          |                  |           |
|-----------------------|------------|----------------------|----------|------------------|-----------|
| Source Type           | ESI        | Ion Polarity         | Positive | Set Nebulizer    | 0.4 Bar   |
| Focus                 | Not active |                      |          | Set Dry Heater   | 180 °C    |
| Scan Begin            | 50 m/z     | Set Capillary        | 3000 V   | Set Dry Gas      | 5.0 l/min |
| Scan End              | 896 m/z    | Set End Plate Offset | -500 V   | Set Divert Valve | Waste     |

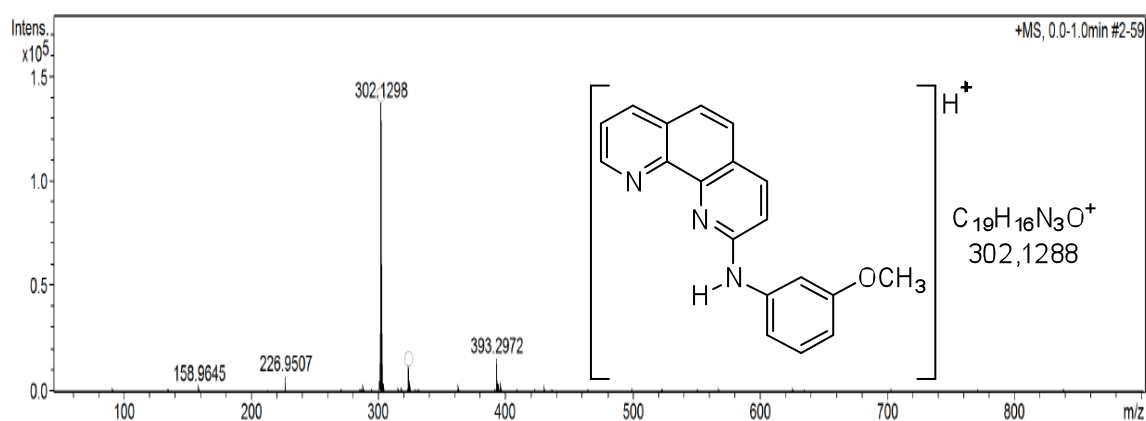

SI Figure 72: HRMS of compound **3f**

**Acquisition Parameter**

|             |            |                      |          |                  |           |
|-------------|------------|----------------------|----------|------------------|-----------|
| Source Type | ESI        | Ion Polarity         | Positive | Set Nebulizer    | 0.4 Bar   |
| Focus       | Not active |                      |          | Set Dry Heater   | 180 °C    |
| Scan Begin  | 50 m/z     | Set Capillary        | 3000 V   | Set Dry Gas      | 5.0 l/min |
| Scan End    | 896 m/z    | Set End Plate Offset | -500 V   | Set Divert Valve | Waste     |

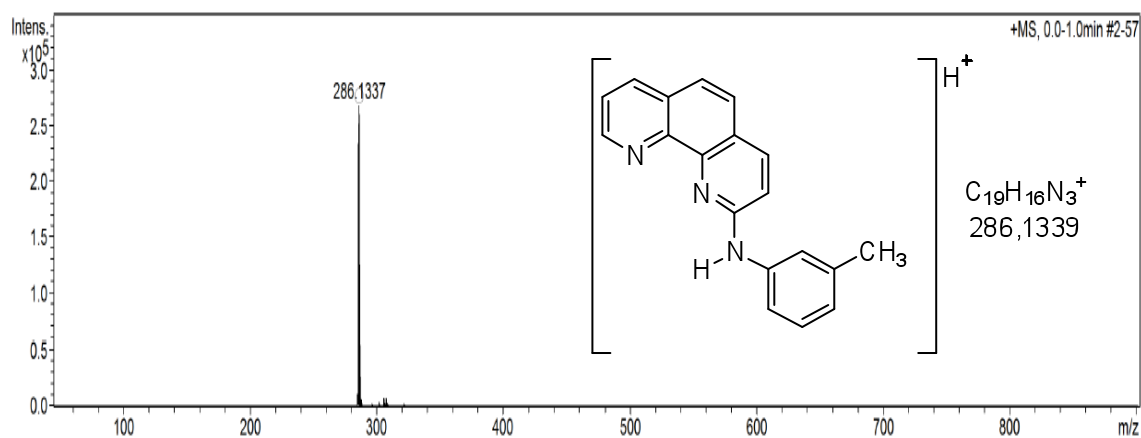SI Figure 73: HRMS of compound **3g****Acquisition Parameter**

|             |            |                      |          |                  |           |
|-------------|------------|----------------------|----------|------------------|-----------|
| Source Type | ESI        | Ion Polarity         | Positive | Set Nebulizer    | 0.5 Bar   |
| Focus       | Not active |                      |          | Set Dry Heater   | 180 °C    |
| Scan Begin  | 100 m/z    | Set Capillary        | 3500 V   | Set Dry Gas      | 5.0 l/min |
| Scan End    | 1600 m/z   | Set End Plate Offset | -500 V   | Set Divert Valve | Waste     |

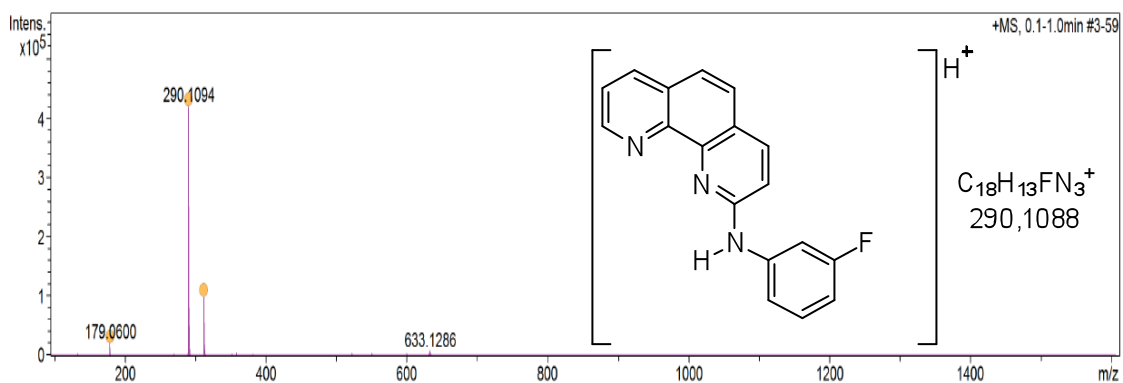SI Figure 74: HRMS of compound **3h**

**Acquisition Parameter**

|             |            |                      |          |                  |           |
|-------------|------------|----------------------|----------|------------------|-----------|
| Source Type | ESI        | Ion Polarity         | Positive | Set Nebulizer    | 0.4 Bar   |
| Focus       | Not active |                      |          | Set Dry Heater   | 180 °C    |
| Scan Begin  | 50 m/z     | Set Capillary        | 3000 V   | Set Dry Gas      | 5.0 l/min |
| Scan End    | 896 m/z    | Set End Plate Offset | -500 V   | Set Divert Valve | Waste     |

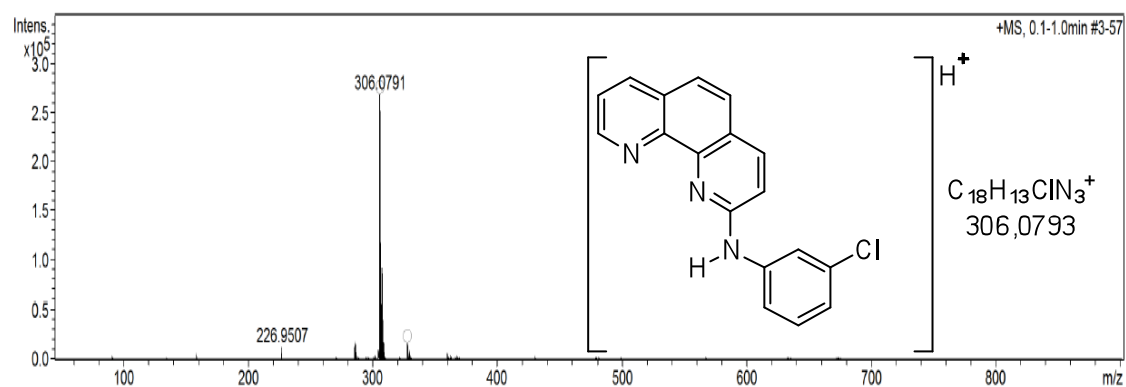

SI Figure 75: HRMS of compound 3i

**Acquisition Parameter**

|             |            |                      |          |                  |           |
|-------------|------------|----------------------|----------|------------------|-----------|
| Source Type | ESI        | Ion Polarity         | Positive | Set Nebulizer    | 0.4 Bar   |
| Focus       | Not active |                      |          | Set Dry Heater   | 180 °C    |
| Scan Begin  | 50 m/z     | Set Capillary        | 3000 V   | Set Dry Gas      | 5.0 l/min |
| Scan End    | 896 m/z    | Set End Plate Offset | -500 V   | Set Divert Valve | Waste     |

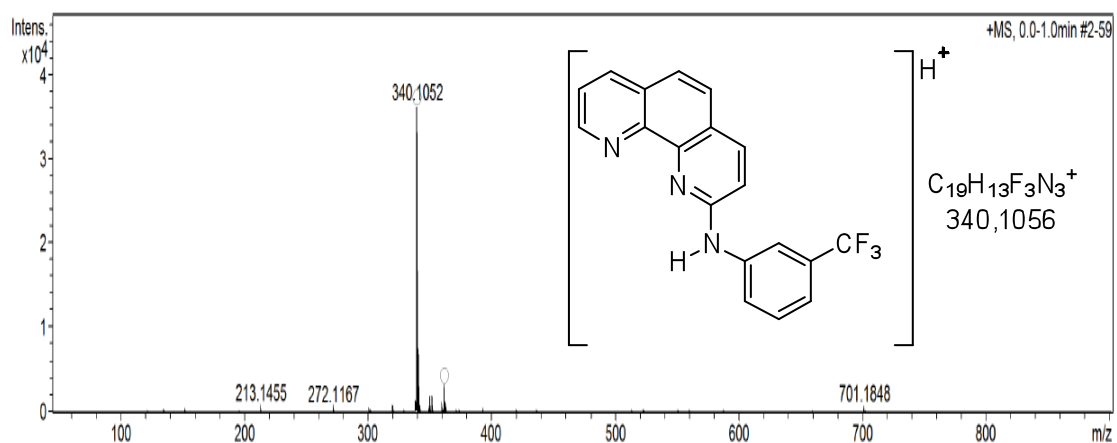

SI Figure 76: HRMS of compound 3j

**Acquisition Parameter**

|             |            |                      |          |                  |           |
|-------------|------------|----------------------|----------|------------------|-----------|
| Source Type | ESI        | Ion Polarity         | Positive | Set Nebulizer    | 0.4 Bar   |
| Focus       | Not active |                      |          | Set Dry Heater   | 180 °C    |
| Scan Begin  | 50 m/z     | Set Capillary        | 3000 V   | Set Dry Gas      | 5.0 l/min |
| Scan End    | 896 m/z    | Set End Plate Offset | -500 V   | Set Divert Valve | Waste     |

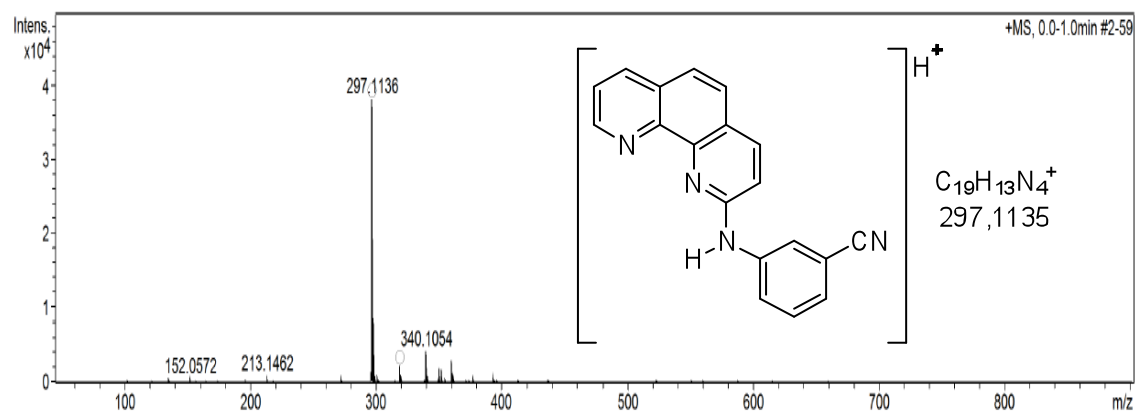

SI Figure 77: HRMS of compound 3k

**Acquisition Parameter**

|             |            |                      |          |                  |           |
|-------------|------------|----------------------|----------|------------------|-----------|
| Source Type | ESI        | Ion Polarity         | Positive | Set Nebulizer    | 0.4 Bar   |
| Focus       | Not active |                      |          | Set Dry Heater   | 180 °C    |
| Scan Begin  | 50 m/z     | Set Capillary        | 3500 V   | Set Dry Gas      | 5.0 l/min |
| Scan End    | 890 m/z    | Set End Plate Offset | -500 V   | Set Divert Valve | Waste     |

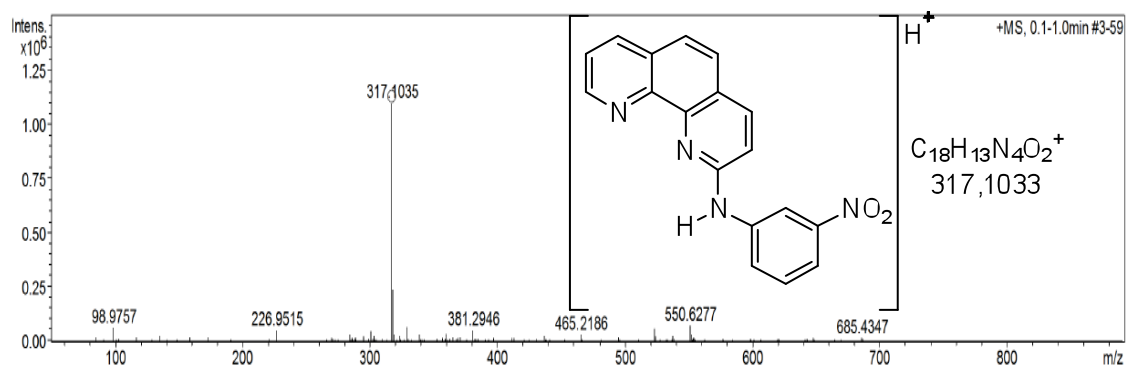

SI Figure 78: HRMS of compound 3l



**Acquisition Parameter**

|             |            |                      |          |                  |           |
|-------------|------------|----------------------|----------|------------------|-----------|
| Source Type | ESI        | Ion Polarity         | Positive | Set Nebulizer    | 0.4 Bar   |
| Focus       | Not active |                      |          | Set Dry Heater   | 180 °C    |
| Scan Begin  | 50 m/z     | Set Capillary        | 3000 V   | Set Dry Gas      | 5.0 l/min |
| Scan End    | 896 m/z    | Set End Plate Offset | -500 V   | Set Divert Valve | Waste     |

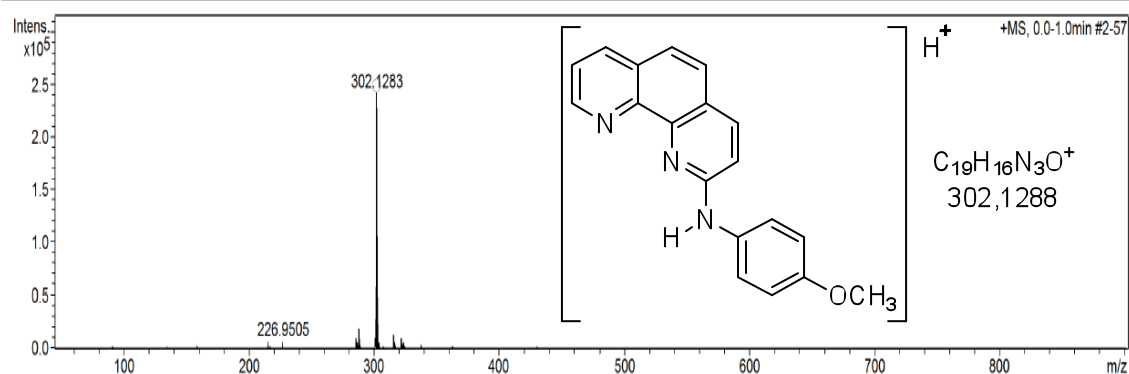SI Figure 79: HRMS of compound **3m****Acquisition Parameter**

|             |            |                      |          |                  |           |
|-------------|------------|----------------------|----------|------------------|-----------|
| Source Type | ESI        | Ion Polarity         | Positive | Set Nebulizer    | 0.4 Bar   |
| Focus       | Not active |                      |          | Set Dry Heater   | 180 °C    |
| Scan Begin  | 50 m/z     | Set Capillary        | 3000 V   | Set Dry Gas      | 5.0 l/min |
| Scan End    | 896 m/z    | Set End Plate Offset | -500 V   | Set Divert Valve | Waste     |

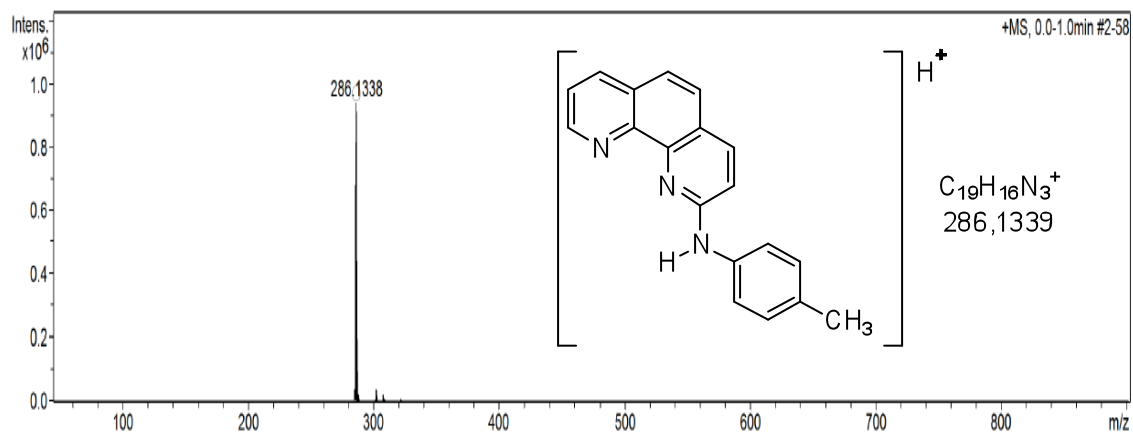SI Figure 80: HRMS of compound **3n**

**Acquisition Parameter**

|             |            |                      |          |                  |           |
|-------------|------------|----------------------|----------|------------------|-----------|
| Source Type | ESI        | Ion Polarity         | Positive | Set Nebulizer    | 0.4 Bar   |
| Focus       | Not active |                      |          | Set Dry Heater   | 180 °C    |
| Scan Begin  | 50 m/z     | Set Capillary        | 3000 V   | Set Dry Gas      | 5.0 l/min |
| Scan End    | 896 m/z    | Set End Plate Offset | -500 V   | Set Divert Valve | Waste     |

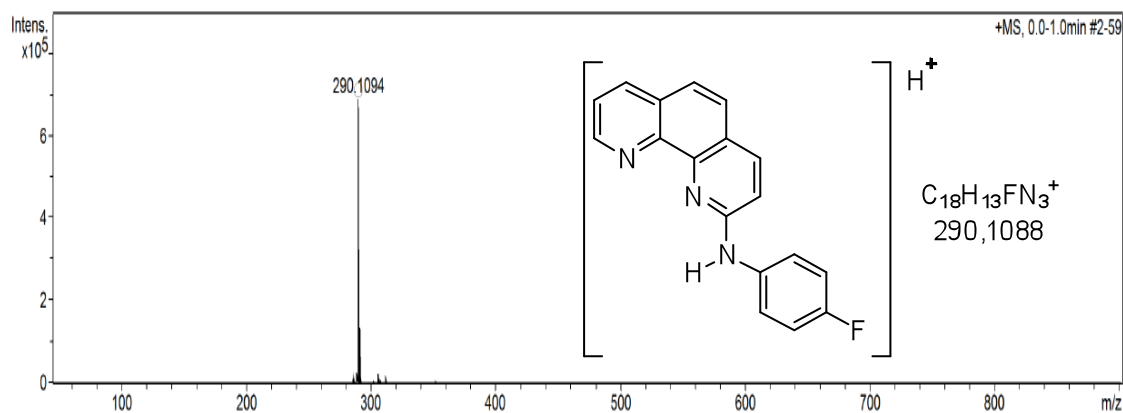SI Figure 81: HRMS of compound **3o****Acquisition Parameter**

|             |            |                      |          |                  |           |
|-------------|------------|----------------------|----------|------------------|-----------|
| Source Type | ESI        | Ion Polarity         | Positive | Set Nebulizer    | 0.4 Bar   |
| Focus       | Not active |                      |          | Set Dry Heater   | 180 °C    |
| Scan Begin  | 50 m/z     | Set Capillary        | 3000 V   | Set Dry Gas      | 5.0 l/min |
| Scan End    | 896 m/z    | Set End Plate Offset | -500 V   | Set Divert Valve | Waste     |

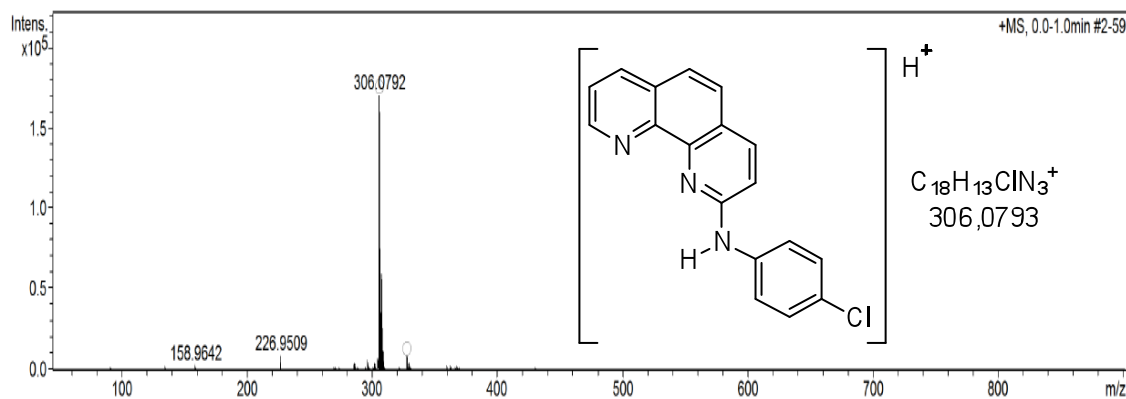SI Figure 82: HRMS of compound **3p**

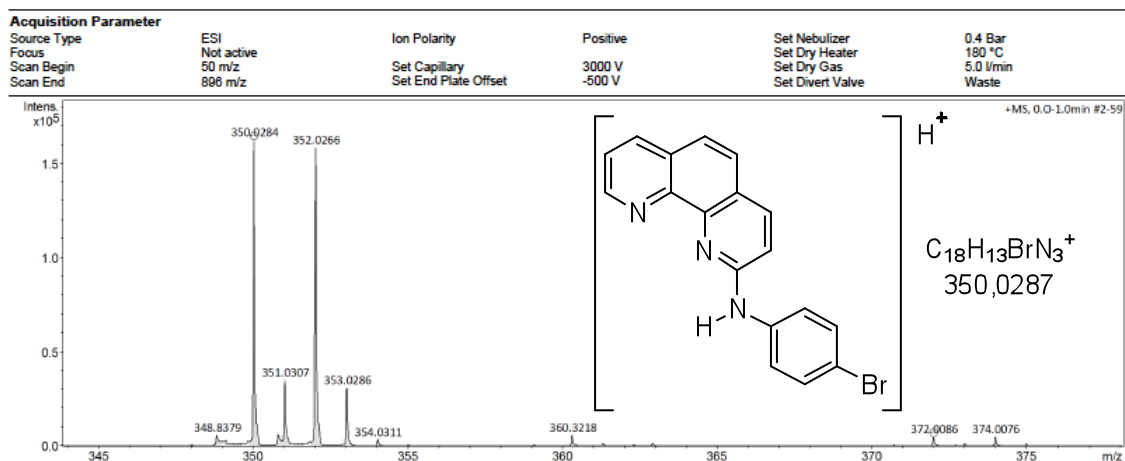

SI Figure 83: HRMS of compound **3q**

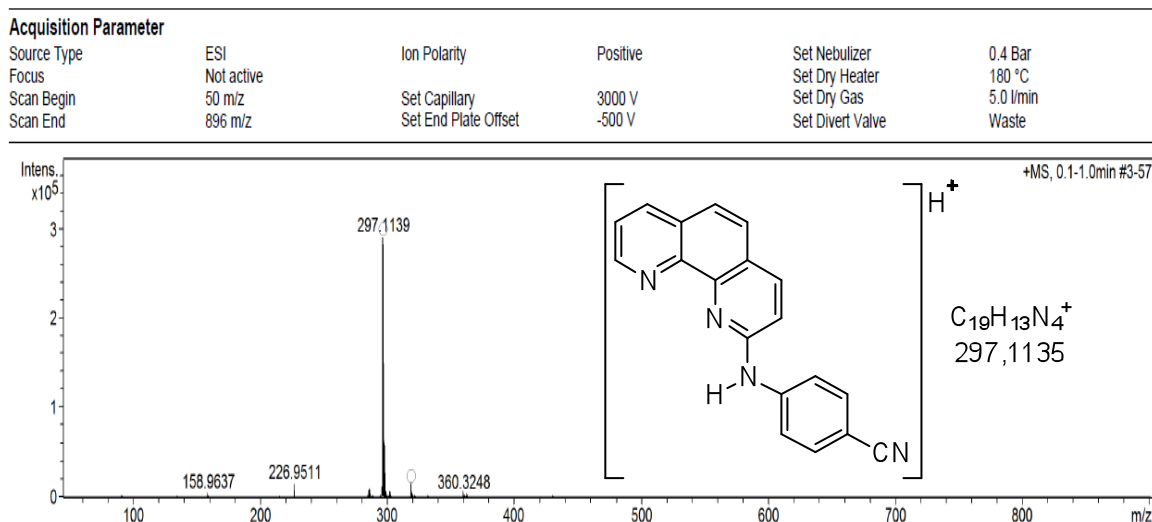

SI Figure 84: HRMS of compound **3r**

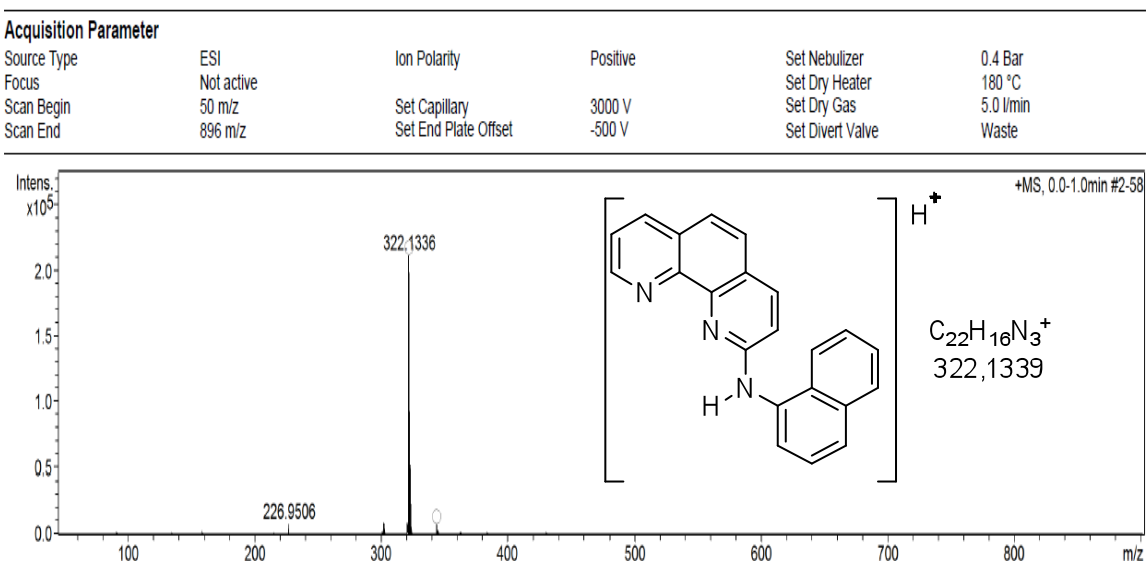

SI Figure 85: HRMS of compound **3s**

**Acquisition Parameter**

|             |            |                      |          |                  |           |
|-------------|------------|----------------------|----------|------------------|-----------|
| Source Type | ESI        | Ion Polarity         | Positive | Set Nebulizer    | 0.4 Bar   |
| Focus       | Not active |                      |          | Set Dry Heater   | 180 °C    |
| Scan Begin  | 50 m/z     | Set Capillary        | 3500 V   | Set Dry Gas      | 5.0 l/min |
| Scan End    | 890 m/z    | Set End Plate Offset | -500 V   | Set Divert Valve | Waste     |

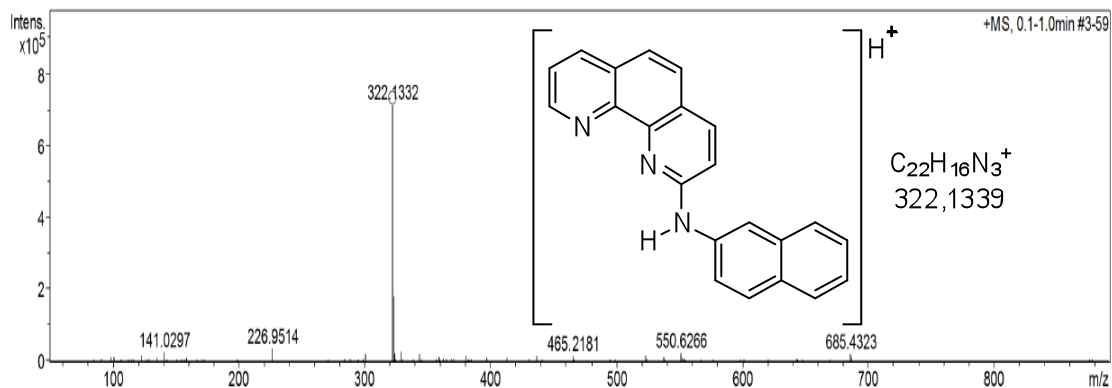SI Figure 86: HRMS of compound **3t****Acquisition Parameter**

|             |            |                      |          |                  |           |
|-------------|------------|----------------------|----------|------------------|-----------|
| Source Type | ESI        | Ion Polarity         | Positive | Set Nebulizer    | 0.5 Bar   |
| Focus       | Not active |                      |          | Set Dry Heater   | 180 °C    |
| Scan Begin  | 50 m/z     | Set Capillary        | 3500 V   | Set Dry Gas      | 4.0 l/min |
| Scan End    | 600 m/z    | Set End Plate Offset | -500 V   | Set Divert Valve | Waste     |

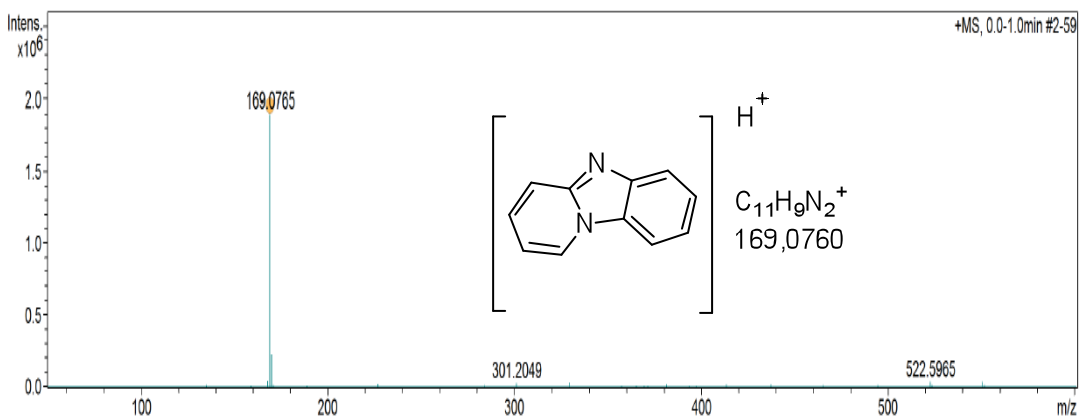SI Figure 87: HRMS of compound **5**

**Acquisition Parameter**

|             |            |                      |          |                  |           |
|-------------|------------|----------------------|----------|------------------|-----------|
| Source Type | ESI        | Ion Polarity         | Positive | Set Nebulizer    | 0.5 Bar   |
| Focus       | Not active |                      |          | Set Dry Heater   | 180 °C    |
| Scan Begin  | 50 m/z     | Set Capillary        | 3500 V   | Set Dry Gas      | 4.0 l/min |
| Scan End    | 600 m/z    | Set End Plate Offset | -500 V   | Set Divert Valve | Waste     |

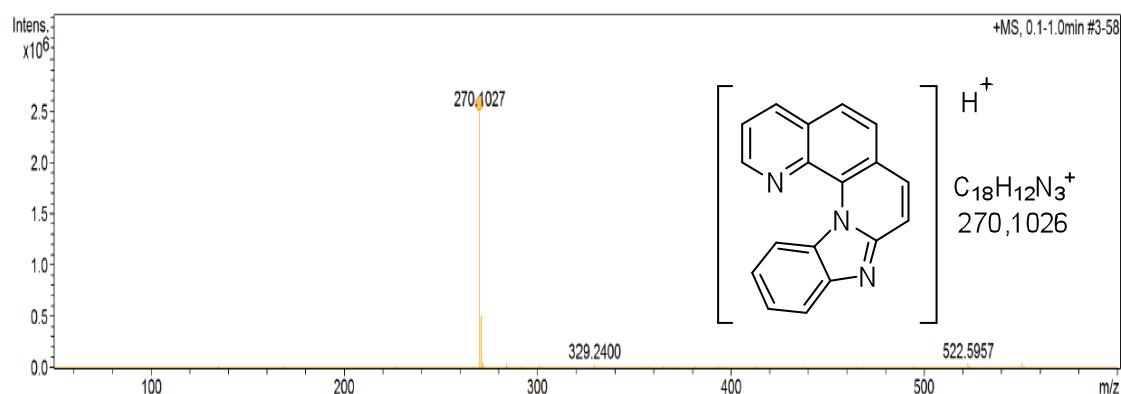

SI Figure 88: HRMS of compound 6a

**Acquisition Parameter**

|             |            |                      |          |                  |           |
|-------------|------------|----------------------|----------|------------------|-----------|
| Source Type | ESI        | Ion Polarity         | Positive | Set Nebulizer    | 0.4 Bar   |
| Focus       | Not active |                      |          | Set Dry Heater   | 180 °C    |
| Scan Begin  | 50 m/z     | Set Capillary        | 3500 V   | Set Dry Gas      | 5.0 l/min |
| Scan End    | 890 m/z    | Set End Plate Offset | -500 V   | Set Divert Valve | Waste     |

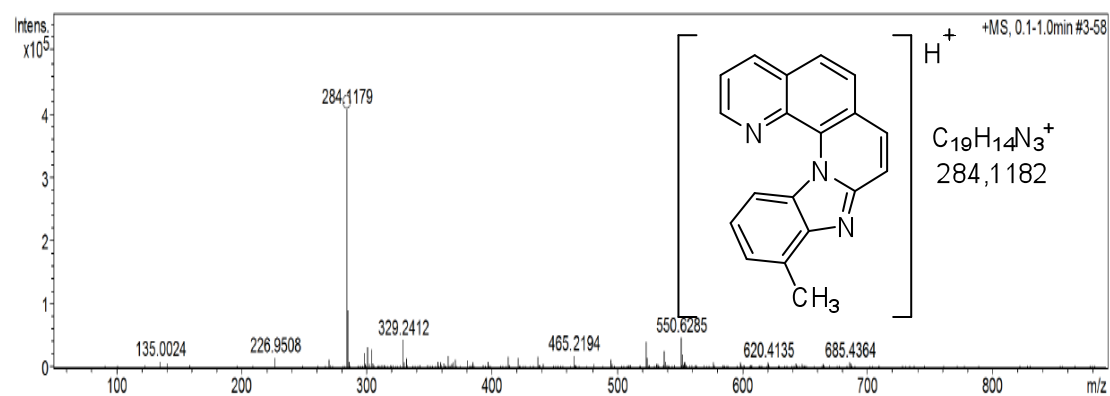

SI Figure 89: HRMS of compound 6c

| Acquisition Parameter |            |                      |          |                  |           |
|-----------------------|------------|----------------------|----------|------------------|-----------|
| Source Type           | ESI        | Ion Polarity         | Positive | Set Nebulizer    | 0.4 Bar   |
| Focus                 | Not active |                      |          | Set Dry Heater   | 180 °C    |
| Scan Begin            | 50 m/z     | Set Capillary        | 3800 V   | Set Dry Gas      | 5.0 l/min |
| Scan End              | 890 m/z    | Set End Plate Offset | -500 V   | Set Divert Valve | Waste     |

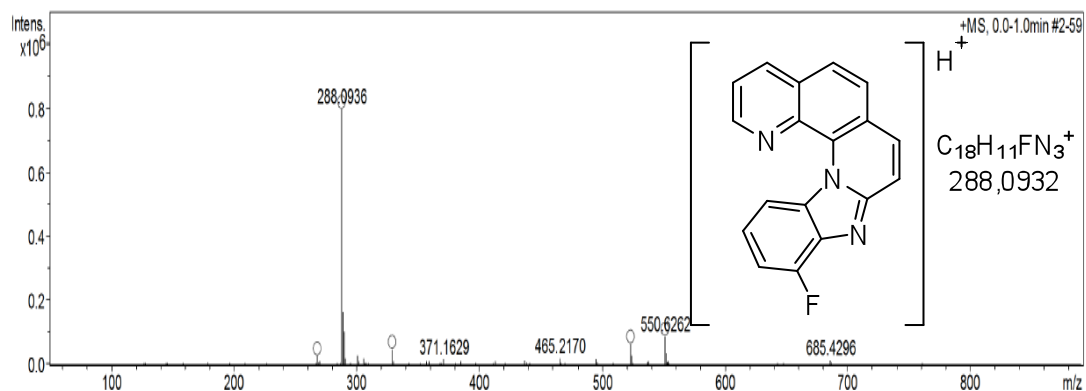

SI Figure 90: HRMS of compound **6d**

| Acquisition Parameter |            |                      |          |                  |           |
|-----------------------|------------|----------------------|----------|------------------|-----------|
| Source Type           | ESI        | Ion Polarity         | Positive | Set Nebulizer    | 0.5 Bar   |
| Focus                 | Not active |                      |          | Set Dry Heater   | 180 °C    |
| Scan Begin            | 100 m/z    | Set Capillary        | 3500 V   | Set Dry Gas      | 5.0 l/min |
| Scan End              | 1600 m/z   | Set End Plate Offset | -500 V   | Set Divert Valve | Waste     |

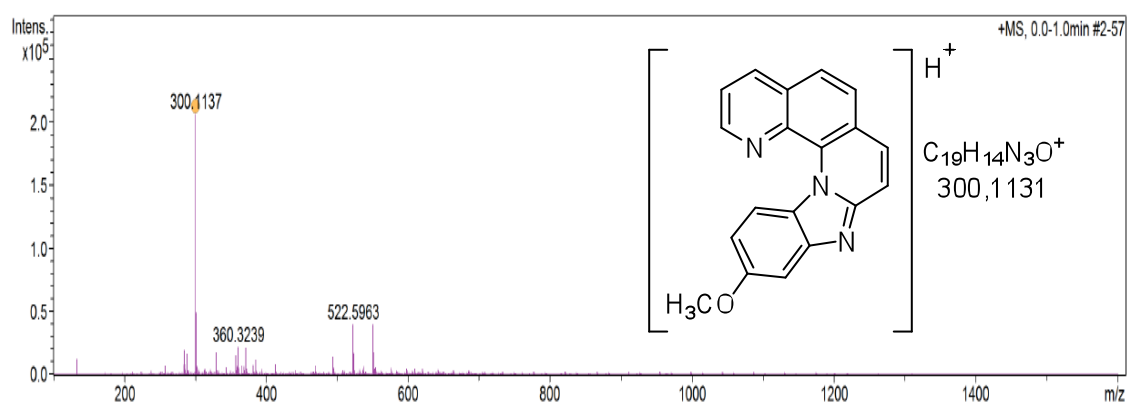

SI Figure 91: HRMS of compound **6f**

**Acquisition Parameter**

|             |            |                      |          |                  |           |
|-------------|------------|----------------------|----------|------------------|-----------|
| Source Type | ESI        | Ion Polarity         | Positive | Set Nebulizer    | 0.4 Bar   |
| Focus       | Not active |                      |          | Set Dry Heater   | 180 °C    |
| Scan Begin  | 50 m/z     | Set Capillary        | 3500 V   | Set Dry Gas      | 5.0 l/min |
| Scan End    | 890 m/z    | Set End Plate Offset | -500 V   | Set Divert Valve | Waste     |

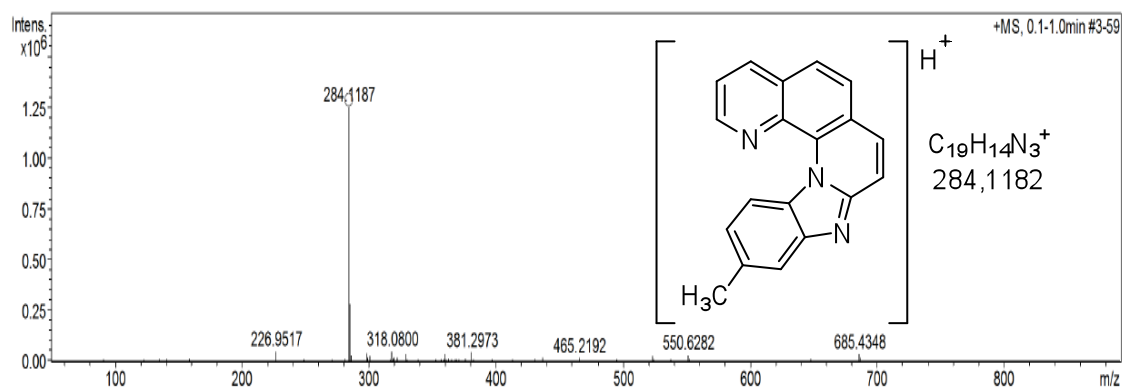SI Figure 92: HRMS of compound **6g****Acquisition Parameter**

|             |            |                      |          |                  |           |
|-------------|------------|----------------------|----------|------------------|-----------|
| Source Type | ESI        | Ion Polarity         | Positive | Set Nebulizer    | 0.5 Bar   |
| Focus       | Not active |                      |          | Set Dry Heater   | 180 °C    |
| Scan Begin  | 100 m/z    | Set Capillary        | 3500 V   | Set Dry Gas      | 5.0 l/min |
| Scan End    | 1600 m/z   | Set End Plate Offset | -500 V   | Set Divert Valve | Waste     |

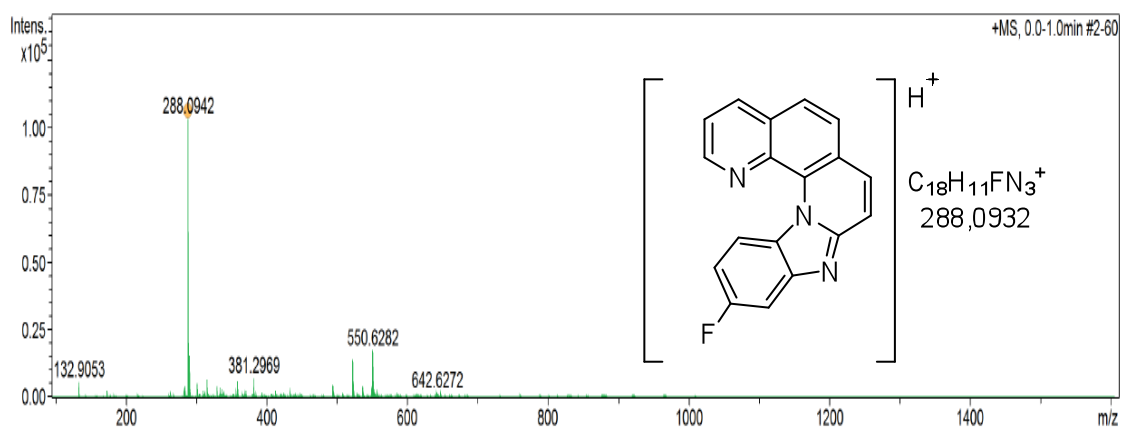SI Figure 93: HRMS of compound **6h**

**Acquisition Parameter**

|             |            |                      |          |                  |           |
|-------------|------------|----------------------|----------|------------------|-----------|
| Source Type | ESI        | Ion Polarity         | Positive | Set Nebulizer    | 0.5 Bar   |
| Focus       | Not active |                      |          | Set Dry Heater   | 180 °C    |
| Scan Begin  | 100 m/z    | Set Capillary        | 3500 V   | Set Dry Gas      | 5.0 l/min |
| Scan End    | 1600 m/z   | Set End Plate Offset | -500 V   | Set Divert Valve | Waste     |

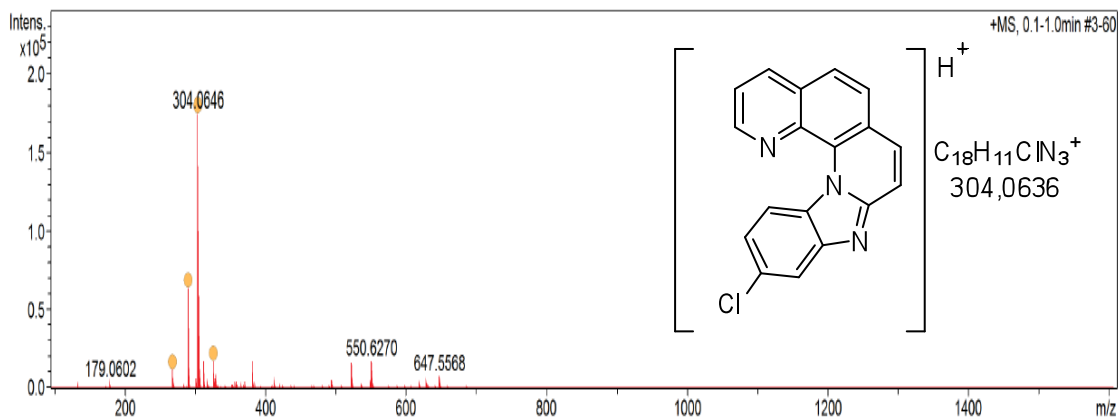SI Figure 94: HRMS of compound **6i****Acquisition Parameter**

|             |            |                      |          |                  |           |
|-------------|------------|----------------------|----------|------------------|-----------|
| Source Type | ESI        | Ion Polarity         | Positive | Set Nebulizer    | 0.5 Bar   |
| Focus       | Not active |                      |          | Set Dry Heater   | 180 °C    |
| Scan Begin  | 100 m/z    | Set Capillary        | 3500 V   | Set Dry Gas      | 5.0 l/min |
| Scan End    | 1600 m/z   | Set End Plate Offset | -500 V   | Set Divert Valve | Waste     |

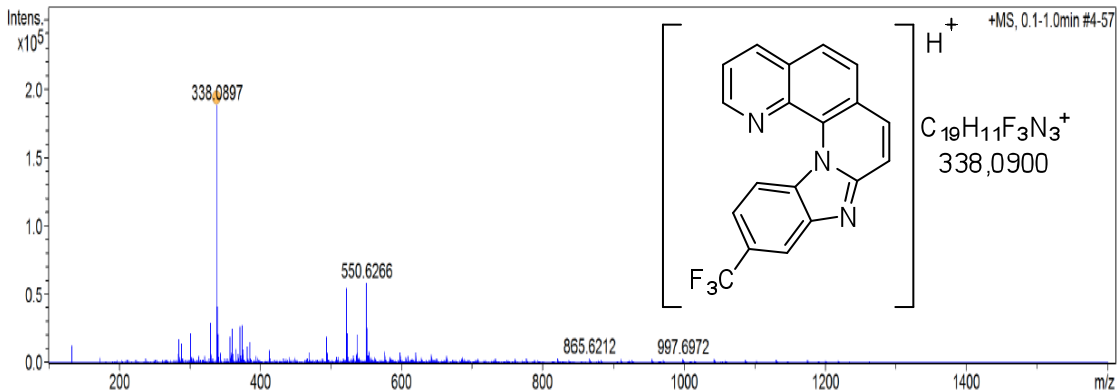SI Figure 95: HRMS of compound **6j**



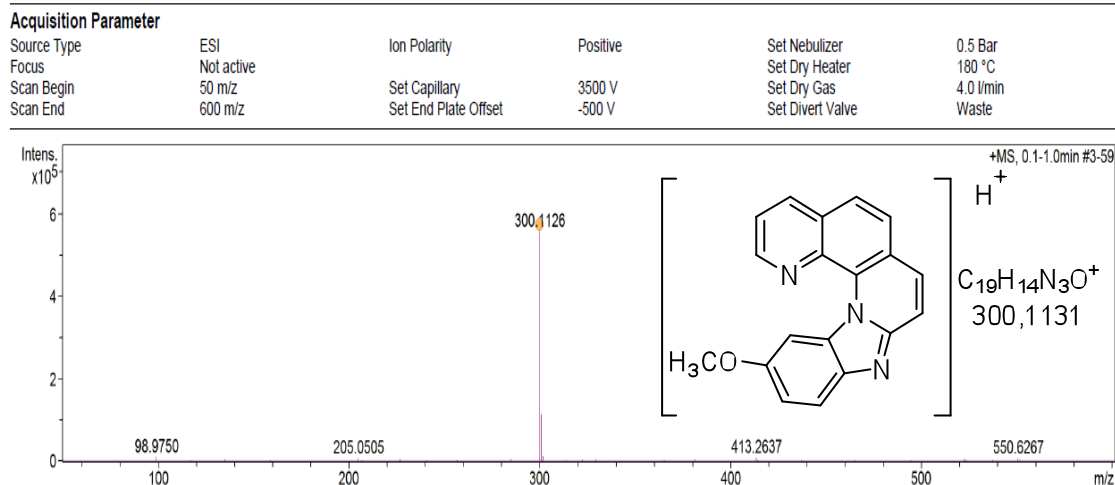

SI Figure 96: HRMS of compound **6m**

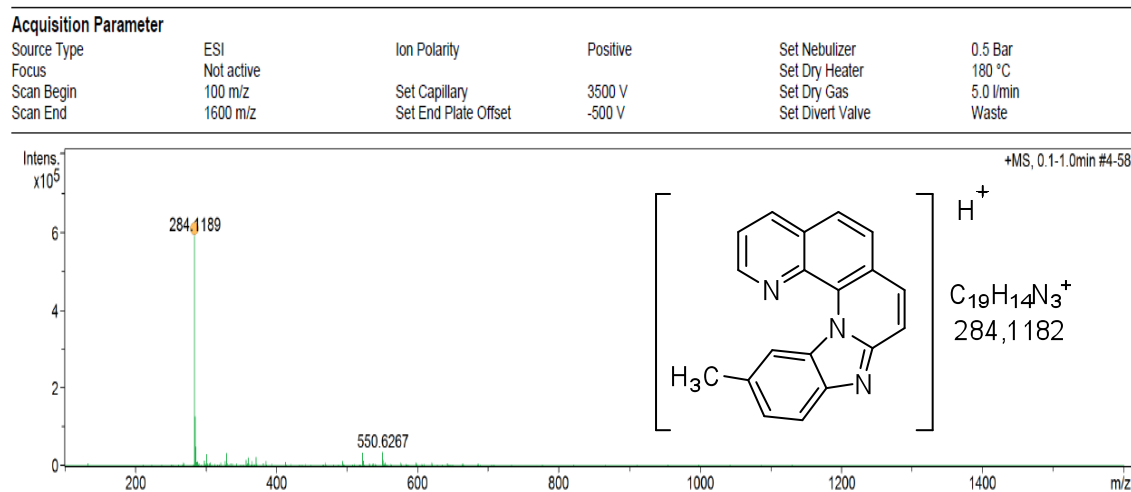

SI Figure 97: HRMS of compound **6n**

**Acquisition Parameter**

|             |            |                      |          |                  |           |
|-------------|------------|----------------------|----------|------------------|-----------|
| Source Type | ESI        | Ion Polarity         | Positive | Set Nebulizer    | 0.5 Bar   |
| Focus       | Not active |                      |          | Set Dry Heater   | 180 °C    |
| Scan Begin  | 100 m/z    | Set Capillary        | 3500 V   | Set Dry Gas      | 5.0 l/min |
| Scan End    | 1600 m/z   | Set End Plate Offset | -500 V   | Set Divert Valve | Waste     |

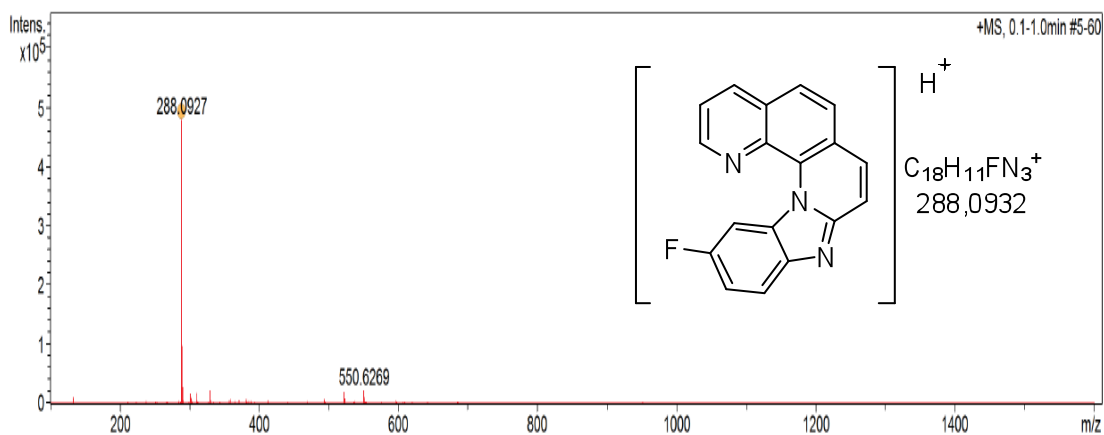SI Figure 98: HRMS of compound **6o****Acquisition Parameter**

|             |            |                      |          |                  |           |
|-------------|------------|----------------------|----------|------------------|-----------|
| Source Type | ESI        | Ion Polarity         | Positive | Set Nebulizer    | 0.4 Bar   |
| Focus       | Not active |                      |          | Set Dry Heater   | 180 °C    |
| Scan Begin  | 50 m/z     | Set Capillary        | 3500 V   | Set Dry Gas      | 5.0 l/min |
| Scan End    | 890 m/z    | Set End Plate Offset | -500 V   | Set Divert Valve | Waste     |

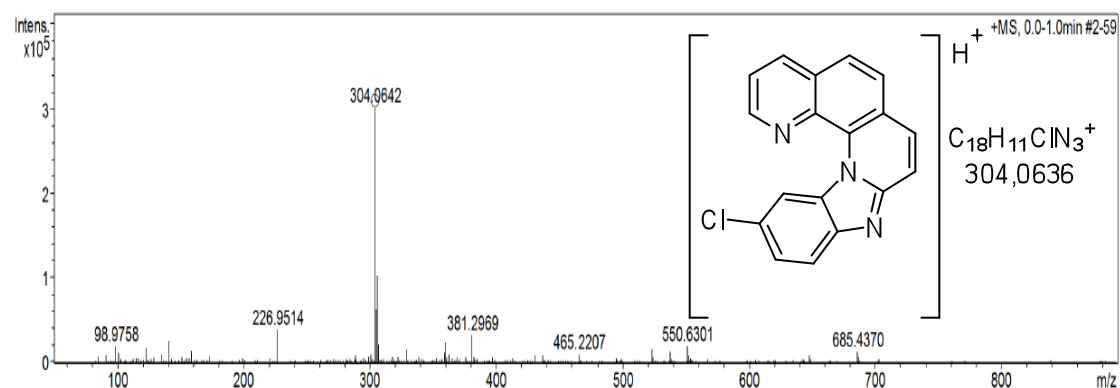SI Figure 99: HRMS of compound **6p**

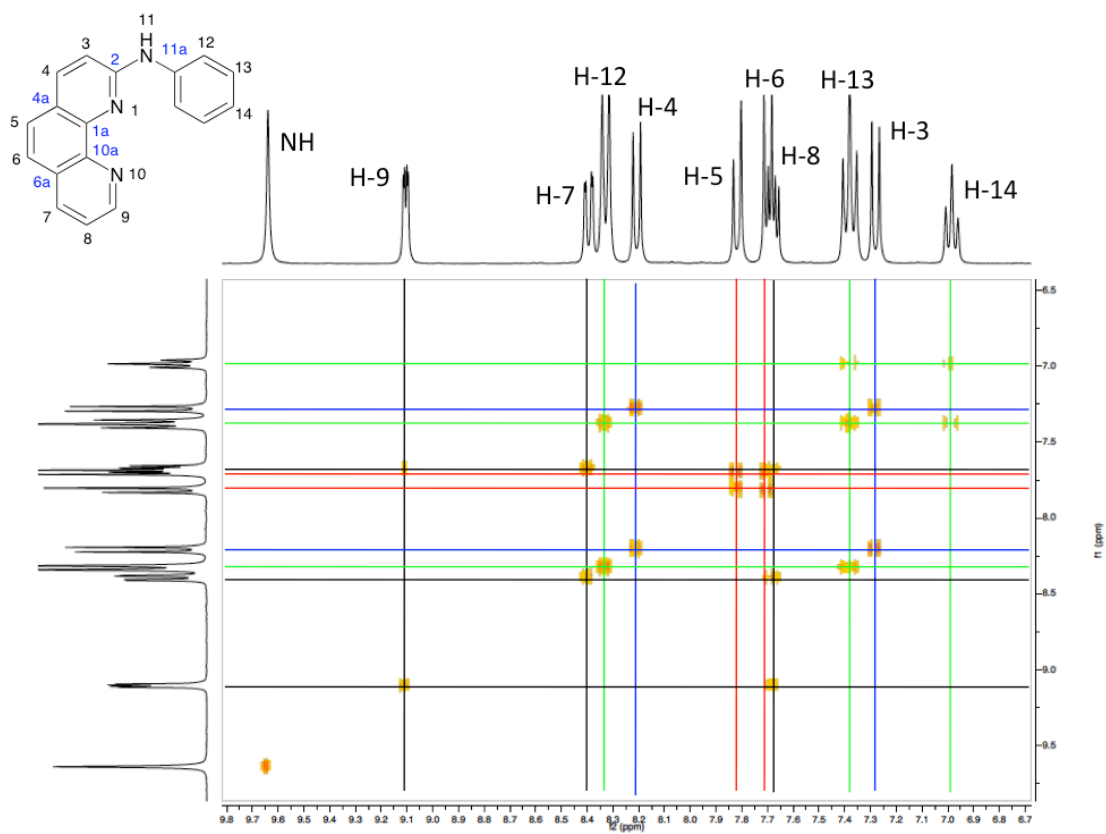

SI Figure 100: COSY spectrum of *N*-phenyl-1,10-phenanthroline (**3a**)

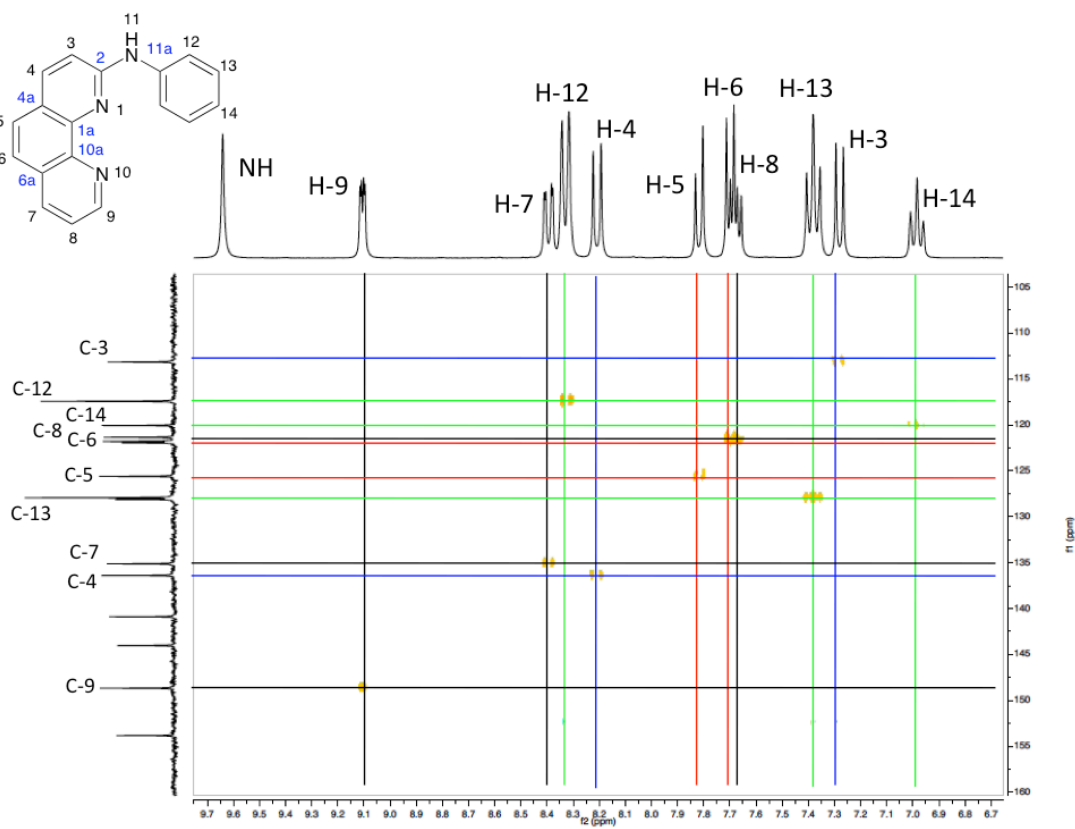

SI Figure 101: HMBC spectrum of *N*-phenyl-1,10-phenanthroline (**3a**)

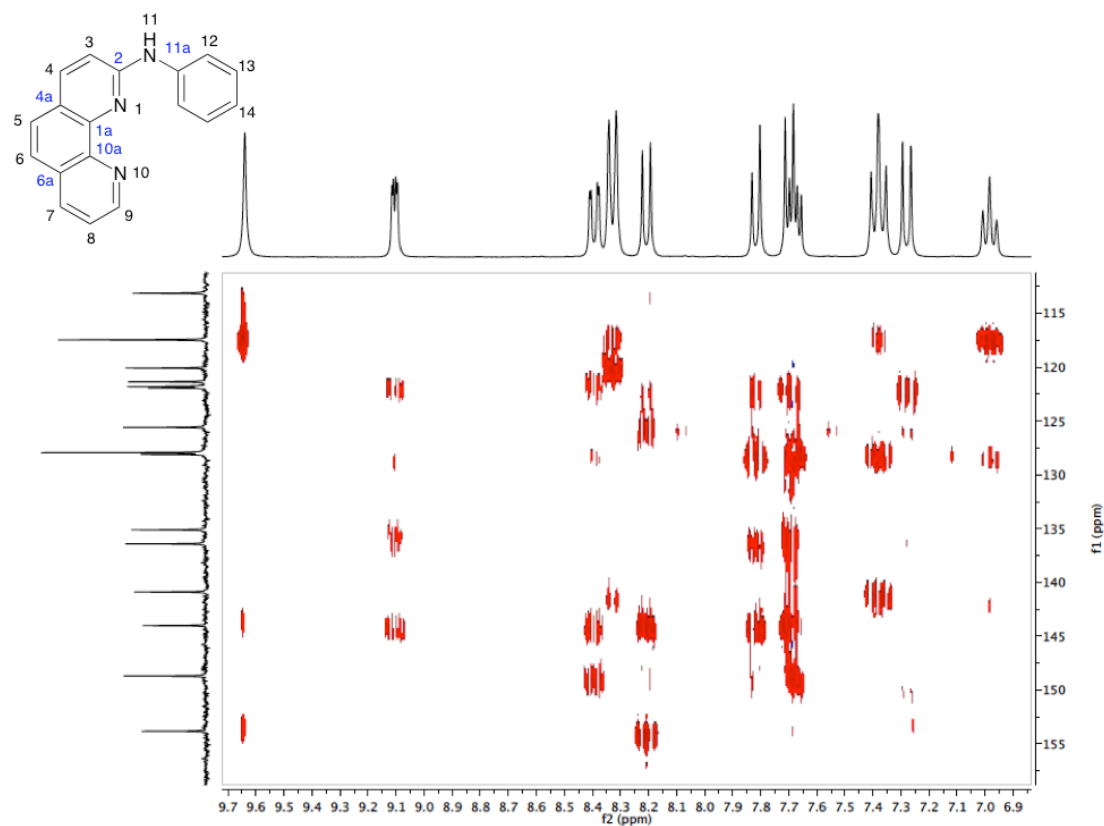

SI Figure 102: HMBC spectrum of *N*-phenyl-1,10-phenanthroline (**3a**)

SI Table 1. Heteronuclear multiple bond correlations (HMBC)

|                     | <sup>1</sup> H NMR | NH               | H9             | H7             | H12            | H4             | H5             | H6               | H8             | H13            | H3   | H14            |
|---------------------|--------------------|------------------|----------------|----------------|----------------|----------------|----------------|------------------|----------------|----------------|------|----------------|
| <sup>13</sup> C NMR | δ                  | 9.63             | 9.09           | 8.38           | 8.32           | 8.20           | 7.81           | 7.70             | 7.68           | 7.37           | 7.27 | 6.97           |
| C3                  | 113.94             | <sup>3</sup> J   |                |                |                |                |                |                  |                |                |      |                |
| C12                 | 118.26             | <sup>3</sup> J   |                |                |                |                |                |                  |                | <sup>2</sup> J |      | <sup>3</sup> J |
| C14                 | 120.87             |                  |                |                | <sup>3</sup> J |                |                |                  |                |                |      |                |
| C8                  | 122.17             |                  | <sup>2</sup> J |                |                |                |                |                  |                |                |      |                |
| C6                  | 122.61             |                  |                | <sup>3</sup> J |                |                |                |                  |                |                |      |                |
| C4a                 | 122.76             |                  |                |                |                |                | <sup>2</sup> J | <sup>3</sup> J   |                |                |      | <sup>3</sup> J |
| C5                  | 126.40             |                  |                |                |                | <sup>3</sup> J |                |                  |                |                |      |                |
| C13                 | 128.83             |                  |                |                |                |                |                |                  |                |                |      | <sup>2</sup> J |
| C6a                 | 128.92             |                  | <sup>4</sup> J | <sup>2</sup> J |                |                | <sup>3</sup> J |                  | <sup>3</sup> J |                |      |                |
| C7                  | 135.92             |                  | <sup>3</sup> J |                |                |                |                |                  |                |                |      |                |
| C4                  | 137.22             |                  |                |                |                |                | <sup>3</sup> J | <sup>4</sup> J W |                |                |      |                |
| C11a                | 141.68             |                  |                |                | <sup>2</sup> J |                |                |                  |                | <sup>3</sup> J |      |                |
| C10a/C1a            | 144.81             | <sup>4</sup> J W | <sup>3</sup> J | <sup>3</sup> J |                | <sup>3</sup> J | <sup>3</sup> J | <sup>3</sup> J   |                |                |      |                |
| C9                  | 149.49             |                  |                | <sup>3</sup> J |                |                |                |                  | <sup>2</sup> J |                |      |                |
| C2                  | 154.62             | <sup>3</sup> J   |                |                |                | <sup>3</sup> J |                |                  |                |                |      |                |

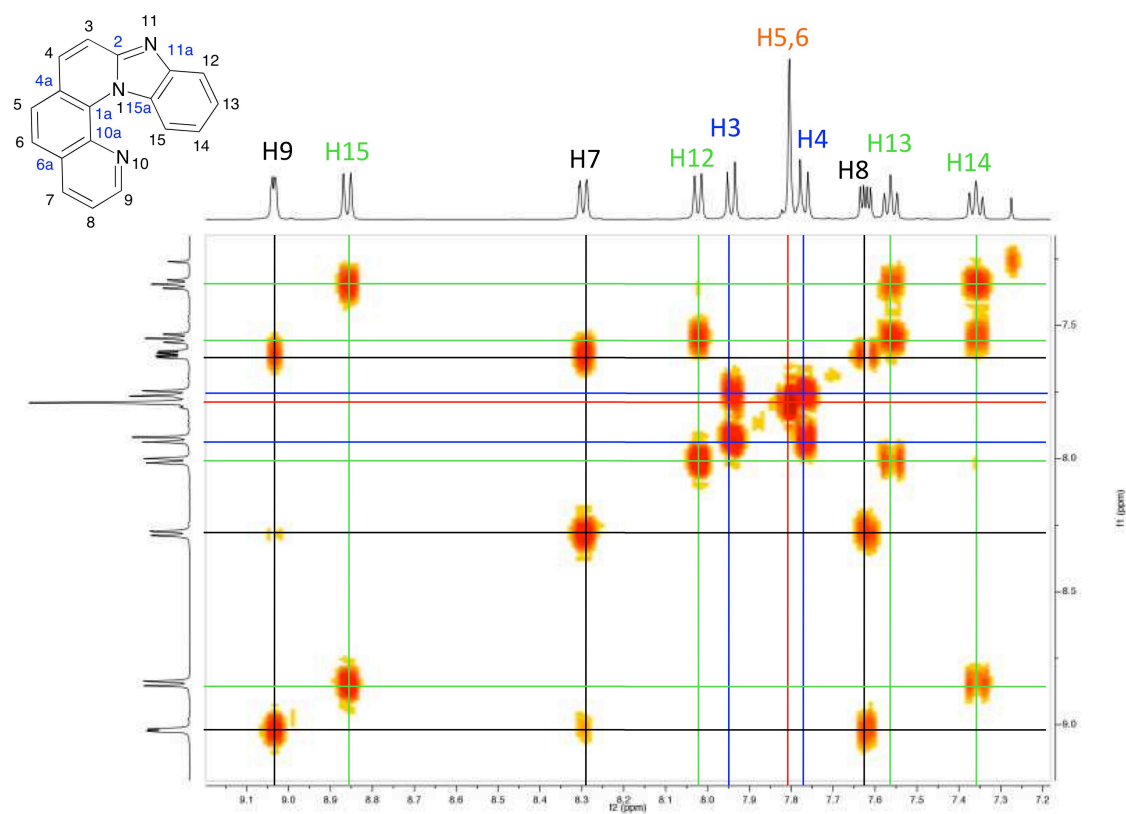

SI Figure 103: COSY spectrum of benzo[4,5]imidazo[1,2-*a*][1,10]phenanthroline (**6a**).

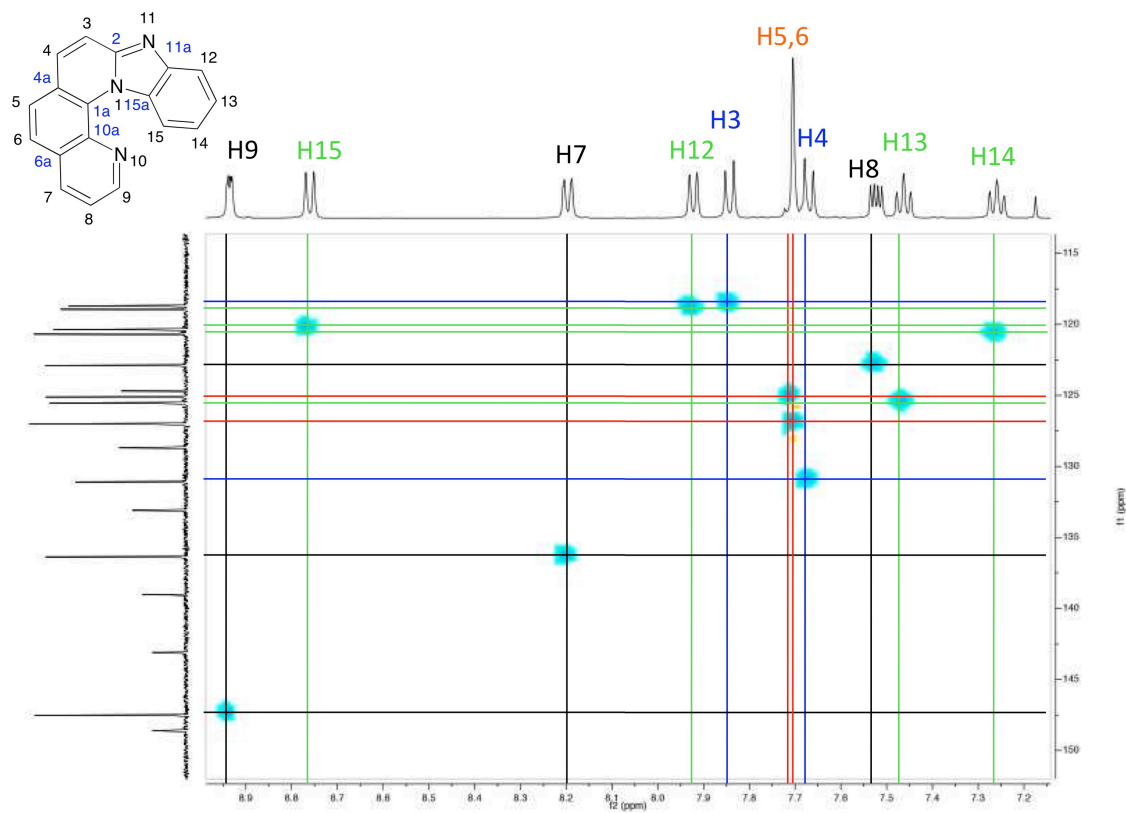

SI Figure 104: HMBC spectrum of benzo[4,5]imidazo[1,2-*a*][1,10]phenanthroline (**6a**).

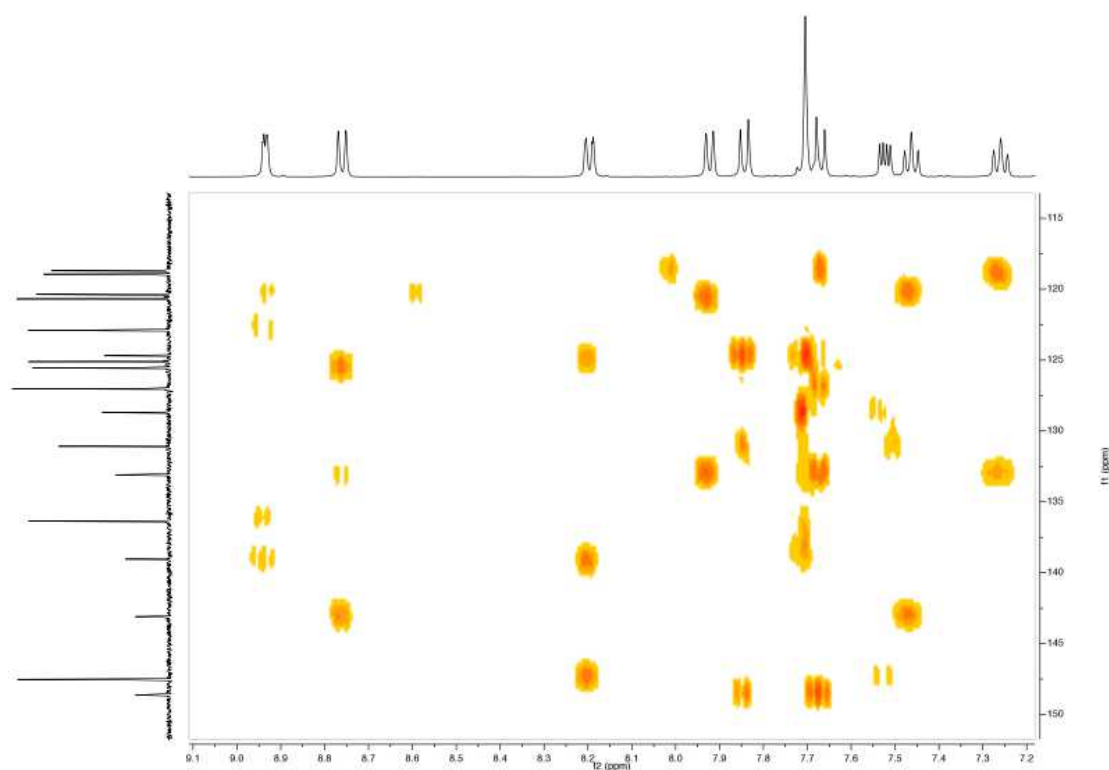

SI Figure 105: HMBC spectrum of benzo[4,5]imidazo[1,2-*a*][1,10]phenanthroline (**6a**).

SI Table 2. Heteronuclear multiple bond correlations (HMBC).

|                 | <sup>1</sup> H | H9             | H15               | H7             | H12               | H3             | H5,6             | H4               | H8             | H13            | H14               |
|-----------------|----------------|----------------|-------------------|----------------|-------------------|----------------|------------------|------------------|----------------|----------------|-------------------|
| <sup>13</sup> C | δ              | 9.02           | 8.85              | 8.28           | 8.01              | 7.93           | 7.79             | 7.75             | 7.61           | 7.55           | 7.34              |
| C3              | 118.70         |                |                   |                |                   |                |                  | <sup>2</sup> J   |                |                |                   |
| C12             | 118.94         |                |                   |                |                   |                |                  |                  |                |                | <sup>3</sup> J    |
| C15             | 120.37         |                |                   |                |                   |                |                  |                  |                | <sup>3</sup> J |                   |
| C14             | 120.69         |                |                   |                | <sup>3</sup> J    |                |                  |                  |                |                |                   |
| C8              | 122.89         | <sup>2</sup> J |                   |                |                   |                |                  |                  |                |                |                   |
| C4a             | 124.69         |                |                   |                |                   | <sup>3</sup> J | <sup>3</sup> J   |                  |                |                |                   |
| C6              | 125.11         |                |                   | <sup>3</sup> J |                   |                |                  |                  |                |                |                   |
| C13             | 125.54         |                | <sup>3</sup> J    |                |                   |                |                  |                  |                |                |                   |
| C5              | 127.01         |                |                   |                |                   |                |                  | <sup>3</sup> J   |                |                |                   |
| C6a             | 128.69         |                |                   |                |                   |                | <sup>3</sup> J   |                  | <sup>3</sup> J |                |                   |
| C4              | 131.09         |                |                   |                |                   | <sup>2</sup> J | <sup>3</sup> J   |                  |                |                |                   |
| *C1a,           | 133.08         |                | <sup>4</sup> JU1a |                |                   |                | <sup>3</sup> J1a | <sup>3</sup> J1a |                |                |                   |
| C15a            | 133.10         |                |                   |                | <sup>3</sup> J15a |                |                  |                  |                |                | <sup>3</sup> J15a |
| C7              | 136.36         | <sup>3</sup> J |                   |                |                   |                |                  |                  |                |                |                   |
| C10a            | 139.04         | <sup>3</sup> J |                   | <sup>3</sup> J |                   |                | <sup>3</sup> J   |                  |                |                |                   |
| C11a            | 143.09         |                | <sup>3</sup> J    |                |                   |                |                  |                  |                | <sup>3</sup> J |                   |
| C9              | 147.52         |                |                   | <sup>3</sup> J |                   |                |                  |                  | <sup>2</sup> J |                |                   |
| C2              | 148.61         |                |                   |                |                   | <sup>2</sup> J |                  | <sup>3</sup> J   |                |                |                   |

\* Not possible to distinguish between C1a and C15a. The <sup>13</sup>C resonances are arbitrarily assigned.

*Theoretical calculations*

SI Table 3. Calculated energies of **6a** (energy minimum) and **6aTS**, the transition state leading to chirality inversion. [B3LYP/6-31+G(d)]

|                                              | <b>6a</b>    | <b>6aTS</b> (-45 cm <sup>-1</sup> )* |
|----------------------------------------------|--------------|--------------------------------------|
| Total Electronic Energy=                     | -856.8458656 | -856.843579                          |
| Zero-point correction=                       | 0.246505     | 0.246395                             |
| Thermal correction to Energy=                | 0.260234     | 0.259354                             |
| Thermal correction to Enthalpy=              | 0.261178     | 0.260299                             |
| Thermal correction to Gibbs Free Energy=     | 0.206062     | 0.207156                             |
| Sum of electronic and zero-point Energies=   | -856.599361  | -856.597184                          |
| Sum of electronic and thermal Energies=      | -856.585632  | -856.584225                          |
| Sum of electronic and thermal Enthalpies=    | -856.584688  | -856.58328                           |
| Sum of electronic and thermal Free Energies= | -856.639804  | -856.636423                          |

\* imaginary vibration (an in and out of molecular plane wagging motion of the “arms” of the structure giving rise to either of the enantiomers).

*Coordinates for the structures 6a and 6aTS*

|   | Compound <b>6a</b> |           |           | Compound <b>6aTS</b> |           |           |
|---|--------------------|-----------|-----------|----------------------|-----------|-----------|
| C | -3.195973          | -2.669596 | -0.350474 | 3.286087             | -2.686682 | 0.000004  |
| C | -3.757723          | -1.476002 | 0.046343  | 3.839769             | -1.426553 | -0.000258 |
| C | -2.949392          | -0.32014  | 0.171633  | 3.008977             | -0.280178 | -0.000256 |
| C | -1.54167           | -0.46402  | -0.066438 | 1.583439             | -0.474693 | 0.000103  |
| C | -1.810074          | -2.68994  | -0.625109 | 1.878869             | -2.776793 | 0.00048   |
| C | -3.504531          | 0.958625  | 0.453152  | 3.567055             | 1.024235  | -0.000389 |
| C | -0.687384          | 0.693912  | 0.053065  | 0.698803             | 0.675386  | -0.0002   |
| C | -1.295702          | 1.963499  | 0.182511  | 1.310181             | 1.956929  | -0.000245 |
| C | -2.700062          | 2.062617  | 0.416106  | 2.729949             | 2.099143  | -0.00038  |
| C | -0.523155          | 3.164629  | 0.015293  | 0.536506             | 3.165402  | 0.000096  |
| H | -1.032516          | 4.121026  | 0.096076  | 1.063507             | 4.11525   | 0.000023  |
| C | 0.798503           | 3.10252   | -0.290965 | -0.815128            | 3.114069  | 0.00043   |
| C | 1.454626           | 1.839941  | -0.309697 | -1.465253            | 1.852501  | 0.000432  |
| H | -4.571621          | 1.047411  | 0.640558  | 4.647069             | 1.146375  | -0.000708 |
| H | -3.792326          | -3.569572 | -0.468232 | 3.898613             | -3.583322 | -0.000121 |
| H | -4.824419          | -1.396347 | 0.244114  | 4.918613             | -1.287809 | -0.000605 |
| H | -1.335428          | -3.605372 | -0.977281 | 1.392976             | -3.752804 | 0.0009    |
| H | -3.12037           | 3.054994  | 0.558987  | 3.130744             | 3.109396  | -0.000527 |
| H | 1.406968           | 3.982003  | -0.470132 | -1.448991            | 3.993641  | 0.000712  |
| C | 2.924765           | 0.297054  | -0.186832 | -2.963392            | 0.339435  | -0.000182 |
| C | 4.14192            | -0.403361 | -0.120839 | -4.207019            | -0.31498  | -0.000601 |
| C | 1.677205           | -1.686206 | 0.529632  | -1.773091            | -1.784924 | 0.000311  |
| C | 4.114757           | -1.732036 | 0.273007  | -4.225266            | -1.699027 | -0.000538 |
| H | 5.069353           | 0.112321  | -0.351618 | -5.116058            | 0.279094  | -0.000883 |
| C | 2.894056           | -2.355691 | 0.612601  | -3.012594            | -2.417445 | 0.000014  |

|   |           |           |           |           |           |           |
|---|-----------|-----------|-----------|-----------|-----------|-----------|
| H | 0.75909   | -2.187768 | 0.791355  | -0.865794 | -2.360235 | 0.000474  |
| H | 5.040964  | -2.296737 | 0.342265  | -5.171224 | -2.23452  | -0.000826 |
| H | 2.899461  | -3.388639 | 0.950866  | -3.035729 | -3.504344 | 0.000075  |
| N | 2.748953  | 1.637408  | -0.430735 | -2.767643 | 1.693537  | -0.000073 |
| N | -1.016853 | -1.644312 | -0.480993 | 1.076703  | -1.729212 | 0.000525  |
| N | 0.712971  | 0.654227  | -0.048028 | -0.721136 | 0.62894   | 0.000576  |
| C | 1.690724  | -0.353235 | 0.090567  | -1.732756 | -0.378088 | 0.000227  |

*Absorption, emission and excitation spectra of 6a in different solvents.*

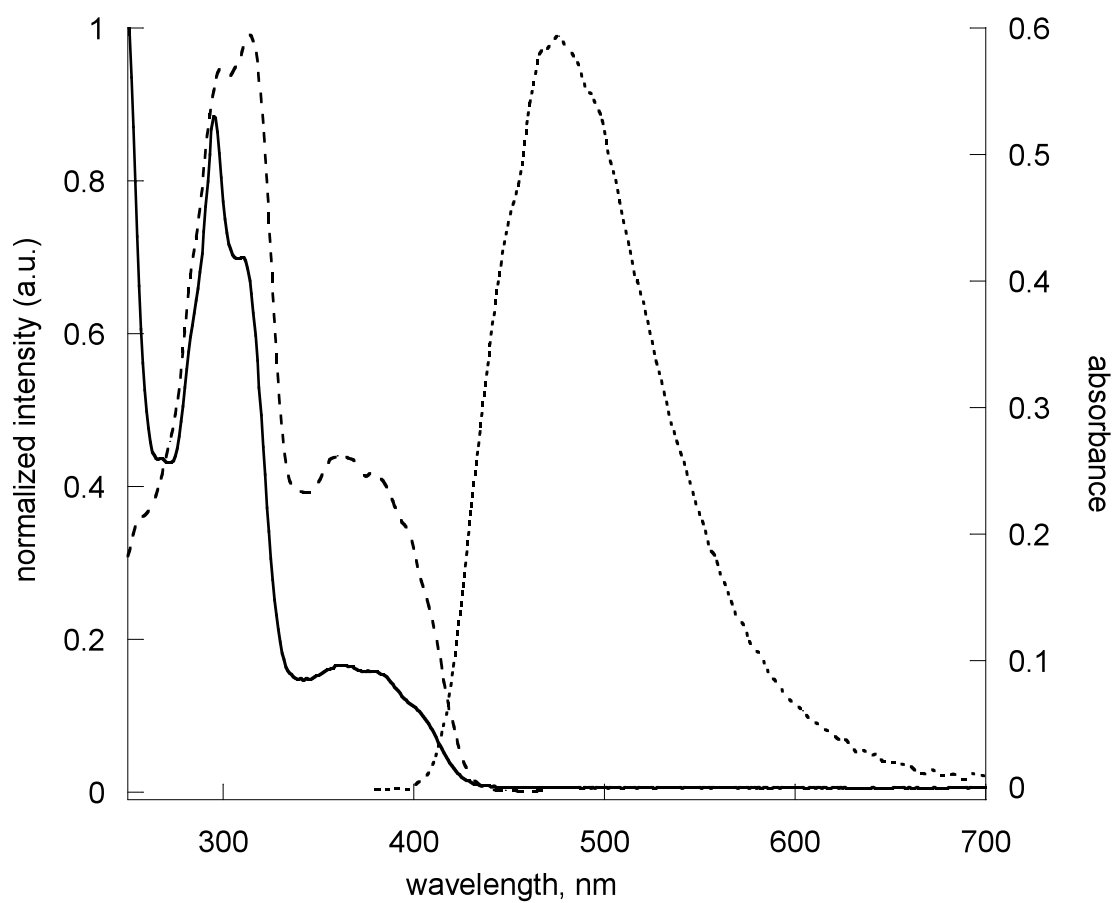

SI Figure 106: Normalized absorption spectra (—), excitation (---) and emission (···) of **6a** in acetonitrile.



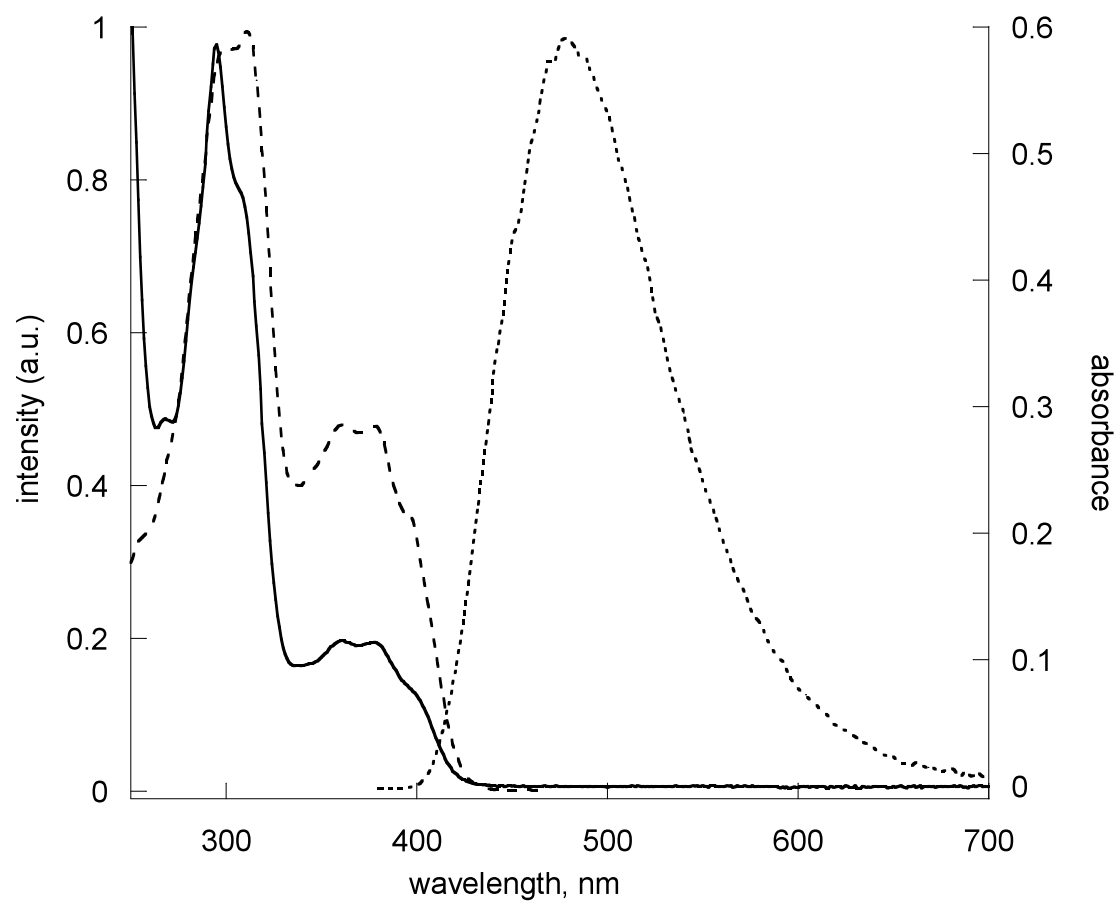

SI Figure 107: Normalized Absorption (—), excitation (---) and emission spectra (···) of **6a** in methanol.

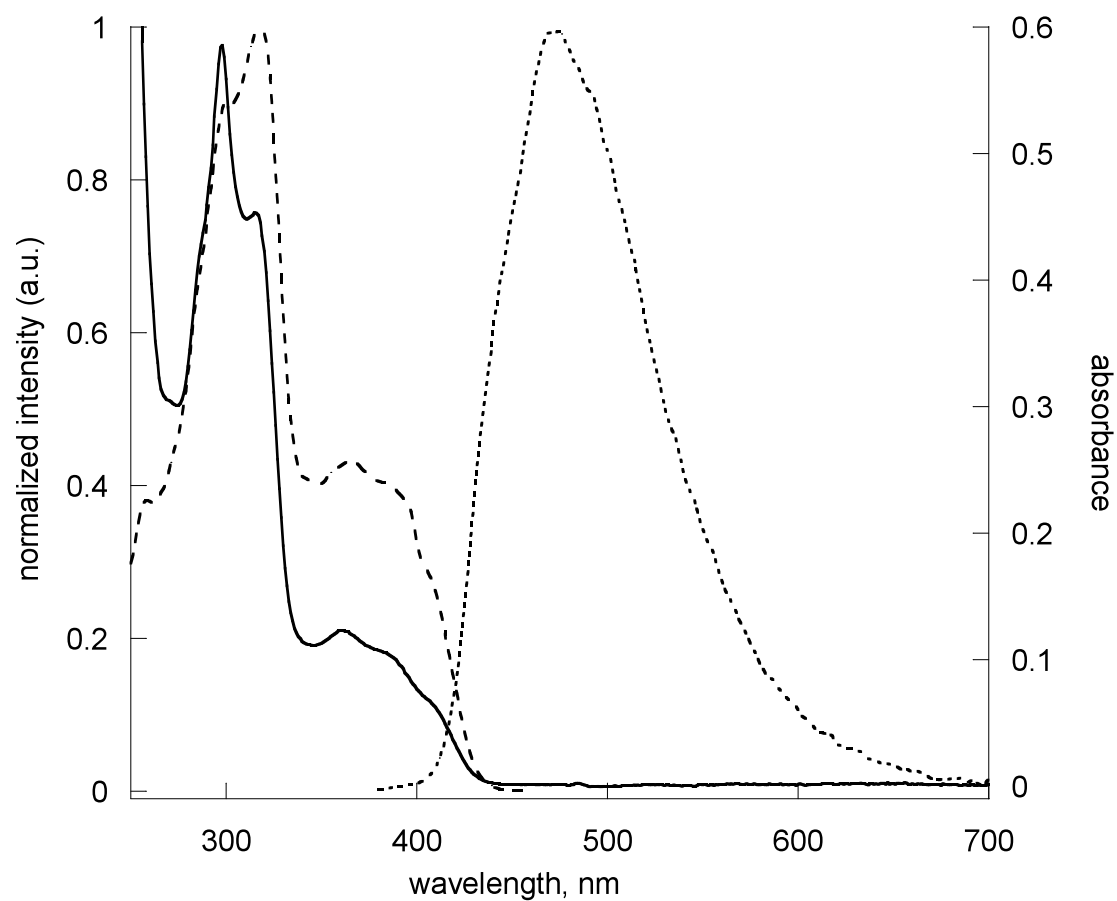

SI Figure 108: Normalized absorption (—), excitation (---) and emission spectra (···) of **6a** in dichloromethane.

## Crystallography experimental and details

Data for compound **6j** were obtained with Mo-K $\alpha$  radiation at 100(2) K by means of a XtaLAB AFC12 (RCD3): Kappa single diffractometer by the NCS crystallographic service, based at the University of Southampton. Data collection, data reduction and unit cell refinement were achieved with CrysAlisPro 1.171.39.9g.<sup>(1)</sup> Correction for absorption was achieved by CrysAlisPro 1.171.39.9g<sup>(1)</sup> Empirical absorption correction using spherical harmonics, implemented in SCALE3 ABSPACK scaling algorithm. The program MERCURY<sup>(2)</sup> were used in the preparation of the Figures. SHELXL97<sup>(3)</sup> and PLATON<sup>(4)</sup> were used in the calculation of molecular geometry. The structures were solved by direct methods using SHELXS-97<sup>(3)</sup> and fully refined by means of the program SHELXL-97.<sup>(3)</sup> All hydrogen atoms were placed in calculated positions.

## References

1. CrysAlisPro 1.171.39.9g Rigaku Oxford Diffraction, 2015.
2. MERCURY 3.9 Cambridge Crystallographic Data Centre: Cambridge, UK.
3. Sheldrick, G.M. A short history of SHELX. *Acta Crystallogr. Sect. A Found. Crystallogr.* **2008**, *64*, 112–122.
4. Spek, A.L. Single-crystal structure validation with the program PLATON. *J. Appl. Crystallogr.* **2003**, *36*, 7–13.

SI Table 4. Crystal data and structure refinement for **6j**.

|                                   |                                                                                                            |
|-----------------------------------|------------------------------------------------------------------------------------------------------------|
| Identification code               | Compound <b>6j</b> , CCDC 1520619                                                                          |
| Empirical formula                 | C <sub>38</sub> H <sub>20</sub> F <sub>6</sub> N <sub>6</sub> (pair of enantiomers)                        |
| Formula weight                    | 674.60                                                                                                     |
| Temperature                       | 100(2) K                                                                                                   |
| Wavelength                        | 0.71073 Å                                                                                                  |
| Crystal system                    | Monoclinic                                                                                                 |
| Space group                       | P2(1)/c                                                                                                    |
| Unit cell dimensions              | a = 15.7235(4) Å alpha = 90 deg<br>b = 7.2386(2) Å beta = 96.401(3) deg<br>c = 25.4616(7) Å gamma = 90 deg |
| Volume                            | 2879.87(14) Å <sup>3</sup>                                                                                 |
| Z                                 | 4                                                                                                          |
| Density (calculated)              | 1.556 Mg/m <sup>3</sup>                                                                                    |
| Absorption coefficient            | 0.122 mm <sup>-1</sup>                                                                                     |
| F(000)                            | 1376                                                                                                       |
| Crystal size                      | 0.070 x 0.050 x 0.020 mm                                                                                   |
| Theta range for data collection   | 2.927 to 27.484 deg.                                                                                       |
| Index ranges                      | -18 ≤ h ≤ 20; -9 ≤ k ≤ 9; -33 ≤ l ≤ 23                                                                     |
| Reflections collected             | 22616                                                                                                      |
| Independent reflections           | 6501 [R(int) = 0.0329]                                                                                     |
| Reflections observed (>2σ)        | 5111                                                                                                       |
| Data Completeness                 | 0.983                                                                                                      |
| Absorption correction             | Semi-empirical from equivalents                                                                            |
| Max. and min. transmission        | 1.00000 and 0.66434                                                                                        |
| Refinement method                 | Full-matrix least-squares on F <sup>2</sup>                                                                |
| Data / restraints / parameters    | 6501 / 0 / 451                                                                                             |
| Goodness-of-fit on F <sup>2</sup> | 1.062                                                                                                      |
| Final R indices [I > 2σ(I)]       | R <sub>1</sub> = 0.0532 wR <sub>2</sub> = 0.1128                                                           |
| R indices (all data)              | R <sub>1</sub> = 0.0738 wR <sub>2</sub> = 0.1223                                                           |
| Largest diff. peak and hole       | 0.382 and -0.252 e.Å <sup>-3</sup>                                                                         |
|                                   |                                                                                                            |

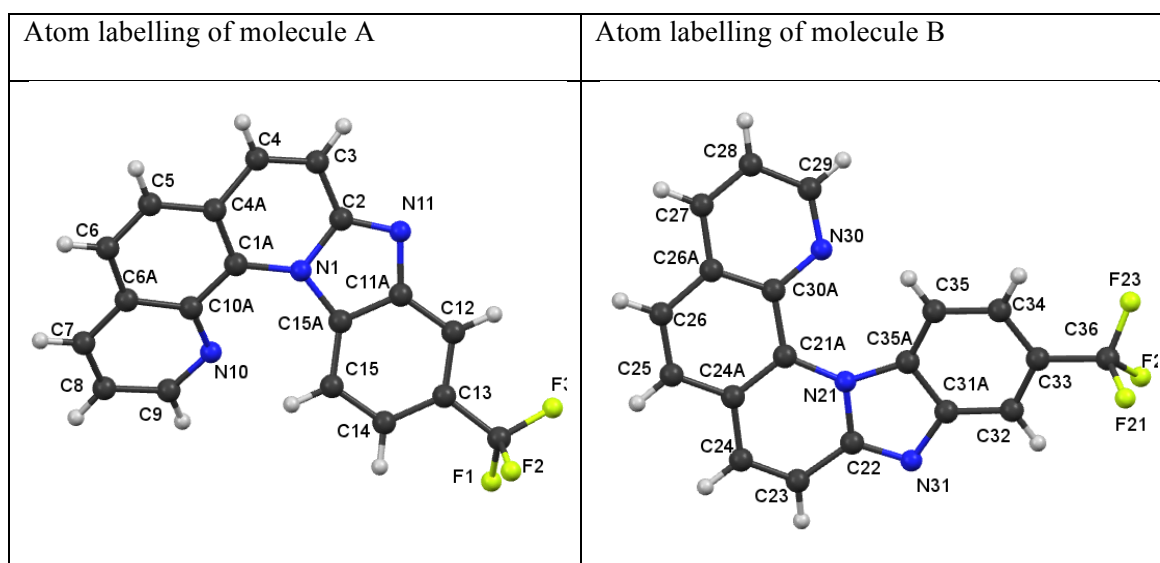

| Molecule A                                                                        | Molecule B                                                                         |
|-----------------------------------------------------------------------------------|------------------------------------------------------------------------------------|
| 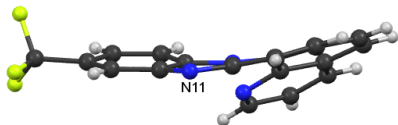 |  |
| View of Molecule A                                                                | View of molecule B                                                                 |

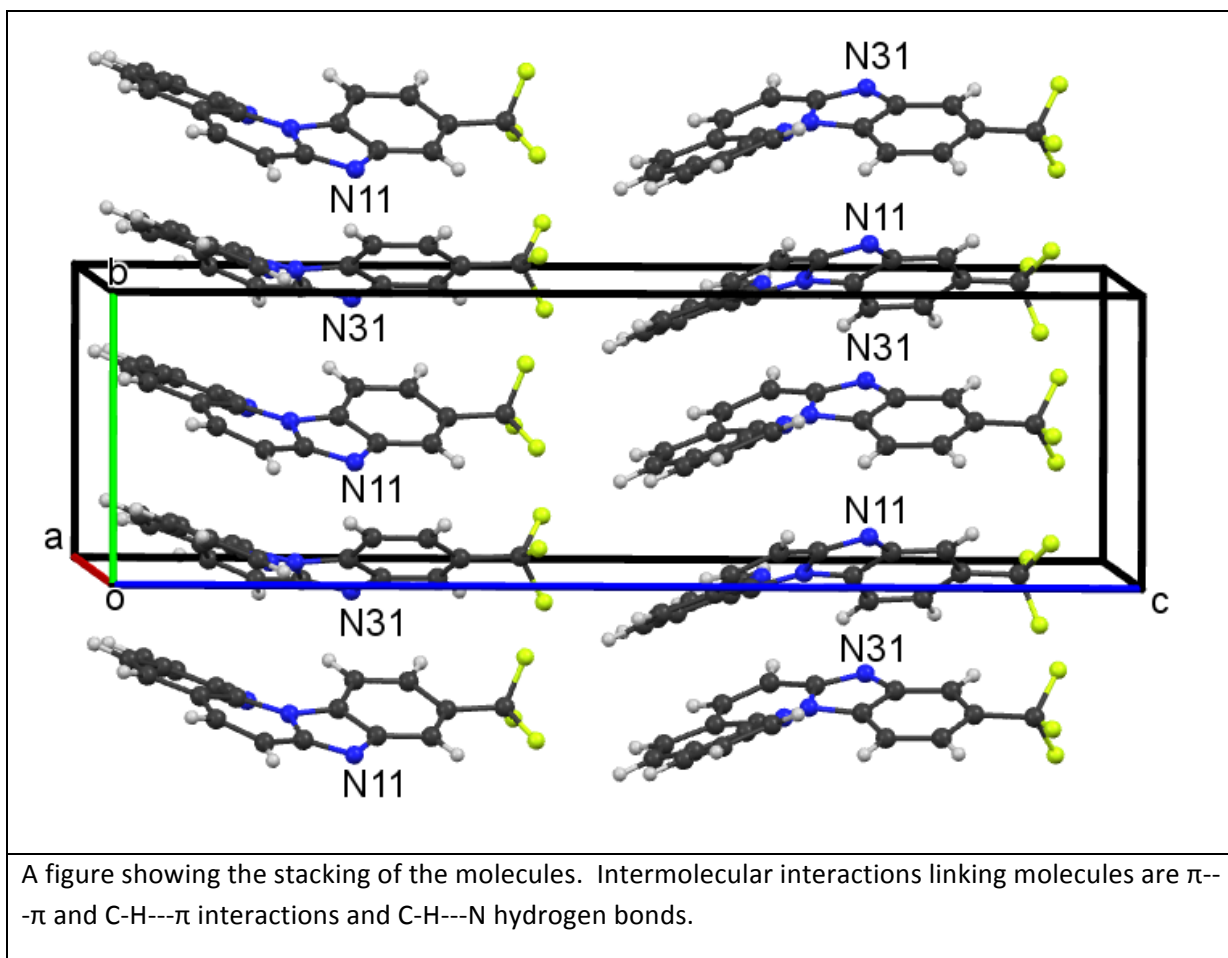

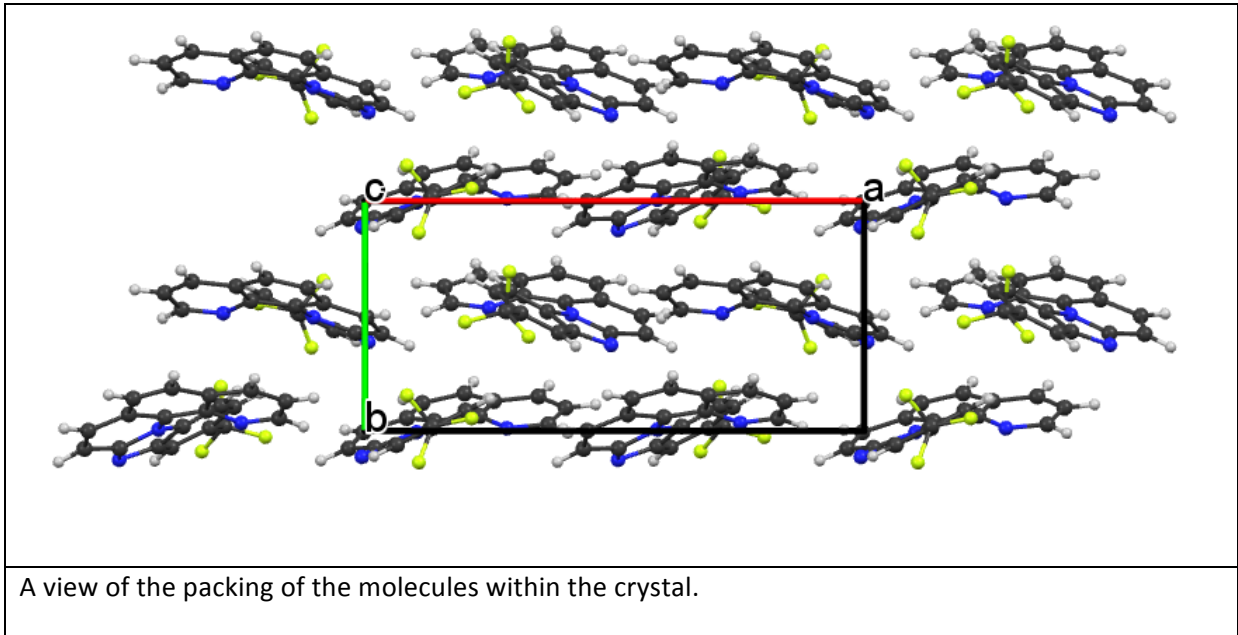

SI Table 5. Atomic coordinates ( $\times 10^4$ ) and equivalent isotropic displacement parameters ( $\text{\AA}^2 \times 10^3$ ) for **6j**.  $U(\text{eq})$  is defined as one third of the trace of the orthogonalized  $U_{ij}$  tensor.

| Atom   | x        | y        | z       | $U(\text{eq})$ |
|--------|----------|----------|---------|----------------|
| F(1)   | 8000(1)  | 10266(2) | 9195(1) | 32(1)          |
| F(23)  | 7865(1)  | 4454(2)  | 9432(1) | 31(1)          |
| F(21)  | 9163(1)  | 3450(2)  | 9509(1) | 36(1)          |
| F(2)   | 7108(1)  | 8079(2)  | 9274(1) | 37(1)          |
| F(22)  | 8922(1)  | 6375(2)  | 9524(1) | 35(1)          |
| F(3)   | 6725(1)  | 10899(2) | 9368(1) | 39(1)          |
| N(21)  | 8966(1)  | 5057(2)  | 7105(1) | 18(1)          |
| N(1)   | 5859(1)  | 9939(2)  | 6938(1) | 18(1)          |
| N(31)  | 10064(1) | 6129(2)  | 7693(1) | 21(1)          |
| N(10)  | 7518(1)  | 9649(2)  | 6588(1) | 20(1)          |
| N(30)  | 7158(1)  | 4881(2)  | 6792(1) | 21(1)          |
| N(11)  | 5072(1)  | 11257(2) | 7539(1) | 22(1)          |
| C(10A) | 6819(1)  | 9121(3)  | 6258(1) | 18(1)          |
| C(15A) | 6350(1)  | 9805(3)  | 7431(1) | 18(1)          |
| C(35)  | 7987(1)  | 4112(3)  | 7815(1) | 19(1)          |
| C(35A) | 8695(1)  | 4903(3)  | 7613(1) | 17(1)          |
| C(15)  | 7110(1)  | 8897(3)  | 7614(1) | 18(1)          |
| C(21A) | 8610(1)  | 4568(3)  | 6592(1) | 17(1)          |
| C(22)  | 9812(1)  | 5733(3)  | 7194(1) | 19(1)          |
| C(1A)  | 5987(1)  | 9401(3)  | 6423(1) | 18(1)          |
| C(33)  | 8653(1)  | 4869(3)  | 8698(1) | 20(1)          |
| C(34)  | 7976(1)  | 4129(3)  | 8358(1) | 20(1)          |
| C(30A) | 7706(1)  | 4342(3)  | 6445(1) | 18(1)          |
| C(14)  | 7369(1)  | 8958(3)  | 8149(1) | 19(1)          |
| C(13)  | 6884(1)  | 9877(3)  | 8502(1) | 19(1)          |
| C(32)  | 9364(1)  | 5609(3)  | 8504(1) | 20(1)          |
| C(26A) | 7420(1)  | 3701(3)  | 5929(1) | 21(1)          |
| C(24A) | 9163(1)  | 4438(3)  | 6200(1) | 20(1)          |
| C(31A) | 9385(1)  | 5609(3)  | 7958(1) | 18(1)          |
| C(23)  | 10333(1) | 5768(3)  | 6773(1) | 22(1)          |
| C(6A)  | 6884(1)  | 8454(3)  | 5738(1) | 20(1)          |
| C(11A) | 5850(1)  | 10674(3) | 7786(1) | 20(1)          |
| C(12)  | 6117(1)  | 10719(3) | 8326(1) | 21(1)          |
| C(5)   | 5355(1)  | 8590(3)  | 5535(1) | 24(1)          |
| C(4A)  | 5264(1)  | 9285(3)  | 6048(1) | 21(1)          |
| C(16)  | 7176(1)  | 9796(3)  | 9077(1) | 24(1)          |
| C(6)   | 6130(1)  | 8138(3)  | 5388(1) | 23(1)          |
| C(2)   | 5082(1)  | 10754(3) | 7043(1) | 20(1)          |
| C(9)   | 8277(1)  | 9446(3)  | 6422(1) | 22(1)          |
| C(3)   | 4377(1)  | 10781(3) | 6640(1) | 22(1)          |
| C(28)  | 5983(1)  | 3994(3)  | 6152(1) | 25(1)          |
| C(27)  | 6528(1)  | 3498(3)  | 5796(1) | 24(1)          |
| C(29)  | 6327(1)  | 4713(3)  | 6643(1) | 23(1)          |
| C(7)   | 7712(1)  | 8223(3)  | 5586(1) | 22(1)          |
| C(8)   | 8408(1)  | 8713(3)  | 5925(1) | 23(1)          |
| C(25)  | 8852(1)  | 3784(3)  | 5689(1) | 23(1)          |
| C(26)  | 8012(1)  | 3368(3)  | 5559(1) | 24(1)          |
| C(4)   | 4454(1)  | 9992(3)  | 6171(1) | 23(1)          |
| C(36)  | 8646(1)  | 4787(3)  | 9284(1) | 25(1)          |
| C(24)  | 10034(1) | 5057(3)  | 6303(1) | 22(1)          |

SI Table 6. Bond lengths [ $\text{\AA}$ ] and angles [ $^\circ$ ] for **6j**.

| Bond          | Length [ $\text{\AA}$ ] | Angle                | [ $^\circ$ ] |
|---------------|-------------------------|----------------------|--------------|
| F(1)-C(16)    | 1.341(2)                | C(21A)-N(21)-C(35A)  | 134.51(17)   |
| F(23)-C(36)   | 1.346(3)                | C(21A)-N(21)-C(22)   | 120.40(16)   |
| F(21)-C(36)   | 1.349(3)                | C(35A)-N(21)-C(22)   | 104.86(16)   |
| F(2)-C(16)    | 1.349(3)                | C(15A)-N(1)-C(1A)    | 134.14(17)   |
| F(22)-C(36)   | 1.350(3)                | C(15A)-N(1)-C(2)     | 105.08(16)   |
| F(3)-C(16)    | 1.344(2)                | C(1A)-N(1)-C(2)      | 120.74(16)   |
| N(21)-C(21A)  | 1.408(2)                | C(22)-N(31)-C(31A)   | 104.25(16)   |
| N(21)-C(35A)  | 1.409(3)                | C(9)-N(10)-C(10A)    | 117.89(18)   |
| N(21)-C(22)   | 1.411(2)                | C(29)-N(30)-C(30A)   | 117.77(18)   |
| N(1)-C(15A)   | 1.402(2)                | C(2)-N(11)-C(11A)    | 104.43(17)   |
| N(1)-C(1A)    | 1.403(3)                | N(10)-C(10A)-C(6A)   | 122.20(18)   |
| N(1)-C(2)     | 1.410(3)                | N(10)-C(10A)-C(1A)   | 118.64(18)   |
| N(31)-C(22)   | 1.318(3)                | C(6A)-C(10A)-C(1A)   | 118.93(18)   |
| N(31)-C(31A)  | 1.378(3)                | C(15)-C(15A)-N(1)    | 134.07(18)   |
| N(10)-C(9)    | 1.319(3)                | C(15)-C(15A)-C(11A)  | 120.83(18)   |
| N(10)-C(10A)  | 1.361(3)                | N(1)-C(15A)-C(11A)   | 104.70(17)   |
| N(30)-C(29)   | 1.325(3)                | C(34)-C(35)-C(35A)   | 117.57(19)   |
| N(30)-C(30A)  | 1.357(3)                | C(34)-C(35)-H(35)    | 121.2        |
| N(11)-C(2)    | 1.315(3)                | C(35A)-C(35)-H(35)   | 121.2        |
| N(11)-C(11A)  | 1.378(3)                | C(35)-C(35A)-N(21)   | 134.76(19)   |
| C(10A)-C(6A)  | 1.422(3)                | C(35)-C(35A)-C(31A)  | 120.37(18)   |
| C(10A)-C(1A)  | 1.434(3)                | N(21)-C(35A)-C(31A)  | 104.56(16)   |
| C(15A)-C(15)  | 1.398(3)                | C(14)-C(15)-C(15A)   | 117.51(18)   |
| C(15A)-C(11A) | 1.410(3)                | C(14)-C(15)-H(15)    | 121.2        |
| C(35)-C(34)   | 1.384(3)                | C(15A)-C(15)-H(15)   | 121.2        |
| C(35)-C(35A)  | 1.400(3)                | C(24A)-C(21A)-N(21)  | 117.75(17)   |
| C(35)-H(35)   | 0.9500                  | C(24A)-C(21A)-C(30A) | 118.75(18)   |
| C(35A)-C(31A) | 1.414(3)                | N(21)-C(21A)-C(30A)  | 123.31(17)   |
| C(15)-C(14)   | 1.378(3)                | N(31)-C(22)-N(21)    | 114.03(17)   |
| C(15)-H(15)   | 0.9500                  | N(31)-C(22)-C(23)    | 125.88(18)   |
| C(21A)-C(24A) | 1.399(3)                | N(21)-C(22)-C(23)    | 119.79(18)   |
| C(21A)-C(30A) | 1.439(3)                | C(4A)-C(1A)-N(1)     | 117.57(18)   |
| C(22)-C(23)   | 1.422(3)                | C(4A)-C(1A)-C(10A)   | 119.27(18)   |
| C(1A)-C(4A)   | 1.403(3)                | N(1)-C(1A)-C(10A)    | 122.95(17)   |
| C(33)-C(32)   | 1.381(3)                | C(32)-C(33)-C(34)    | 121.04(19)   |
| C(33)-C(34)   | 1.402(3)                | C(32)-C(33)-C(36)    | 117.99(19)   |
| C(33)-C(36)   | 1.495(3)                | C(34)-C(33)-C(36)    | 120.89(18)   |
| C(34)-H(34)   | 0.9500                  | C(35)-C(34)-C(33)    | 121.86(19)   |
| C(30A)-C(26A) | 1.419(3)                | C(35)-C(34)-H(34)    | 119.1        |
| C(14)-C(13)   | 1.408(3)                | C(33)-C(34)-H(34)    | 119.1        |
| C(14)-H(14)   | 0.9500                  | N(30)-C(30A)-C(26A)  | 122.50(18)   |
| C(13)-C(12)   | 1.380(3)                | N(30)-C(30A)-C(21A)  | 118.61(18)   |
| C(13)-C(16)   | 1.486(3)                | C(26A)-C(30A)-C(21A) | 118.70(18)   |
| C(32)-C(31A)  | 1.393(3)                | C(15)-C(14)-C(13)    | 121.57(19)   |
| C(32)-H(32)   | 0.9500                  | C(15)-C(14)-H(14)    | 119.2        |
| C(26A)-C(27)  | 1.413(3)                | C(13)-C(14)-H(14)    | 119.2        |
| C(26A)-C(26)  | 1.415(3)                | C(12)-C(13)-C(14)    | 121.27(19)   |
| C(24A)-C(25)  | 1.419(3)                | C(12)-C(13)-C(16)    | 119.90(18)   |
| C(24A)-C(24)  | 1.436(3)                | C(14)-C(13)-C(16)    | 118.64(18)   |



|              |          |                     |            |
|--------------|----------|---------------------|------------|
| C(23)-C(24)  | 1.338(3) | C(33)-C(32)-C(31A)  | 117.89(18) |
| C(23)-H(23)  | 0.9500   | C(33)-C(32)-H(32)   | 121.1      |
| C(6A)-C(7)   | 1.410(3) | C(31A)-C(32)-H(32)  | 121.1      |
| C(6A)-C(6)   | 1.422(3) | C(27)-C(26A)-C(26)  | 122.08(19) |
| C(11A)-C(12) | 1.393(3) | C(27)-C(26A)-C(30A) | 117.36(19) |
| C(12)-H(12)  | 0.9500   | C(26)-C(26A)-C(30A) | 120.49(19) |
| C(5)-C(6)    | 1.354(3) | C(21A)-C(24A)-C(25) | 119.92(19) |
| C(5)-C(4A)   | 1.422(3) | C(21A)-C(24A)-C(24) | 120.20(19) |
| C(5)-H(5)    | 0.9500   | C(25)-C(24A)-C(24)  | 119.79(18) |
| C(4A)-C(4)   | 1.439(3) | N(31)-C(31A)-C(32)  | 126.49(18) |
| C(6)-H(6)    | 0.9500   | N(31)-C(31A)-C(35A) | 112.13(17) |
| C(2)-C(3)    | 1.425(3) | C(32)-C(31A)-C(35A) | 121.20(18) |
| C(9)-C(8)    | 1.407(3) | C(24)-C(23)-C(22)   | 119.53(19) |
| C(9)-H(9)    | 0.9500   | C(24)-C(23)-H(23)   | 120.2      |
| C(3)-C(4)    | 1.341(3) | C(22)-C(23)-H(23)   | 120.2      |
| C(3)-H(3)    | 0.9500   | C(7)-C(6A)-C(6)     | 122.68(19) |
| C(28)-C(27)  | 1.363(3) | C(7)-C(6A)-C(10A)   | 117.42(18) |
| C(28)-C(29)  | 1.407(3) | C(6)-C(6A)-C(10A)   | 119.81(18) |
| C(28)-H(28)  | 0.9500   | N(11)-C(11A)-C(12)  | 126.77(19) |
| C(27)-H(27)  | 0.9500   | N(11)-C(11A)-C(15A) | 111.88(18) |
| C(29)-H(29)  | 0.9500   | C(12)-C(11A)-C(15A) | 121.04(18) |
| C(7)-C(8)    | 1.363(3) | C(13)-C(12)-C(11A)  | 117.69(19) |
| C(7)-H(7)    | 0.9500   | C(13)-C(12)-H(12)   | 121.2      |
| C(8)-H(8)    | 0.9500   | C(11A)-C(12)-H(12)  | 121.2      |
| C(25)-C(26)  | 1.359(3) | C(6)-C(5)-C(4A)     | 121.75(19) |
| C(25)-H(25)  | 0.9500   | C(6)-C(5)-H(5)      | 119.1      |
| C(26)-H(26)  | 0.9500   | C(4A)-C(5)-H(5)     | 119.1      |
| C(4)-H(4)    | 0.9500   | C(1A)-C(4A)-C(5)    | 119.28(19) |
| C(24)-H(24)  | 0.9500   | C(1A)-C(4A)-C(4)    | 120.04(19) |
|              |          | C(5)-C(4A)-C(4)     | 120.51(19) |
|              |          | F(1)-C(16)-F(3)     | 106.36(17) |
|              |          | F(1)-C(16)-F(2)     | 105.35(17) |
|              |          | F(3)-C(16)-F(2)     | 105.83(17) |
|              |          | F(1)-C(16)-C(13)    | 113.30(17) |
|              |          | F(3)-C(16)-C(13)    | 113.32(18) |
|              |          | F(2)-C(16)-C(13)    | 112.04(17) |
|              |          | C(5)-C(6)-C(6A)     | 120.0(2)   |
|              |          | C(5)-C(6)-H(6)      | 120.0      |
|              |          | C(6A)-C(6)-H(6)     | 120.0      |
|              |          | N(11)-C(2)-N(1)     | 113.69(17) |
|              |          | N(11)-C(2)-C(3)     | 126.63(19) |
|              |          | N(1)-C(2)-C(3)      | 119.32(18) |
|              |          | N(10)-C(9)-C(8)     | 123.94(19) |
|              |          | N(10)-C(9)-H(9)     | 118.0      |
|              |          | C(8)-C(9)-H(9)      | 118.0      |
|              |          | C(4)-C(3)-C(2)      | 119.72(19) |
|              |          | C(4)-C(3)-H(3)      | 120.1      |
|              |          | C(2)-C(3)-H(3)      | 120.1      |
|              |          | C(27)-C(28)-C(29)   | 118.73(19) |
|              |          | C(27)-C(28)-H(28)   | 120.6      |
|              |          | C(29)-C(28)-H(28)   | 120.6      |
|              |          | C(28)-C(27)-C(26A)  | 119.6(2)   |

|  |  |                    |            |
|--|--|--------------------|------------|
|  |  | C(28)-C(27)-H(27)  | 120.2      |
|  |  | C(26A)-C(27)-H(27) | 120.2      |
|  |  | N(30)-C(29)-C(28)  | 123.8(2)   |
|  |  | N(30)-C(29)-H(29)  | 118.1      |
|  |  | C(28)-C(29)-H(29)  | 118.1      |
|  |  | C(8)-C(7)-C(6A)    | 119.67(19) |
|  |  | C(8)-C(7)-H(7)     | 120.2      |
|  |  | C(6A)-C(7)-H(7)    | 120.2      |
|  |  | C(7)-C(8)-C(9)     | 118.73(19) |
|  |  | C(7)-C(8)-H(8)     | 120.6      |
|  |  | C(9)-C(8)-H(8)     | 120.6      |
|  |  | C(26)-C(25)-C(24A) | 121.55(19) |
|  |  | C(26)-C(25)-H(25)  | 119.2      |
|  |  | C(24A)-C(25)-H(25) | 119.2      |
|  |  | C(25)-C(26)-C(26A) | 119.60(19) |
|  |  | C(25)-C(26)-H(26)  | 120.2      |
|  |  | C(26A)-C(26)-H(26) | 120.2      |
|  |  | C(3)-C(4)-C(4A)    | 120.99(19) |
|  |  | C(3)-C(4)-H(4)     | 119.5      |
|  |  | C(4A)-C(4)-H(4)    | 119.5      |
|  |  | F(23)-C(36)-F(21)  | 106.19(17) |
|  |  | F(23)-C(36)-F(22)  | 106.49(17) |
|  |  | F(21)-C(36)-F(22)  | 105.76(17) |
|  |  | F(23)-C(36)-C(33)  | 113.13(18) |
|  |  | F(21)-C(36)-C(33)  | 112.40(18) |
|  |  | F(22)-C(36)-C(33)  | 112.32(18) |
|  |  | C(23)-C(24)-C(24A) | 121.14(19) |
|  |  | C(23)-C(24)-H(24)  | 119.4      |
|  |  | C(24A)-C(24)-H(24) | 119.4      |
|  |  |                    |            |
